# Supplementary material for: The Nab2 RNA binding protein promotes sex-specific splicing of Sex lethal in Drosophila neuronal tissue
Source: bioRxiv preprint, doi:10.1101/2020.11.13.382168, version 4 (2021-08-16)
Supplement: Supplemental Table 1 [file 382168_file03.xlsx]

## Sheet: Differential Expression Results
Supplemental Table 1: DESeq2 results for all genes
gene_name	Mean Normalized Counts (Across ALL Samples)	Fold Change Nab2ex3 vs. control	Log2 Fold Change Nab2ex3 vs. control	Standard Error Log2 Fold Change	Wald Statistic	p-value	Adjusted p-value (FDR-controlled significance)	Significant? (Adjusted p < 0.05)	Sex
yellow-d2	999.31	90.19	6.49496	0.224991	28.8677	3.04e-183	3.74e-179	yes	female
Hsp70Ba	706.632	42.4	5.40587	0.253866	21.2942	1.28e-100	7.89e-97	yes	female
noe	258365	4.03	2.0093	0.105777	18.9956	1.86e-80	7.6e-77	yes	female
snRNA:U2:34ABa	7821.48	34.92	5.12603	0.277917	18.4444	5.78e-76	1.78e-72	yes	female
Arc1	15482	5.35	2.41927	0.136994	17.6596	8.58e-70	2.11e-66	yes	female
Cyp9f3	383.154	0.18	-2.46238	0.147461	-16.6985	1.34e-62	2.75e-59	yes	female
CR43696	80.0495	20.07	4.32699	0.260392	16.6172	5.23e-62	9.18e-59	yes	female
CG5897	156.119	7.2	2.84774	0.177243	16.0668	4.36e-58	6.69e-55	yes	female
CG17669	147.662	10.6	3.40557	0.21944	15.5194	2.57e-54	3.5e-51	yes	female
CG31606	256.623	0.09	-3.45201	0.2228	-15.4938	3.82e-54	4.7e-51	yes	female
FASN2	275.22	0.16	-2.6465	0.172177	-15.3708	2.57e-53	2.87e-50	yes	female
CG7227	649.636	0.3	-1.75821	0.115449	-15.2293	2.26e-52	2.31e-49	yes	female
CG34166	738.997	8.39	3.06856	0.202849	15.1273	1.07e-51	1.01e-48	yes	female
GstT4	3419.63	2.14	1.09929	0.0734699	14.9624	1.29e-50	1.13e-47	yes	female
CG31077	141.875	0.06	-4.0527	0.281168	-14.4138	4.24e-47	3.47e-44	yes	female
CR45601	309.186	5.99	2.58147	0.184921	13.9599	2.74e-44	2.1e-41	yes	female
ome	1639.96	0.32	-1.63655	0.117991	-13.8702	9.6e-44	6.94e-41	yes	female
Hsp68	6528.22	6.31	2.65814	0.195537	13.5941	4.34e-42	2.96e-39	yes	female
CG7054	800.065	3.59	1.84445	0.142621	12.9326	2.95e-38	1.91e-35	yes	female
snoRNA:Psi28S-1153	329.629	7.27	2.8621	0.223952	12.78	2.12e-37	1.3e-34	yes	female
Cyp6a17	1991.13	4.02	2.00673	0.158688	12.6458	1.18e-36	6.9e-34	yes	female
Obp8a	160.672	8.05	3.00982	0.24313	12.3794	3.38e-35	1.89e-32	yes	female
CG8757	141.395	0.19	-2.4034	0.194618	-12.3493	4.91e-35	2.62e-32	yes	female
CG14645	58.5817	0.08	-3.63325	0.296821	-12.2405	1.89e-34	9.66e-32	yes	female
GNBP-like3	799.408	6.01	2.58835	0.212043	12.2067	2.86e-34	1.41e-31	yes	female
l(2)41Ab	762.589	0.31	-1.67115	0.143123	-11.6763	1.68e-31	7.96e-29	yes	female
CG5506	47.103	0.1	-3.39263	0.291826	-11.6255	3.06e-31	1.39e-28	yes	female
CG10924	1454.54	0.3	-1.7224	0.151176	-11.3933	4.51e-30	1.98e-27	yes	female
CR43697	35.5148	9.42	3.23527	0.28742	11.2562	2.16e-29	9.14e-27	yes	female
CG3906	29.132	0.1	-3.31642	0.295094	-11.2385	2.64e-29	1.08e-26	yes	female
l(2)efl	1229.29	3.8	1.92698	0.171866	11.2121	3.55e-29	1.41e-26	yes	female
ade5	22054.9	2.34	1.22399	0.109738	11.1538	6.86e-29	2.64e-26	yes	female
CG15279	1366.3	1.99	0.995375	0.0909751	10.9412	7.32e-28	2.73e-25	yes	female
IM1	9722.62	4.93	2.30223	0.211016	10.9102	1.03e-27	3.72e-25	yes	female
Hml	2434.5	0.16	-2.66931	0.247126	-10.8014	3.39e-27	1.19e-24	yes	female
Pde6	4431.62	0.51	-0.963243	0.0903068	-10.6663	1.46e-26	4.99e-24	yes	female
Hsp26	2536.23	4.55	2.18557	0.212395	10.2901	7.81e-25	2.59e-22	yes	female
CR40190	106.614	0.27	-1.90772	0.185627	-10.2772	8.93e-25	2.89e-22	yes	female
Yp3	54852.1	7.84	2.97049	0.293113	10.1343	3.89e-24	1.23e-21	yes	female
DIP-epsilon	2444.2	1.9	0.923931	0.0919176	10.0517	9.03e-24	2.77e-21	yes	female
Ance-3	2332.51	1.97	0.980989	0.0976691	10.044	9.76e-24	2.93e-21	yes	female
PH4alphaMP	51.0602	0.2	-2.35622	0.235898	-9.98833	1.71e-23	5.02e-21	yes	female
CG13720	680.744	0.22	-2.20362	0.220756	-9.98218	1.82e-23	5.21e-21	yes	female
CG14207	9992.63	2.27	1.18442	0.118741	9.97481	1.96e-23	5.49e-21	yes	female
Hsp70Bb	995.096	4.46	2.15685	0.217411	9.92062	3.39e-23	9.25e-21	yes	female
Cyp6a20	3932.36	0.44	-1.17836	0.11906	-9.89722	4.28e-23	1.14e-20	yes	female
CG9338	712.938	2.26	1.17326	0.118959	9.86272	6.04e-23	1.58e-20	yes	female
Tsp42Ej	3895.74	3.69	1.88327	0.192357	9.79051	1.24e-22	3.17e-20	yes	female
CG42671	4083.26	1.8	0.849344	0.0868396	9.78061	1.36e-22	3.42e-20	yes	female
Tdc1	354.918	2.34	1.22897	0.126001	9.75362	1.78e-22	4.37e-20	yes	female
CG6071	95.0631	3.58	1.8393	0.188691	9.74764	1.89e-22	4.55e-20	yes	female
Lsp2	7888.95	5.14	2.36243	0.243194	9.71419	2.62e-22	6.2e-20	yes	female
Idgf3	890.722	2.24	1.16586	0.120113	9.70637	2.83e-22	6.57e-20	yes	female
GstD1	8128.24	2.07	1.05251	0.108704	9.68231	3.59e-22	8.16e-20	yes	female
Listericin	928.884	5.32	2.41091	0.249506	9.66274	4.34e-22	9.7e-20	yes	female
CG5177	2408.8	1.8	0.85196	0.0885409	9.62222	6.44e-22	1.41e-19	yes	female
CG9689	2574.4	3.26	1.70652	0.179051	9.53087	1.56e-21	3.36e-19	yes	female
Rh5	4801.31	2.15	1.1019	0.116707	9.44162	3.67e-21	7.78e-19	yes	female
Pop2	1652.18	0.61	-0.724174	0.0767678	-9.4333	3.97e-21	8.28e-19	yes	female
Obp47a	49.822	0.19	-2.41213	0.255947	-9.42432	4.33e-21	8.86e-19	yes	female
NAAT1	1727.59	2.2	1.13612	0.121277	9.36796	7.39e-21	1.49e-18	yes	female
CG7997	897.345	2.56	1.35359	0.14498	9.33641	9.97e-21	1.97e-18	yes	female
hll	965.266	6.67	2.73758	0.297528	9.20108	3.54e-20	6.91e-18	yes	female
GstE11	275.783	2.44	1.28653	0.140752	9.14046	6.22e-20	1.19e-17	yes	female
CG2010	896.083	0.51	-0.976443	0.107021	-9.12389	7.25e-20	1.37e-17	yes	female
lectin-28C	750.724	3.09	1.62993	0.179316	9.08968	9.93e-20	1.85e-17	yes	female
Hsp70Bbb	201.903	4.56	2.19026	0.242226	9.04221	1.54e-19	2.82e-17	yes	female
CG3604	194.293	2.49	1.31511	0.146091	9.00201	2.22e-19	4e-17	yes	female
Cht4	14.7206	0.16	-2.6672	0.296688	-8.98993	2.47e-19	4.41e-17	yes	female
CG6912	1175.27	0.4	-1.31412	0.147185	-8.92833	4.32e-19	7.59e-17	yes	female
dob	150.713	3.25	1.70043	0.19053	8.92473	4.47e-19	7.73e-17	yes	female
CG14406	37.7687	6.23	2.6402	0.295921	8.92197	4.58e-19	7.82e-17	yes	female
CG10621	3735.32	3.28	1.71304	0.19318	8.8676	7.47e-19	1.26e-16	yes	female
MtnA	3250.03	2.92	1.5462	0.174522	8.85963	8.03e-19	1.33e-16	yes	female
Ncc69	7827.81	1.48	0.560789	0.0639804	8.76501	1.87e-18	3.06e-16	yes	female
Cyp6a23	1680.86	0.38	-1.38681	0.15828	-8.7618	1.92e-18	3.07e-16	yes	female
Idgf1	998.19	2.41	1.27112	0.145051	8.76326	1.9e-18	3.07e-16	yes	female
CG7720	6254.02	0.43	-1.22823	0.140455	-8.74461	2.24e-18	3.53e-16	yes	female
CG13937	1167.54	0.4	-1.32217	0.151638	-8.71922	2.8e-18	4.36e-16	yes	female
CG43202	151.235	4.5	2.16896	0.249505	8.69307	3.53e-18	5.42e-16	yes	female
CR45923	31.2641	6	2.58456	0.297747	8.68039	3.94e-18	5.98e-16	yes	female
TRAM	1487.73	1.73	0.792243	0.0916802	8.64138	5.55e-18	8.32e-16	yes	female
CG15784	5122.99	2.06	1.04281	0.120785	8.63363	5.94e-18	8.8e-16	yes	female
Or49b	38.4034	0.22	-2.20439	0.255386	-8.63158	6.05e-18	8.85e-16	yes	female
Cht8	42.4674	0.18	-2.4491	0.284903	-8.59624	8.24e-18	1.19e-15	yes	female
CG15065	2158.44	4.03	2.01205	0.234303	8.5874	8.9e-18	1.27e-15	yes	female
CG17684	3761.02	0.64	-0.643619	0.0749843	-8.58338	9.21e-18	1.29e-15	yes	female
VepD	211.411	0.4	-1.30879	0.15246	-8.58446	9.13e-18	1.29e-15	yes	female
CG30151	586.125	2.03	1.02146	0.119419	8.55358	1.19e-17	1.65e-15	yes	female
Tsp42Eh	218.267	3.16	1.65783	0.193866	8.55144	1.22e-17	1.66e-15	yes	female
CG3902	4483.26	2.1	1.06739	0.125007	8.53864	1.36e-17	1.83e-15	yes	female
eEF1beta	6357.51	2.21	1.14356	0.134098	8.52784	1.49e-17	1.99e-15	yes	female
snoRNA:Psi28S-3316a	382.604	0.27	-1.88767	0.221838	-8.50923	1.75e-17	2.31e-15	yes	female
NimB5	690.307	1.95	0.965494	0.113906	8.47626	2.33e-17	3.04e-15	yes	female
CG9344	120.824	3.41	1.77108	0.209445	8.45606	2.77e-17	3.58e-15	yes	female
CG10178	9691.86	0.64	-0.65375	0.0773422	-8.45269	2.85e-17	3.64e-15	yes	female
EbpIII	58497.2	2	1.00041	0.118727	8.42613	3.57e-17	4.53e-15	yes	female
CG18067	14540.6	3.45	1.78688	0.212724	8.40001	4.46e-17	5.6e-15	yes	female
CG17107	313.725	3.48	1.80022	0.21622	8.32587	8.37e-17	1.04e-14	yes	female
whd	6273.86	1.85	0.890284	0.106952	8.32415	8.49e-17	1.04e-14	yes	female
Ance-2	118.761	2.72	1.44561	0.174271	8.29518	1.08e-16	1.32e-14	yes	female
CG7906	544.773	0.38	-1.40322	0.169191	-8.29368	1.1e-16	1.32e-14	yes	female
GstD5	37.8395	4.95	2.30731	0.278787	8.27625	1.27e-16	1.52e-14	yes	female
CR44645	199.654	3.02	1.59507	0.193517	8.24252	1.69e-16	1.99e-14	yes	female
CG4476	121.464	0.37	-1.42432	0.173932	-8.18897	2.63e-16	3.08e-14	yes	female
CG4757	424.778	2.51	1.33039	0.162655	8.17921	2.86e-16	3.31e-14	yes	female
Hsp70Bc	221.647	3.38	1.75768	0.215633	8.15125	3.6e-16	4.14e-14	yes	female
GstE8	133.486	3.18	1.66917	0.20607	8.10003	5.49e-16	6.25e-14	yes	female
CG1354	1539.79	1.9	0.928962	0.114956	8.08105	6.42e-16	7.17e-14	yes	female
Cpr47Ee	689.646	1.59	0.669068	0.082794	8.08112	6.42e-16	7.17e-14	yes	female
Obp99a	357.339	5.25	2.39362	0.297732	8.03951	9.02e-16	9.98e-14	yes	female
CG8925	754.312	0.46	-1.12414	0.140557	-7.99777	1.27e-15	1.39e-13	yes	female
CG5612	581.216	2.23	1.15519	0.144684	7.98425	1.41e-15	1.52e-13	yes	female
rdo	2627.1	0.61	-0.71139	0.0890942	-7.9847	1.41e-15	1.52e-13	yes	female
Kmn1	110.624	3.86	1.95009	0.24474	7.968	1.61e-15	1.72e-13	yes	female
CG18547	282.831	3.42	1.7722	0.222488	7.9654	1.65e-15	1.73e-13	yes	female
Hsp67Bc	370.554	2.19	1.12927	0.141749	7.96668	1.63e-15	1.73e-13	yes	female
CG4335	431.065	2.9	1.53408	0.192761	7.95847	1.74e-15	1.81e-13	yes	female
CG17760	189.322	0.35	-1.5142	0.190527	-7.94746	1.9e-15	1.97e-13	yes	female
cora	5458	1.56	0.644165	0.0811864	7.93439	2.12e-15	2.17e-13	yes	female
phu	554.451	0.37	-1.43671	0.181281	-7.92533	2.28e-15	2.31e-13	yes	female
CG31673	813.697	1.81	0.858814	0.108436	7.92002	2.37e-15	2.39e-13	yes	female
CG11905	30.3352	4.19	2.06642	0.261691	7.89639	2.87e-15	2.84e-13	yes	female
CG5254	4742.95	0.47	-1.0785	0.136568	-7.89717	2.85e-15	2.84e-13	yes	female
bic	8972.4	1.75	0.808007	0.102515	7.88181	3.23e-15	3.17e-13	yes	female
CR45388	60.2636	3.3	1.72448	0.219018	7.87369	3.44e-15	3.36e-13	yes	female
vir-1	12991.4	1.88	0.913803	0.116184	7.86517	3.69e-15	3.57e-13	yes	female
CG7084	3021.64	0.66	-0.595849	0.0757993	-7.86087	3.81e-15	3.66e-13	yes	female
CG6287	5448.49	2.1	1.0725	0.136644	7.84883	4.2e-15	4e-13	yes	female
CR45045	132.125	4.92	2.29921	0.293086	7.84483	4.34e-15	4.1e-13	yes	female
CG15368	41.6984	4.43	2.14639	0.273831	7.83838	4.56e-15	4.28e-13	yes	female
CR44042	101.578	0.32	-1.6581	0.211592	-7.8363	4.64e-15	4.32e-13	yes	female
Cpr76Bc	232.109	0.43	-1.21051	0.154754	-7.82218	5.19e-15	4.8e-13	yes	female
Nab2	808.866	0.2	-2.34611	0.300148	-7.8165	5.43e-15	4.98e-13	yes	female
CG13062	63.3322	0.32	-1.66205	0.212793	-7.81063	5.69e-15	5.17e-13	yes	female
CG31678	3781.35	0.48	-1.073	0.137388	-7.81004	5.72e-15	5.17e-13	yes	female
CR45144	26.9845	4.66	2.21922	0.284197	7.80873	5.78e-15	5.18e-13	yes	female
CG16743	198.277	2.18	1.12158	0.143729	7.80344	6.02e-15	5.36e-13	yes	female
CG31793	1975.71	1.7	0.762249	0.097899	7.78608	6.91e-15	6.11e-13	yes	female
Edg91	117.337	3.02	1.59296	0.204649	7.78387	7.03e-15	6.17e-13	yes	female
Drip	4237.04	0.62	-0.701119	0.0901151	-7.78027	7.24e-15	6.31e-13	yes	female
CG42336	380.118	2.4	1.26242	0.162903	7.74951	9.22e-15	7.98e-13	yes	female
Hsp27	231.347	3.27	1.71135	0.220867	7.74832	9.31e-15	8e-13	yes	female
CG4461	582.204	2.02	1.01666	0.131377	7.73849	1.01e-14	8.58e-13	yes	female
CG12484	4299.46	0.53	-0.922614	0.119346	-7.7306	1.07e-14	9.07e-13	yes	female
Spn31A	166.756	2.25	1.17229	0.151716	7.72689	1.1e-14	9.27e-13	yes	female
Tes	607.681	0.61	-0.719828	0.0933438	-7.71158	1.24e-14	1.04e-12	yes	female
IM23	1566.97	3.41	1.76782	0.229585	7.70008	1.36e-14	1.13e-12	yes	female
CG8745	4287.79	0.57	-0.802181	0.104244	-7.69521	1.41e-14	1.16e-12	yes	female
Phk-3	859.223	1.96	0.972007	0.127442	7.62704	2.4e-14	1.97e-12	yes	female
Obp56a	552.114	2.87	1.52107	0.199953	7.60713	2.8e-14	2.28e-12	yes	female
CG17264	864.248	0.46	-1.13099	0.148698	-7.60593	2.83e-14	2.29e-12	yes	female
CG31211	2029.33	0.57	-0.815799	0.107358	-7.59889	2.99e-14	2.39e-12	yes	female
CG43134	17.0929	0.21	-2.27142	0.298935	-7.59839	3e-14	2.39e-12	yes	female
Cpr50Cb	467.625	0.3	-1.73438	0.228461	-7.59158	3.16e-14	2.51e-12	yes	female
CG12116	3138.58	1.9	0.923493	0.122128	7.56165	3.98e-14	3.13e-12	yes	female
hgo	1184.8	2.9	1.53741	0.203405	7.55839	4.08e-14	3.17e-12	yes	female
Idgf6	5386.55	2.17	1.11674	0.147726	7.55955	4.04e-14	3.17e-12	yes	female
CG1667	3393.38	0.47	-1.09341	0.144803	-7.55105	4.32e-14	3.34e-12	yes	female
CG33458	101.018	0.3	-1.7375	0.230281	-7.54511	4.52e-14	3.47e-12	yes	female
CG15803	781.427	0.38	-1.39592	0.185522	-7.52425	5.3e-14	4.05e-12	yes	female
CG30090	56.4495	3.47	1.79541	0.239393	7.49983	6.39e-14	4.85e-12	yes	female
CG3502	37.8118	4.09	2.0317	0.271014	7.49666	6.55e-14	4.93e-12	yes	female
CG5707	977.351	1.98	0.98251	0.13185	7.45175	9.21e-14	6.9e-12	yes	female
CG11236	608.296	2	0.997365	0.133945	7.44607	9.62e-14	7.15e-12	yes	female
Sec61alpha	3945.76	1.71	0.770197	0.103445	7.44544	9.66e-14	7.15e-12	yes	female
Cyp4p1	1460.46	3.23	1.68932	0.227216	7.43487	1.05e-13	7.7e-12	yes	female
CG1441	1331.23	2.22	1.14762	0.154617	7.42231	1.15e-13	8.42e-12	yes	female
Mgstl	2210.1	1.93	0.950089	0.128391	7.39996	1.36e-13	9.9e-12	yes	female
ine	2081.38	0.67	-0.575352	0.0778629	-7.38929	1.48e-13	1.07e-11	yes	female
CG17707	3195.48	0.46	-1.12862	0.152986	-7.37728	1.62e-13	1.15e-11	yes	female
Tret1-2	82.0727	2.64	1.403	0.190174	7.37747	1.61e-13	1.15e-11	yes	female
L2HGDH	1611.24	1.42	0.507982	0.0688724	7.37569	1.63e-13	1.16e-11	yes	female
Cad86C	985.812	0.62	-0.685086	0.0929412	-7.37117	1.69e-13	1.19e-11	yes	female
CG11796	10193.7	2.58	1.36464	0.185115	7.37186	1.68e-13	1.19e-11	yes	female
CG31955	321.521	2.19	1.12925	0.153325	7.36511	1.77e-13	1.24e-11	yes	female
CG14132	741.687	0.54	-0.885725	0.120369	-7.35842	1.86e-13	1.29e-11	yes	female
U4-U6-60K	648.513	1.55	0.62922	0.0856772	7.34408	2.07e-13	1.43e-11	yes	female
LManII	6213.89	2.03	1.01893	0.138986	7.33113	2.28e-13	1.57e-11	yes	female
CG9509	120.901	3.07	1.61861	0.220875	7.32816	2.33e-13	1.59e-11	yes	female
fbp	3020.44	2.09	1.06016	0.144712	7.32601	2.37e-13	1.61e-11	yes	female
Mtp	1241.35	1.88	0.909207	0.124113	7.32565	2.38e-13	1.61e-11	yes	female
Cyp6a9	1676.37	2.05	1.03782	0.141788	7.31947	2.49e-13	1.67e-11	yes	female
AdamTS-A	2366.51	0.58	-0.775674	0.105992	-7.3182	2.51e-13	1.68e-11	yes	female
CG10184	1035.51	2.24	1.16324	0.159777	7.2804	3.33e-13	2.2e-11	yes	female
CG9743	869.764	1.65	0.721932	0.0991624	7.2803	3.33e-13	2.2e-11	yes	female
Fs	3765.68	1.37	0.45181	0.0620841	7.27738	3.4e-13	2.24e-11	yes	female
CG44325	3048.27	2.11	1.07798	0.14818	7.27482	3.47e-13	2.27e-11	yes	female
Sod2	3022.33	1.68	0.74562	0.102649	7.26378	3.76e-13	2.45e-11	yes	female
CG30059	15.9423	4.43	2.14798	0.295955	7.25779	3.93e-13	2.54e-11	yes	female
Adh	2469.87	1.92	0.938316	0.129686	7.2353	4.65e-13	2.99e-11	yes	female
Acox57D-d	195.444	1.91	0.931777	0.128888	7.22933	4.85e-13	3.11e-11	yes	female
CG30154	201.214	2.87	1.52066	0.210428	7.2265	4.96e-13	3.16e-11	yes	female
IM2	15499.7	2.23	1.15384	0.159864	7.21765	5.29e-13	3.35e-11	yes	female
CR43242	636.417	0.61	-0.702021	0.0978043	-7.17781	7.08e-13	4.46e-11	yes	female
List	1719.53	0.64	-0.651617	0.0907956	-7.17675	7.14e-13	4.48e-11	yes	female
yip2	6983.89	1.51	0.59138	0.0826108	7.15863	8.15e-13	5.08e-11	yes	female
PGRP-SB1	2519.13	1.83	0.873254	0.122237	7.14395	9.07e-13	5.63e-11	yes	female
CG1139	25.2806	0.26	-1.94977	0.273047	-7.14076	9.28e-13	5.73e-11	yes	female
CG13071	1104.65	0.53	-0.908747	0.127282	-7.13961	9.36e-13	5.75e-11	yes	female
Elp2	699.937	1.68	0.745305	0.104498	7.13222	9.88e-13	6.04e-11	yes	female
CG12868	568.054	1.85	0.889977	0.124873	7.12705	1.03e-12	6.18e-11	yes	female
CG34244	31.3671	3.65	1.8682	0.26211	7.12755	1.02e-12	6.18e-11	yes	female
CG7149	2593.86	0.69	-0.52829	0.0741229	-7.12722	1.02e-12	6.18e-11	yes	female
CG5493	1062.39	1.91	0.936745	0.131655	7.11515	1.12e-12	6.7e-11	yes	female
CG34445	106.602	3.32	1.73242	0.243728	7.10801	1.18e-12	6.99e-11	yes	female
Irp-1B	4767.29	2.26	1.17646	0.165506	7.10822	1.18e-12	6.99e-11	yes	female
CG5966	6959.84	3.2	1.67598	0.23606	7.09978	1.25e-12	7.38e-11	yes	female
CG4576	571.385	0.47	-1.07978	0.152403	-7.08502	1.39e-12	8.17e-11	yes	female
NT5E-2	685.824	1.84	0.876101	0.124044	7.06283	1.63e-12	9.55e-11	yes	female
CG14439	3589.38	1.51	0.592683	0.0840621	7.05054	1.78e-12	1.04e-10	yes	female
trol	29479.7	0.57	-0.804659	0.114203	-7.04586	1.84e-12	1.07e-10	yes	female
a	1516.76	0.68	-0.549921	0.0781959	-7.0326	2.03e-12	1.16e-10	yes	female
CG14105	316.776	2.93	1.55315	0.220801	7.03416	2e-12	1.16e-10	yes	female
CG43071	76.8068	3.25	1.70168	0.242891	7.00592	2.45e-12	1.4e-10	yes	female
Gcn5	1091.54	0.56	-0.83939	0.119805	-7.00629	2.45e-12	1.4e-10	yes	female
Yp1	45320.8	4.25	2.08851	0.298166	7.0045	2.48e-12	1.4e-10	yes	female
caps	4928.27	1.3	0.383311	0.0548427	6.98927	2.76e-12	1.55e-10	yes	female
wb	1765.54	0.53	-0.910676	0.130281	-6.99008	2.75e-12	1.55e-10	yes	female
CG32695	461.719	2.45	1.29159	0.185022	6.98075	2.94e-12	1.64e-10	yes	female
CG5791	811.128	2.75	1.45928	0.209367	6.96996	3.17e-12	1.76e-10	yes	female
CG1774	798.331	1.93	0.948475	0.136188	6.96443	3.3e-12	1.82e-10	yes	female
AsnS	2710.43	1.74	0.797547	0.114567	6.96142	3.37e-12	1.86e-10	yes	female
CG15611	933.75	1.64	0.716867	0.103024	6.95823	3.45e-12	1.89e-10	yes	female
SmB	262.936	2.63	1.39684	0.200796	6.95655	3.49e-12	1.9e-10	yes	female
tej	85.095	0.41	-1.29061	0.185789	-6.94664	3.74e-12	2.03e-10	yes	female
GstE9	4122.95	2.15	1.10534	0.159179	6.94401	3.81e-12	2.06e-10	yes	female
SsRbeta	1709.95	1.86	0.893621	0.129158	6.91884	4.55e-12	2.45e-10	yes	female
CR45174	47.2264	0.27	-1.87944	0.271696	-6.91745	4.6e-12	2.47e-10	yes	female
CG5778	451.389	2.25	1.17285	0.169713	6.91078	4.82e-12	2.57e-10	yes	female
CG10947	1399.85	0.65	-0.624881	0.0904947	-6.90517	5.01e-12	2.67e-10	yes	female
Gnmt	853.962	4.04	2.01331	0.291711	6.90172	5.14e-12	2.72e-10	yes	female
GEFmeso	1631.62	0.54	-0.882886	0.12835	-6.87875	6.04e-12	3.18e-10	yes	female
CG11317	1429.57	0.71	-0.500766	0.0731175	-6.84878	7.45e-12	3.91e-10	yes	female
CG33267	19.8224	3.96	1.98624	0.290034	6.84829	7.47e-12	3.91e-10	yes	female
Spn27A	4118.3	1.54	0.623926	0.0912407	6.83825	8.02e-12	4.17e-10	yes	female
lectin-37Da	11.4115	0.25	-2.01512	0.29482	-6.8351	8.19e-12	4.25e-10	yes	female
Ance-4	803.434	3.27	1.70828	0.25015	6.82903	8.55e-12	4.41e-10	yes	female
Ilp3	663.334	2.14	1.09716	0.160825	6.8221	8.97e-12	4.61e-10	yes	female
shf	697.979	0.56	-0.831579	0.121911	-6.8212	9.03e-12	4.62e-10	yes	female
AdSL	3068.87	1.75	0.80799	0.119044	6.78733	1.14e-11	5.82e-10	yes	female
Ms	1956.78	1.53	0.610936	0.0903482	6.76202	1.36e-11	6.91e-10	yes	female
Cyp6a2	3010.89	1.97	0.978112	0.144773	6.75619	1.42e-11	7.16e-10	yes	female
Lsp1gamma	1660.3	0.47	-1.07628	0.159798	-6.73521	1.64e-11	8.24e-10	yes	female
Nmdmc	2606.65	2.6	1.37737	0.204547	6.73378	1.65e-11	8.29e-10	yes	female
Spn88Eb	558.048	2.82	1.49694	0.222994	6.71293	1.91e-11	9.53e-10	yes	female
fit	1303.72	3.5	1.80715	0.269281	6.71103	1.93e-11	9.61e-10	yes	female
Crz	348.415	2.08	1.05395	0.157299	6.70032	2.08e-11	1.03e-09	yes	female
CG15353	61.6293	3.23	1.69071	0.252478	6.69644	2.14e-11	1.05e-09	yes	female
CG32687	3417.94	1.4	0.483324	0.072405	6.67529	2.47e-11	1.21e-09	yes	female
CG9150	94.955	3.19	1.67214	0.251025	6.66123	2.72e-11	1.33e-09	yes	female
CG2121	1879.76	0.68	-0.546844	0.0821274	-6.65848	2.77e-11	1.35e-09	yes	female
CG12512	1679.21	1.82	0.865124	0.130078	6.65082	2.91e-11	1.42e-09	yes	female
CG14221	332.443	0.44	-1.17229	0.176365	-6.64697	2.99e-11	1.45e-09	yes	female
CG16935	1891.55	1.51	0.595269	0.0898369	6.62611	3.45e-11	1.66e-09	yes	female
CG15322	41.8427	2.86	1.51463	0.229595	6.59698	4.2e-11	2.01e-09	yes	female
CG1544	1432.46	1.69	0.755142	0.114493	6.59553	4.24e-11	2.03e-09	yes	female
CG9572	1783.19	1.69	0.757372	0.115053	6.58283	4.62e-11	2.2e-09	yes	female
CG13806	10.5862	0.27	-1.86334	0.283246	-6.57853	4.75e-11	2.25e-09	yes	female
CG30427	532.307	1.85	0.89091	0.13545	6.5774	4.79e-11	2.26e-09	yes	female
CG4670	3557.54	1.53	0.614383	0.0939035	6.5427	6.04e-11	2.84e-09	yes	female
CG5849	337.965	2.58	1.36915	0.209336	6.54044	6.13e-11	2.88e-09	yes	female
CG18641	228.935	0.49	-1.0401	0.15932	-6.52833	6.65e-11	3.11e-09	yes	female
glob1	4797.64	2.03	1.02176	0.157097	6.50402	7.82e-11	3.64e-09	yes	female
CG18327	164.943	0.45	-1.13675	0.174861	-6.50091	7.98e-11	3.7e-09	yes	female
CG5999	375.501	3.85	1.94512	0.29957	6.49303	8.41e-11	3.87e-09	yes	female
lbm	509.361	1.93	0.947155	0.145874	6.49297	8.42e-11	3.87e-09	yes	female
CG14304	300.784	0.47	-1.08998	0.168053	-6.48594	8.82e-11	4.04e-09	yes	female
CG2772	382.051	0.31	-1.69347	0.261111	-6.48564	8.84e-11	4.04e-09	yes	female
CR45350	93.5819	2.14	1.09549	0.169676	6.45632	1.07e-10	4.88e-09	yes	female
Ilp5	192.088	1.97	0.975469	0.151181	6.45233	1.1e-10	4.99e-09	yes	female
CG9547	706.852	2.06	1.04273	0.161652	6.45042	1.12e-10	5.04e-09	yes	female
FK506-bp2	2868.01	1.49	0.580085	0.0899482	6.4491	1.13e-10	5.06e-09	yes	female
IM14	5400.5	2.32	1.21488	0.188414	6.44796	1.13e-10	5.08e-09	yes	female
snoRNA:Psi18S-1389a	1357.15	2.7	1.43485	0.222627	6.44509	1.16e-10	5.16e-09	yes	female
CG18853	35.0086	3.78	1.91983	0.298124	6.43971	1.2e-10	5.33e-09	yes	female
CG6836	1101.44	1.87	0.90681	0.141008	6.43091	1.27e-10	5.63e-09	yes	female
Rab32	15096.9	0.64	-0.648416	0.100868	-6.42833	1.29e-10	5.7e-09	yes	female
Dhc93AB	1325.11	0.53	-0.910459	0.141765	-6.42231	1.34e-10	5.91e-09	yes	female
CG13116	688.94	1.66	0.731508	0.114704	6.37736	1.8e-10	7.91e-09	yes	female
CG6746	1042.87	2.08	1.05982	0.166269	6.37411	1.84e-10	8.05e-09	yes	female
CG5991	1538.56	1.7	0.768312	0.120558	6.37297	1.85e-10	8.08e-09	yes	female
CG31862	35.6948	3.41	1.76862	0.278164	6.35819	2.04e-10	8.86e-09	yes	female
CG32706	21.928	3.71	1.88987	0.297267	6.35751	2.05e-10	8.87e-09	yes	female
CG34396	932.782	1.72	0.778916	0.12304	6.33057	2.44e-10	1.05e-08	yes	female
CG11658	4942.66	0.53	-0.921613	0.145612	-6.32924	2.46e-10	1.06e-08	yes	female
CG12655	393.885	2.11	1.07527	0.170251	6.31581	2.69e-10	1.15e-08	yes	female
GLS	2543.29	1.61	0.682799	0.108133	6.31444	2.71e-10	1.16e-08	yes	female
Atf3	366.846	1.76	0.811596	0.128636	6.30923	2.8e-10	1.19e-08	yes	female
Adgf-A	332.389	2.62	1.38748	0.22015	6.30243	2.93e-10	1.24e-08	yes	female
CG15020	72.9971	0.4	-1.33833	0.212459	-6.29925	2.99e-10	1.26e-08	yes	female
CG13215	79.8609	0.29	-1.79668	0.285445	-6.29432	3.09e-10	1.29e-08	yes	female
Jafrac1	7070.06	1.5	0.586225	0.0931232	6.29515	3.07e-10	1.29e-08	yes	female
Tsp42Ek	352.543	1.8	0.849141	0.134916	6.29383	3.1e-10	1.29e-08	yes	female
CG8331	3088.93	1.34	0.419306	0.0666599	6.29022	3.17e-10	1.32e-08	yes	female
spirit	378.735	2.41	1.27015	0.202067	6.2858	3.26e-10	1.35e-08	yes	female
Obp56d	9871.36	2.15	1.1076	0.176393	6.27916	3.4e-10	1.41e-08	yes	female
wal	4849.13	1.82	0.865129	0.138083	6.26528	3.72e-10	1.53e-08	yes	female
CG16886	453.753	0.56	-0.837673	0.133723	-6.26422	3.75e-10	1.54e-08	yes	female
rols	1596.73	0.58	-0.78082	0.124837	-6.25473	3.98e-10	1.63e-08	yes	female
CG30371	90.0541	0.33	-1.58794	0.254277	-6.24492	4.24e-10	1.73e-08	yes	female
Sardh	549.511	3.02	1.59691	0.255766	6.24361	4.28e-10	1.74e-08	yes	female
CG6638	768.784	1.67	0.737963	0.118221	6.24224	4.31e-10	1.75e-08	yes	female
Cyp12d1-d	28.0453	3.65	1.86839	0.29965	6.23522	4.51e-10	1.82e-08	yes	female
prc	702.79	0.39	-1.34831	0.216345	-6.23223	4.6e-10	1.85e-08	yes	female
CG9336	5102.01	2.07	1.05128	0.168994	6.22082	4.95e-10	1.99e-08	yes	female
TwdlG	65.8256	0.42	-1.26831	0.203924	-6.21954	4.99e-10	2e-08	yes	female
CG30438	940.802	1.52	0.60217	0.0970882	6.2023	5.56e-10	2.22e-08	yes	female
TpnC41C	1247.57	2.01	1.00425	0.16208	6.19602	5.79e-10	2.3e-08	yes	female
CG34424	1369.78	2.47	1.30718	0.211124	6.19154	5.96e-10	2.36e-08	yes	female
CG5599	529.493	1.56	0.645105	0.10433	6.1833	6.28e-10	2.48e-08	yes	female
Cyp6t2Psi	180.836	0.46	-1.11877	0.181404	-6.16728	6.95e-10	2.73e-08	yes	female
Dhpr	1799.95	1.52	0.606284	0.0983106	6.16702	6.96e-10	2.73e-08	yes	female
CG15098	8651.36	1.76	0.813668	0.132119	6.15859	7.34e-10	2.87e-08	yes	female
CG7322	1469.65	2.6	1.3772	0.223953	6.14952	7.77e-10	3.03e-08	yes	female
CG5885	1596.41	1.83	0.868686	0.141325	6.14672	7.91e-10	3.08e-08	yes	female
CG6613	1684.2	0.68	-0.551695	0.0897808	-6.14491	8e-10	3.1e-08	yes	female
smp-30	2901.33	2.38	1.25384	0.204264	6.13833	8.34e-10	3.22e-08	yes	female
CG14015	993.915	0.67	-0.57506	0.0937402	-6.13461	8.54e-10	3.29e-08	yes	female
CG34347	1609.84	0.58	-0.786519	0.128255	-6.13245	8.65e-10	3.32e-08	yes	female
Etf-QO	4139.57	1.48	0.566478	0.0926736	6.11262	9.8e-10	3.75e-08	yes	female
MFS16	1619.92	1.46	0.545652	0.0893775	6.10503	1.03e-09	3.92e-08	yes	female
Pdi	10405.4	1.54	0.621988	0.10196	6.10032	1.06e-09	4.03e-08	yes	female
CG43114	294.201	3.22	1.68589	0.276586	6.09536	1.09e-09	4.14e-08	yes	female
CR43283	55.5723	3.03	1.59872	0.262488	6.09063	1.12e-09	4.25e-08	yes	female
CG11425	1015.42	2.16	1.11347	0.182895	6.08805	1.14e-09	4.31e-08	yes	female
CG9631	1468.46	1.68	0.746381	0.122626	6.08662	1.15e-09	4.33e-08	yes	female
Cyp4c3	672.914	0.62	-0.695285	0.114387	-6.07838	1.21e-09	4.55e-08	yes	female
CR45997	36.0508	0.32	-1.63184	0.268582	-6.07575	1.23e-09	4.61e-08	yes	female
CG14696	1209.88	0.54	-0.884558	0.145922	-6.06183	1.35e-09	5.01e-08	yes	female
Rgk1	2515.42	1.75	0.805455	0.132909	6.06018	1.36e-09	5.05e-08	yes	female
Myo95E	2771.9	0.75	-0.423896	0.0700556	-6.05085	1.44e-09	5.33e-08	yes	female
pug	8028.61	1.92	0.940675	0.155516	6.04873	1.46e-09	5.39e-08	yes	female
CG32694	254.153	2.48	1.31277	0.217222	6.04343	1.51e-09	5.55e-08	yes	female
Cpr72Ec	2787.89	1.67	0.740287	0.122545	6.04092	1.53e-09	5.62e-08	yes	female
Mppe	4571.53	1.51	0.597754	0.0991274	6.03016	1.64e-09	5.99e-08	yes	female
CG2064	287.457	2.52	1.33486	0.221423	6.02854	1.65e-09	6.03e-08	yes	female
CG2837	311.32	2.02	1.01547	0.168467	6.02771	1.66e-09	6.05e-08	yes	female
CG12262	6511.21	1.65	0.723802	0.12011	6.02613	1.68e-09	6.09e-08	yes	female
Cyp313a1	9609.29	0.71	-0.499601	0.0829489	-6.023	1.71e-09	6.19e-08	yes	female
Tapdelta	825.069	1.54	0.623298	0.103533	6.02029	1.74e-09	6.27e-08	yes	female
CG11672	10.9237	0.3	-1.73041	0.28764	-6.01587	1.79e-09	6.43e-08	yes	female
CG4408	131.365	3.13	1.64484	0.273956	6.00404	1.92e-09	6.89e-08	yes	female
eater	406.569	1.74	0.801101	0.133466	6.00227	1.95e-09	6.95e-08	yes	female
AspRS	2948.55	1.47	0.553979	0.0923314	5.99989	1.97e-09	7.03e-08	yes	female
CG10361	845.798	1.96	0.973522	0.16228	5.99901	1.99e-09	7.05e-08	yes	female
CG2915	996.664	1.65	0.721166	0.12025	5.99721	2.01e-09	7.11e-08	yes	female
Shmt	7457.11	2.18	1.122	0.187224	5.9928	2.06e-09	7.28e-08	yes	female
CG11151	3115.07	1.68	0.744865	0.124364	5.98939	2.11e-09	7.42e-08	yes	female
CG6664	2708.96	0.65	-0.612801	0.102435	-5.98231	2.2e-09	7.72e-08	yes	female
Hsp23	2153.01	2.56	1.35361	0.226546	5.97501	2.3e-09	8.05e-08	yes	female
firl	1028.48	0.68	-0.553682	0.0926852	-5.9738	2.32e-09	8.09e-08	yes	female
Yp2	28983.4	3.18	1.66818	0.279695	5.96428	2.46e-09	8.55e-08	yes	female
Ccp84Ag	46.1466	0.31	-1.6764	0.281285	-5.9598	2.53e-09	8.77e-08	yes	female
Tsp42Eo	48.3725	2.56	1.35639	0.227784	5.95473	2.61e-09	9.02e-08	yes	female
CG6767	5488.92	1.5	0.582466	0.0979284	5.94788	2.72e-09	9.38e-08	yes	female
AttA	1648.92	3.42	1.77594	0.298716	5.94526	2.76e-09	9.42e-08	yes	female
Idh	20258	1.65	0.722618	0.121548	5.94514	2.76e-09	9.42e-08	yes	female
IM3	11338.1	2.03	1.0245	0.172297	5.9461	2.75e-09	9.42e-08	yes	female
l(3)72Dp	782.992	1.57	0.649728	0.109293	5.94483	2.77e-09	9.42e-08	yes	female
Prx2540-1	1017.54	0.42	-1.25132	0.210466	-5.94546	2.76e-09	9.42e-08	yes	female
CG30395	20.0661	3.28	1.71156	0.288274	5.93726	2.9e-09	9.84e-08	yes	female
Cyp1	12324.1	1.76	0.812831	0.136992	5.93342	2.97e-09	1e-07	yes	female
CG10433	1222.94	2.52	1.33588	0.225296	5.92945	3.04e-09	1.03e-07	yes	female
CG42235	2428.28	0.65	-0.620675	0.10472	-5.92702	3.08e-09	1.04e-07	yes	female
Nnf1b	27.4783	2.94	1.55544	0.262707	5.92082	3.2e-09	1.08e-07	yes	female
ADPS	758.796	0.49	-1.0255	0.173301	-5.91745	3.27e-09	1.09e-07	yes	female
Idgf4	11544	1.37	0.453798	0.0767355	5.9138	3.34e-09	1.12e-07	yes	female
CR44442	91.5847	0.38	-1.38934	0.235138	-5.90859	3.45e-09	1.15e-07	yes	female
CG11686	197.552	2.01	1.0042	0.169999	5.90706	3.48e-09	1.16e-07	yes	female
DMAP1	346.423	0.53	-0.908103	0.153772	-5.9055	3.52e-09	1.16e-07	yes	female
CG4325	487.984	0.64	-0.63869	0.108297	-5.89756	3.69e-09	1.22e-07	yes	female
NijC	1747.46	0.48	-1.0593	0.179761	-5.89284	3.8e-09	1.25e-07	yes	female
Cpr50Ca	33.3237	0.35	-1.50004	0.254829	-5.88645	3.95e-09	1.29e-07	yes	female
Gale	5979.04	1.61	0.690214	0.11726	5.8862	3.95e-09	1.29e-07	yes	female
crim	237.887	1.75	0.80684	0.137287	5.87702	4.18e-09	1.37e-07	yes	female
CG11368	4100.3	2.02	1.01675	0.173276	5.86777	4.42e-09	1.44e-07	yes	female
CG32392	215.564	0.59	-0.767674	0.130869	-5.86597	4.47e-09	1.44e-07	yes	female
l(3)mbn	3221.18	0.38	-1.38139	0.235489	-5.86606	4.46e-09	1.44e-07	yes	female
Obp56e	10222.1	2.23	1.15782	0.197303	5.86826	4.4e-09	1.44e-07	yes	female
PGRP-LE	675.936	0.61	-0.712989	0.121615	-5.86265	4.56e-09	1.47e-07	yes	female
CG7900	648.926	1.96	0.970579	0.165711	5.85706	4.71e-09	1.52e-07	yes	female
CG6067	1237.84	1.66	0.733359	0.125409	5.84774	4.98e-09	1.6e-07	yes	female
CG43402	291.095	2.7	1.43039	0.244691	5.8457	5.04e-09	1.61e-07	yes	female
CG33459	35.1363	0.36	-1.47924	0.253081	-5.84493	5.07e-09	1.62e-07	yes	female
Tsp42El	1812.15	1.5	0.587977	0.100617	5.84374	5.1e-09	1.62e-07	yes	female
CG31100	1587.33	0.57	-0.809635	0.138655	-5.83919	5.25e-09	1.67e-07	yes	female
Obp57a	774.523	1.97	0.974649	0.166967	5.83739	5.3e-09	1.68e-07	yes	female
CG3223	3253.9	0.57	-0.812347	0.139377	-5.82843	5.59e-09	1.76e-07	yes	female
Gbp2	3588.33	1.46	0.547072	0.0938508	5.82916	5.57e-09	1.76e-07	yes	female
CG6357	7658.56	1.55	0.630778	0.108282	5.82534	5.7e-09	1.79e-07	yes	female
EloB	1930.02	1.33	0.409745	0.0704084	5.81955	5.9e-09	1.85e-07	yes	female
Rpt6R	712.001	0.45	-1.16348	0.200182	-5.81209	6.17e-09	1.93e-07	yes	female
Kank	6089.78	0.72	-0.476622	0.0820384	-5.80974	6.26e-09	1.95e-07	yes	female
Faa	1622.01	1.81	0.857135	0.147584	5.80779	6.33e-09	1.97e-07	yes	female
CG12171	835.449	1.73	0.79185	0.136491	5.80149	6.57e-09	2.04e-07	yes	female
FASN1	32489.2	1.56	0.639795	0.110408	5.79483	6.84e-09	2.12e-07	yes	female
CG34054	132.001	2.48	1.31162	0.226529	5.79006	7.04e-09	2.17e-07	yes	female
Cyp4s3	1929.38	0.55	-0.854813	0.14776	-5.78513	7.25e-09	2.23e-07	yes	female
CG8012	1806.48	2.14	1.10003	0.19041	5.7772	7.6e-09	2.33e-07	yes	female
CG30203	471.997	1.6	0.681737	0.118058	5.7746	7.71e-09	2.36e-07	yes	female
CG7966	1032.69	1.9	0.926961	0.160523	5.77462	7.71e-09	2.36e-07	yes	female
CG5793	1471.03	1.96	0.971607	0.168451	5.7679	8.03e-09	2.45e-07	yes	female
Arc2	204.381	1.89	0.920621	0.159679	5.76545	8.14e-09	2.47e-07	yes	female
DIP1	1422.93	0.7	-0.515966	0.0894859	-5.76589	8.12e-09	2.47e-07	yes	female
l(1)G0320	1153.62	1.55	0.63663	0.110465	5.76317	8.25e-09	2.5e-07	yes	female
Spp	1161.27	1.47	0.559326	0.09713	5.75853	8.49e-09	2.56e-07	yes	female
Desi	114.516	0.47	-1.07491	0.18681	-5.75404	8.71e-09	2.62e-07	yes	female
CG1545	603.966	1.67	0.740799	0.128805	5.75131	8.86e-09	2.66e-07	yes	female
CG9492	460.679	0.53	-0.904857	0.15734	-5.75098	8.87e-09	2.66e-07	yes	female
Myo61F	247.416	1.77	0.826701	0.143776	5.74994	8.93e-09	2.67e-07	yes	female
SIFaR	744.318	2.47	1.30186	0.226512	5.7474	9.06e-09	2.7e-07	yes	female
CG9171	2490.75	0.66	-0.596497	0.103851	-5.74376	9.26e-09	2.75e-07	yes	female
cbs	1054.25	1.41	0.499927	0.0870737	5.74143	9.39e-09	2.78e-07	yes	female
CG15312	1055.02	0.64	-0.649582	0.113141	-5.74135	9.39e-09	2.78e-07	yes	female
ssp7	1973.8	1.71	0.77529	0.135081	5.73943	9.5e-09	2.81e-07	yes	female
CG5653	1661.69	0.56	-0.826433	0.144215	-5.73058	1e-08	2.95e-07	yes	female
esn	710.049	0.67	-0.571714	0.0998327	-5.72672	1.02e-08	3.01e-07	yes	female
CG13950	444.621	0.52	-0.951275	0.166257	-5.7217	1.05e-08	3.09e-07	yes	female
CG1339	18.007	3.28	1.7119	0.299459	5.71664	1.09e-08	3.18e-07	yes	female
CG31777	266.441	1.99	0.994155	0.173986	5.714	1.1e-08	3.22e-07	yes	female
arr	3865.72	0.68	-0.566431	0.0991716	-5.71162	1.12e-08	3.26e-07	yes	female
CG3520	328.359	0.58	-0.788397	0.138067	-5.71024	1.13e-08	3.28e-07	yes	female
fusl	1925.13	0.72	-0.472995	0.0828584	-5.70847	1.14e-08	3.3e-07	yes	female
CG7220	4831.21	0.55	-0.862336	0.151077	-5.70792	1.14e-08	3.31e-07	yes	female
CG7135	1036.58	2.32	1.21611	0.213515	5.69566	1.23e-08	3.54e-07	yes	female
Obp99c	15892.8	1.91	0.937097	0.164697	5.68982	1.27e-08	3.65e-07	yes	female
SmydA-9	3881.21	0.43	-1.22802	0.215828	-5.68981	1.27e-08	3.65e-07	yes	female
Arc42	1364.23	1.92	0.94038	0.165321	5.68821	1.28e-08	3.67e-07	yes	female
CR44043	27.7284	0.33	-1.61612	0.284121	-5.68812	1.28e-08	3.67e-07	yes	female
Rack1	14035	1.49	0.579443	0.101992	5.68125	1.34e-08	3.81e-07	yes	female
CG15674	45.171	0.33	-1.59245	0.280427	-5.67866	1.36e-08	3.86e-07	yes	female
CG12896	622.294	0.48	-1.06551	0.187734	-5.67563	1.38e-08	3.92e-07	yes	female
amd	915.886	0.57	-0.802825	0.141607	-5.66941	1.43e-08	4.06e-07	yes	female
Elo68alpha	9.56619	3.22	1.68582	0.29742	5.66814	1.44e-08	4.08e-07	yes	female
jv	2146.5	0.51	-0.980323	0.173062	-5.66457	1.47e-08	4.15e-07	yes	female
CG10932	1380.47	1.79	0.841918	0.148699	5.66189	1.5e-08	4.21e-07	yes	female
CG34376	1007.93	1.56	0.645785	0.114087	5.66045	1.51e-08	4.24e-07	yes	female
CG7461	7817.03	1.44	0.523543	0.0925365	5.65769	1.53e-08	4.29e-07	yes	female
CG18107	2040.39	2.49	1.31369	0.232363	5.65358	1.57e-08	4.39e-07	yes	female
Acer	2826.84	0.68	-0.559637	0.0990639	-5.64926	1.61e-08	4.49e-07	yes	female
CG8642	179.602	0.4	-1.32015	0.233813	-5.64615	1.64e-08	4.56e-07	yes	female
tmod	23917.1	0.59	-0.762889	0.13517	-5.64391	1.66e-08	4.61e-07	yes	female
CG2004	1387.83	1.9	0.925671	0.164074	5.64181	1.68e-08	4.66e-07	yes	female
Zip71B	2387.22	0.56	-0.839109	0.14904	-5.63008	1.8e-08	4.97e-07	yes	female
CG6356	4920.74	0.64	-0.653694	0.116294	-5.62106	1.9e-08	5.23e-07	yes	female
CG9485	23398.3	0.58	-0.786688	0.140341	-5.60554	2.08e-08	5.71e-07	yes	female
Mco1	933.583	1.58	0.658637	0.117567	5.60224	2.12e-08	5.8e-07	yes	female
CG11089	21460.5	1.95	0.965554	0.17243	5.59968	2.15e-08	5.88e-07	yes	female
CG5402	11.3119	0.31	-1.67132	0.298908	-5.5914	2.25e-08	6.15e-07	yes	female
VGAT	4783.4	0.77	-0.36901	0.0660232	-5.58909	2.28e-08	6.22e-07	yes	female
CR43960	12.2391	3.18	1.66875	0.298733	5.58608	2.32e-08	6.31e-07	yes	female
CG1648	7492.31	1.56	0.639645	0.114606	5.58125	2.39e-08	6.48e-07	yes	female
CG34325	916.08	1.65	0.720951	0.129204	5.57996	2.41e-08	6.5e-07	yes	female
CG42370	314.379	1.83	0.870384	0.155986	5.57988	2.41e-08	6.5e-07	yes	female
CG10943	8.95145	0.32	-1.6595	0.297583	-5.5766	2.45e-08	6.61e-07	yes	female
Rgk2	1363.98	0.59	-0.759855	0.136536	-5.56524	2.62e-08	7.04e-07	yes	female
ade3	10037.7	1.83	0.867919	0.156105	5.55985	2.7e-08	7.23e-07	yes	female
CaBP1	1256.72	1.49	0.575584	0.103523	5.55994	2.7e-08	7.23e-07	yes	female
v	929.075	2.43	1.27937	0.230442	5.5518	2.83e-08	7.55e-07	yes	female
CG6415	1306.03	1.95	0.966991	0.174331	5.54686	2.91e-08	7.75e-07	yes	female
Nuf2	99.0186	0.48	-1.05668	0.190516	-5.54643	2.92e-08	7.75e-07	yes	female
CHKov1	547.399	1.55	0.633038	0.114177	5.54437	2.95e-08	7.83e-07	yes	female
IM4	3451.99	2.08	1.05516	0.19038	5.54242	2.98e-08	7.9e-07	yes	female
CG15362	91.4871	2.06	1.0431	0.188269	5.54048	3.02e-08	7.97e-07	yes	female
CecA2	520.943	2.67	1.4191	0.256392	5.53488	3.11e-08	8.21e-07	yes	female
Reep1	7834.29	0.67	-0.583248	0.105413	-5.53298	3.15e-08	8.28e-07	yes	female
PGRP-SA	561.502	2.1	1.06782	0.193099	5.52991	3.2e-08	8.41e-07	yes	female
CG6028	1508.36	1.96	0.972311	0.175882	5.5282	3.24e-08	8.48e-07	yes	female
CG15282	406.283	1.74	0.796046	0.144031	5.52692	3.26e-08	8.52e-07	yes	female
bw	2133.96	0.63	-0.66171	0.119815	-5.52277	3.34e-08	8.71e-07	yes	female
vig2	2598.49	1.4	0.489481	0.0886621	5.52075	3.38e-08	8.79e-07	yes	female
CG3603	530.798	1.69	0.758715	0.137519	5.51716	3.45e-08	8.95e-07	yes	female
phr	1178.45	0.62	-0.679573	0.123207	-5.51571	3.47e-08	9e-07	yes	female
CG11897	3071.97	0.64	-0.634038	0.114997	-5.5135	3.52e-08	9.1e-07	yes	female
Dh44-R1	531.3	0.64	-0.633062	0.11491	-5.50922	3.6e-08	9.3e-07	yes	female
mth	1164.99	0.74	-0.44269	0.0804355	-5.50366	3.72e-08	9.58e-07	yes	female
CG15096	4200.68	1.6	0.674493	0.122746	5.49505	3.91e-08	1e-06	yes	female
mwh	1230.99	0.68	-0.562406	0.102339	-5.4955	3.9e-08	1e-06	yes	female
CG7378	2094.02	1.65	0.721112	0.131331	5.49079	4e-08	1.02e-06	yes	female
CG32276	2335.98	1.64	0.711791	0.129718	5.48724	4.08e-08	1.04e-06	yes	female
CG14529	381.42	0.35	-1.49734	0.272954	-5.48571	4.12e-08	1.05e-06	yes	female
rt	470.507	0.63	-0.675366	0.12347	-5.46988	4.5e-08	1.15e-06	yes	female
Usp14	7384.7	0.53	-0.920052	0.168317	-5.46618	4.6e-08	1.17e-06	yes	female
CG12911	158.61	1.84	0.880985	0.161253	5.46338	4.67e-08	1.18e-06	yes	female
CG45062	12.1474	0.32	-1.62585	0.297735	-5.46072	4.74e-08	1.2e-06	yes	female
CG15093	1429.74	1.88	0.908036	0.166369	5.45796	4.82e-08	1.21e-06	yes	female
Obp18a	1101.96	1.8	0.850626	0.155855	5.45781	4.82e-08	1.21e-06	yes	female
Prx2540-2	1954.15	0.5	-1.00699	0.184455	-5.45927	4.78e-08	1.21e-06	yes	female
CG5955	819.989	2.46	1.29577	0.237606	5.45342	4.94e-08	1.24e-06	yes	female
Capa	744.705	1.9	0.924872	0.169713	5.44964	5.05e-08	1.26e-06	yes	female
CG31712	1596.07	0.62	-0.695947	0.12772	-5.44899	5.07e-08	1.27e-06	yes	female
AANATL2	404.546	0.6	-0.745212	0.136888	-5.44395	5.21e-08	1.3e-06	yes	female
CG12375	888.098	1.59	0.666354	0.122439	5.44234	5.26e-08	1.31e-06	yes	female
Sptr	744.317	1.43	0.512115	0.0940932	5.44263	5.25e-08	1.31e-06	yes	female
CG10492	764.307	0.62	-0.688917	0.126624	-5.44063	5.31e-08	1.32e-06	yes	female
CG10674	558.679	1.59	0.671233	0.123395	5.4397	5.34e-08	1.32e-06	yes	female
CG12728	820.848	1.46	0.541383	0.0996431	5.43323	5.53e-08	1.36e-06	yes	female
Irk1	271.568	1.63	0.706941	0.130092	5.43414	5.51e-08	1.36e-06	yes	female
pk	601.848	0.57	-0.81749	0.150633	-5.42701	5.73e-08	1.41e-06	yes	female
Sema5c	3077.94	0.67	-0.570941	0.105489	-5.41235	6.22e-08	1.53e-06	yes	female
CG2157	623.71	1.67	0.73616	0.136055	5.41074	6.28e-08	1.54e-06	yes	female
Usp5	2158.44	0.66	-0.591102	0.109252	-5.41044	6.29e-08	1.54e-06	yes	female
CG7675	4083.99	1.68	0.747891	0.13831	5.40736	6.4e-08	1.56e-06	yes	female
CG31997	4626.61	1.72	0.782312	0.144738	5.40501	6.48e-08	1.58e-06	yes	female
wrapper	427.971	1.82	0.86198	0.159515	5.40375	6.53e-08	1.58e-06	yes	female
Xpc	4413.26	0.83	-0.273899	0.0507277	-5.39938	6.69e-08	1.62e-06	yes	female
CG43920	50.9288	3.06	1.61169	0.298679	5.39605	6.81e-08	1.65e-06	yes	female
Achl	2098.82	0.43	-1.20998	0.224313	-5.39415	6.88e-08	1.66e-06	yes	female
CG2233	22378	2.03	1.01888	0.188956	5.39217	6.96e-08	1.68e-06	yes	female
Gs1	7814.47	1.34	0.41949	0.0779181	5.38373	7.3e-08	1.75e-06	yes	female
GstE1	3565.86	0.61	-0.71831	0.133435	-5.38321	7.32e-08	1.75e-06	yes	female
Uhg5	302.377	0.53	-0.922808	0.17139	-5.38427	7.27e-08	1.75e-06	yes	female
CG9515	272.765	1.55	0.630663	0.117174	5.3823	7.35e-08	1.76e-06	yes	female
SerRS	1544.93	1.38	0.460739	0.0856104	5.38181	7.37e-08	1.76e-06	yes	female
CG5522	648.67	0.65	-0.621585	0.115622	-5.37601	7.62e-08	1.81e-06	yes	female
MFS14	1748.1	0.58	-0.785776	0.146217	-5.37405	7.7e-08	1.83e-06	yes	female
alpha-Est9	4062.13	1.25	0.327524	0.0610001	5.36924	7.91e-08	1.87e-06	yes	female
CG6472	819.731	1.92	0.939808	0.17501	5.37002	7.87e-08	1.87e-06	yes	female
CG15236	2280.54	0.57	-0.803015	0.149716	-5.3636	8.16e-08	1.92e-06	yes	female
CG30431	47.7301	2.92	1.54738	0.288465	5.36419	8.13e-08	1.92e-06	yes	female
Galk	7405	1.75	0.806988	0.150477	5.36286	8.19e-08	1.92e-06	yes	female
PPO1	191.935	2.11	1.07764	0.200903	5.36396	8.14e-08	1.92e-06	yes	female
Cyp309a1	891.063	1.96	0.970229	0.181117	5.35693	8.46e-08	1.98e-06	yes	female
CG42237	631.063	0.51	-0.961787	0.179607	-5.35494	8.56e-08	2e-06	yes	female
CG43799	24.4325	0.35	-1.51005	0.281958	-5.35559	8.53e-08	2e-06	yes	female
Ndfip	957.606	1.7	0.766597	0.143166	5.35458	8.58e-08	2e-06	yes	female
CG7280	515.643	1.48	0.5609	0.104787	5.35277	8.66e-08	2.01e-06	yes	female
Gal	1453.76	1.56	0.637979	0.119177	5.35322	8.64e-08	2.01e-06	yes	female
CG14291	299.318	1.7	0.769755	0.143856	5.35087	8.75e-08	2.03e-06	yes	female
Nna1	7618.51	0.58	-0.794315	0.148438	-5.35114	8.74e-08	2.03e-06	yes	female
AOX1	2022.69	1.44	0.521228	0.0974721	5.34746	8.92e-08	2.06e-06	yes	female
Dro	273.429	2.75	1.461	0.273269	5.34639	8.97e-08	2.07e-06	yes	female
CLIP-190	8848.2	1.36	0.446259	0.0836131	5.33719	9.44e-08	2.17e-06	yes	female
Cad74A	1129.09	0.54	-0.889181	0.16679	-5.33116	9.76e-08	2.24e-06	yes	female
Ent2	709.176	1.38	0.468262	0.0878826	5.32827	9.92e-08	2.27e-06	yes	female
CG9914	3862.82	1.93	0.951823	0.178952	5.31886	1.04e-07	2.38e-06	yes	female
Prat2	5163.86	1.81	0.856369	0.161001	5.31902	1.04e-07	2.38e-06	yes	female
CG30280	247.044	0.33	-1.5801	0.297119	-5.31807	1.05e-07	2.39e-06	yes	female
CG12947	172.725	0.53	-0.922774	0.173667	-5.31346	1.08e-07	2.45e-06	yes	female
Ahcy	2143.65	1.73	0.791485	0.14909	5.30876	1.1e-07	2.51e-06	yes	female
CR45046	39.7925	2.68	1.42446	0.268395	5.30732	1.11e-07	2.52e-06	yes	female
eEF1delta	2098.65	1.48	0.564264	0.106409	5.3028	1.14e-07	2.58e-06	yes	female
mdy	2231.7	1.53	0.613965	0.115813	5.30133	1.15e-07	2.6e-06	yes	female
Tspo	2376.62	1.85	0.891214	0.16815	5.30013	1.16e-07	2.61e-06	yes	female
Mfe2	3975.49	1.56	0.643461	0.121455	5.29794	1.17e-07	2.64e-06	yes	female
Tret1-1	6948.49	1.48	0.567241	0.107077	5.29752	1.17e-07	2.64e-06	yes	female
CG13482	26.4789	2.8	1.48686	0.281104	5.28938	1.23e-07	2.75e-06	yes	female
Mdh1	9790.99	1.48	0.568634	0.107521	5.28859	1.23e-07	2.76e-06	yes	female
vis	75.0003	0.49	-1.03817	0.196486	-5.28368	1.27e-07	2.83e-06	yes	female
CG2254	3746.91	1.47	0.550946	0.104321	5.28124	1.28e-07	2.86e-06	yes	female
CG12795	1240.17	0.58	-0.781086	0.148093	-5.27429	1.33e-07	2.96e-06	yes	female
scaRNA:PsiU2-55	793.862	2.17	1.11869	0.212097	5.27443	1.33e-07	2.96e-06	yes	female
CG3345	54.5485	0.46	-1.12616	0.213745	-5.26872	1.37e-07	3.05e-06	yes	female
Sxl	8530.64	1.52	0.607291	0.115274	5.26823	1.38e-07	3.05e-06	yes	female
CG18304	1957.66	0.62	-0.691053	0.131232	-5.26587	1.4e-07	3.08e-06	yes	female
CR45125	22.6885	2.74	1.45608	0.276491	5.26627	1.39e-07	3.08e-06	yes	female
CG11858	240.449	1.68	0.74561	0.141697	5.26199	1.43e-07	3.14e-06	yes	female
NimA	142.689	0.43	-1.20323	0.228712	-5.2609	1.43e-07	3.15e-06	yes	female
CG1136	2129.65	1.26	0.33463	0.0636216	5.25969	1.44e-07	3.17e-06	yes	female
CG14401	588.707	1.53	0.608855	0.115774	5.259	1.45e-07	3.17e-06	yes	female
CG8468	1465.61	1.69	0.757237	0.143985	5.25913	1.45e-07	3.17e-06	yes	female
GstD10	82.0039	2.07	1.0471	0.199207	5.25637	1.47e-07	3.2e-06	yes	female
Magi	1411.59	0.72	-0.468323	0.0890935	-5.25653	1.47e-07	3.2e-06	yes	female
Amy-p	338.426	2.51	1.32648	0.252564	5.25204	1.5e-07	3.27e-06	yes	female
CG4858	721.618	1.63	0.704847	0.134253	5.25016	1.52e-07	3.3e-06	yes	female
CG33120	477.621	2.23	1.15896	0.22107	5.24252	1.58e-07	3.43e-06	yes	female
sqh	3556.64	1.35	0.432209	0.0824626	5.24128	1.59e-07	3.45e-06	yes	female
Shroom	1304.98	0.68	-0.558904	0.1067	-5.23808	1.62e-07	3.5e-06	yes	female
CG15021	753.866	0.49	-1.01459	0.193832	-5.23439	1.66e-07	3.57e-06	yes	female
CG42807	1127.11	0.58	-0.782819	0.149623	-5.23193	1.68e-07	3.61e-06	yes	female
CG1440	7106.62	0.57	-0.811422	0.155155	-5.22974	1.7e-07	3.65e-06	yes	female
CG32641	56.6385	2.73	1.44833	0.277053	5.22762	1.72e-07	3.68e-06	yes	female
CG9928	2564.59	2.08	1.05643	0.202307	5.22193	1.77e-07	3.79e-06	yes	female
lox2	739.931	0.64	-0.642761	0.123184	-5.21789	1.81e-07	3.87e-06	yes	female
Ork1	617.148	0.68	-0.565013	0.108291	-5.21756	1.81e-07	3.87e-06	yes	female
CG12716	13.915	2.91	1.54119	0.295443	5.21653	1.82e-07	3.88e-06	yes	female
antr	17.849	0.34	-1.54854	0.297035	-5.21331	1.86e-07	3.94e-06	yes	female
CG1105	1057.25	1.74	0.79605	0.152721	5.21245	1.86e-07	3.95e-06	yes	female
CG14787	93.0271	0.43	-1.22835	0.235731	-5.21082	1.88e-07	3.98e-06	yes	female
AcCoAS	20917.5	1.39	0.475276	0.0912238	5.21	1.89e-07	3.99e-06	yes	female
spri	5392.77	0.72	-0.477913	0.0917932	-5.20641	1.93e-07	4.06e-06	yes	female
EndoGI	1393.64	1.54	0.622043	0.119517	5.20464	1.94e-07	4.1e-06	yes	female
kkv	6085.03	0.58	-0.783385	0.150539	-5.20387	1.95e-07	4.11e-06	yes	female
atilla	2151.32	1.85	0.888029	0.170677	5.20298	1.96e-07	4.12e-06	yes	female
CG9934	16102.6	0.5	-1.00505	0.193309	-5.19919	2e-07	4.2e-06	yes	female
CngA	298.581	0.63	-0.662908	0.127589	-5.19565	2.04e-07	4.27e-06	yes	female
Ilk	2391.34	1.25	0.321897	0.0620146	5.19066	2.1e-07	4.38e-06	yes	female
Dsk	694.042	1.95	0.964993	0.186237	5.18152	2.2e-07	4.59e-06	yes	female
CG9628	2812.58	1.73	0.787333	0.151964	5.18104	2.21e-07	4.6e-06	yes	female
CG4598	1668.31	1.84	0.880034	0.169889	5.18007	2.22e-07	4.61e-06	yes	female
Rpn6	13296	0.55	-0.850743	0.164238	-5.17992	2.22e-07	4.61e-06	yes	female
fu12	842.361	1.78	0.835502	0.161362	5.1778	2.25e-07	4.65e-06	yes	female
CG10188	3005.52	0.64	-0.644745	0.124585	-5.17513	2.28e-07	4.71e-06	yes	female
NimC1	1518.31	1.5	0.589649	0.11398	5.17327	2.3e-07	4.75e-06	yes	female
CG4607	1631.31	1.33	0.411257	0.079505	5.17271	2.31e-07	4.76e-06	yes	female
CG9510	2618.1	2	1.00348	0.194226	5.16655	2.38e-07	4.91e-06	yes	female
CG11170	202.734	0.61	-0.718013	0.13911	-5.16148	2.45e-07	5.02e-06	yes	female
CG3257	3413.96	0.74	-0.43554	0.0843773	-5.16182	2.45e-07	5.02e-06	yes	female
CR45209	105.974	1.94	0.953388	0.184688	5.16214	2.44e-07	5.02e-06	yes	female
CG2604	6460.24	1.88	0.909595	0.176284	5.15982	2.47e-07	5.05e-06	yes	female
Dhx15	1895.36	1.43	0.51466	0.0998117	5.15631	2.52e-07	5.14e-06	yes	female
CR44994	16.8897	2.79	1.47863	0.286878	5.1542	2.55e-07	5.19e-06	yes	female
CG42329	417.194	2.12	1.0845	0.210449	5.15328	2.56e-07	5.21e-06	yes	female
CG34242	297.551	1.76	0.816001	0.158411	5.15116	2.59e-07	5.25e-06	yes	female
Reg-2	2230.4	1.84	0.87734	0.170323	5.15103	2.59e-07	5.25e-06	yes	female
Galt	1409.24	1.4	0.485099	0.0942129	5.14896	2.62e-07	5.3e-06	yes	female
SLC22A	1312.98	0.62	-0.696012	0.135304	-5.14406	2.69e-07	5.42e-06	yes	female
Spase25	717.868	1.66	0.734647	0.142812	5.14414	2.69e-07	5.42e-06	yes	female
CG4586	177.697	0.57	-0.809701	0.157554	-5.13921	2.76e-07	5.55e-06	yes	female
Sec61gamma	1439.62	1.78	0.829377	0.16137	5.13959	2.75e-07	5.55e-06	yes	female
Grip84	1343.53	0.59	-0.755097	0.147032	-5.13558	2.81e-07	5.65e-06	yes	female
Aldh	39081.6	1.79	0.836985	0.163035	5.13378	2.84e-07	5.69e-06	yes	female
NimB2	4326.76	1.88	0.913764	0.178099	5.13067	2.89e-07	5.77e-06	yes	female
Oda	52336.9	1.32	0.399695	0.0779007	5.13082	2.88e-07	5.77e-06	yes	female
CG44013	4.45568	0.41	-1.29018	0.251784	-5.12415	2.99e-07	5.95e-06	yes	female
TppII	13402.7	0.6	-0.737394	0.143896	-5.12451	2.98e-07	5.95e-06	yes	female
CG3295	3281.78	0.74	-0.43953	0.0857846	-5.12365	3e-07	5.96e-06	yes	female
fw	2467.01	0.7	-0.509753	0.0996094	-5.11752	3.1e-07	6.14e-06	yes	female
CG30101	651.08	0.44	-1.19428	0.233575	-5.11307	3.17e-07	6.28e-06	yes	female
Syngr	7830.34	0.65	-0.617387	0.120849	-5.10875	3.24e-07	6.42e-06	yes	female
CG43103	590.1	1.81	0.855626	0.167528	5.10737	3.27e-07	6.45e-06	yes	female
Est-6	4574.78	2.29	1.19799	0.234673	5.10493	3.31e-07	6.53e-06	yes	female
CG42369	2092.16	2.14	1.09998	0.21565	5.10076	3.38e-07	6.66e-06	yes	female
Rpn1	8996.19	0.51	-0.98543	0.193371	-5.09605	3.47e-07	6.82e-06	yes	female
pico	2526.43	0.73	-0.458289	0.0899419	-5.09538	3.48e-07	6.83e-06	yes	female
CG16974	9313.35	0.82	-0.283363	0.0557015	-5.08717	3.63e-07	7.11e-06	yes	female
Spt5	2947.32	0.73	-0.462157	0.0908437	-5.08739	3.63e-07	7.11e-06	yes	female
CG13551	2514.18	1.56	0.640612	0.125998	5.08433	3.69e-07	7.18e-06	yes	female
CG1461	379.65	1.86	0.892251	0.175483	5.08453	3.69e-07	7.18e-06	yes	female
CG31183	780.151	0.63	-0.659706	0.129755	-5.08424	3.69e-07	7.18e-06	yes	female
CG31357	1239.99	0.62	-0.692175	0.136155	-5.08372	3.7e-07	7.18e-06	yes	female
Gs2	24568	1.43	0.51854	0.101994	5.08404	3.69e-07	7.18e-06	yes	female
Atet	6937.17	0.66	-0.591135	0.116316	-5.08216	3.73e-07	7.23e-06	yes	female
CG8206	1453.86	1.7	0.763337	0.150205	5.08196	3.74e-07	7.23e-06	yes	female
Spn47C	2071.35	0.6	-0.739516	0.145558	-5.08057	3.76e-07	7.27e-06	yes	female
CG31676	1335.08	1.59	0.667085	0.131409	5.07639	3.85e-07	7.42e-06	yes	female
Traf4	428.51	0.64	-0.646221	0.127399	-5.07241	3.93e-07	7.55e-06	yes	female
tRNA:Asp-GTC-2-1	28.3057	0.35	-1.49587	0.294902	-5.07245	3.93e-07	7.55e-06	yes	female
CG11699	1682.3	1.81	0.854185	0.168419	5.0718	3.94e-07	7.57e-06	yes	female
CG15445	2899.5	0.56	-0.834635	0.164619	-5.0701	3.98e-07	7.62e-06	yes	female
CG6928	414.184	0.69	-0.537747	0.106099	-5.06833	4.01e-07	7.68e-06	yes	female
Cys	33160.9	1.57	0.652172	0.128771	5.06459	4.09e-07	7.82e-06	yes	female
RpL37a	12714.5	1.64	0.712696	0.140743	5.06382	4.11e-07	7.84e-06	yes	female
r	1416.14	0.77	-0.373554	0.0738099	-5.06103	4.17e-07	7.94e-06	yes	female
CG6543	2171.75	1.65	0.721659	0.142705	5.05699	4.26e-07	8.1e-06	yes	female
CG9505	233.028	0.54	-0.877333	0.17391	-5.04476	4.54e-07	8.62e-06	yes	female
Nipsnap	2482.83	1.51	0.590763	0.117167	5.04204	4.61e-07	8.73e-06	yes	female
CG32115	139.744	1.81	0.852054	0.169066	5.03976	4.66e-07	8.8e-06	yes	female
Cpr67Fb	11.1759	0.35	-1.50883	0.299369	-5.04003	4.65e-07	8.8e-06	yes	female
Obp99b	1092.66	2.2	1.13972	0.226151	5.03966	4.66e-07	8.8e-06	yes	female
CG3940	2997.29	0.76	-0.39023	0.0774715	-5.03708	4.73e-07	8.91e-06	yes	female
Nlg2	2349.47	0.56	-0.837123	0.166373	-5.03162	4.86e-07	9.15e-06	yes	female
cg	5384.35	0.76	-0.40485	0.0805228	-5.02777	4.96e-07	9.32e-06	yes	female
Rpn11	8121.37	0.58	-0.79096	0.157338	-5.02715	4.98e-07	9.34e-06	yes	female
CG17333	993.917	1.71	0.776939	0.154834	5.01789	5.22e-07	9.77e-06	yes	female
CG31469	291.098	1.71	0.774248	0.154293	5.01803	5.22e-07	9.77e-06	yes	female
CG10512	1731.56	1.69	0.753087	0.150141	5.01586	5.28e-07	9.86e-06	yes	female
CG4562	1470.84	0.64	-0.639049	0.127468	-5.01342	5.35e-07	9.97e-06	yes	female
Tig	8269.28	1.32	0.401374	0.0800719	5.01267	5.37e-07	9.99e-06	yes	female
CG5567	1775.9	1.45	0.539751	0.107747	5.00943	5.46e-07	1.01e-05	yes	female
Rrp4	240.567	1.55	0.627616	0.125279	5.00973	5.45e-07	1.01e-05	yes	female
CG10799	881.216	2.29	1.19256	0.238138	5.00786	5.5e-07	1.02e-05	yes	female
CG34208	211.753	0.53	-0.919177	0.183698	-5.00374	5.62e-07	1.04e-05	yes	female
CR46074	60.9427	2.07	1.04688	0.209365	5.00029	5.72e-07	1.06e-05	yes	female
DptB	2919.88	2.79	1.47808	0.295617	4.99998	5.73e-07	1.06e-05	yes	female
tRNA:Pro-AGG-1-6	5.46007	2.67	1.41828	0.283901	4.99567	5.86e-07	1.08e-05	yes	female
Ugt86Da	1068.66	1.68	0.744535	0.149057	4.99497	5.88e-07	1.08e-05	yes	female
CG3301	1793.09	1.28	0.356955	0.0714903	4.99306	5.94e-07	1.09e-05	yes	female
CG15431	1928.27	1.6	0.675233	0.135507	4.98299	6.26e-07	1.15e-05	yes	female
CG9629	2040.84	1.38	0.463424	0.0930159	4.9822	6.29e-07	1.15e-05	yes	female
CG34324	5.58408	0.41	-1.27988	0.257132	-4.97752	6.44e-07	1.17e-05	yes	female
Klc	4520.52	1.26	0.339022	0.0680988	4.97838	6.41e-07	1.17e-05	yes	female
Mtk	2363.35	2.79	1.48055	0.297448	4.97753	6.44e-07	1.17e-05	yes	female
CG11147	5680.39	1.54	0.621271	0.124872	4.97525	6.52e-07	1.18e-05	yes	female
CG13618	122.454	2.66	1.41157	0.283618	4.97702	6.46e-07	1.18e-05	yes	female
CG16721	10290.9	0.68	-0.546416	0.109927	-4.97072	6.67e-07	1.21e-05	yes	female
CG6910	4064.05	2.2	1.13944	0.229414	4.96674	6.81e-07	1.23e-05	yes	female
CG12766	37.3272	2.51	1.32873	0.267644	4.96453	6.89e-07	1.25e-05	yes	female
Rpt2	11318.5	0.61	-0.713707	0.143769	-4.96425	6.9e-07	1.25e-05	yes	female
Ude	597.286	1.55	0.633708	0.127659	4.96408	6.9e-07	1.25e-05	yes	female
CG5399	934.049	1.64	0.713954	0.143928	4.96051	7.03e-07	1.26e-05	yes	female
CR43432	69.3605	0.54	-0.887388	0.178889	-4.96054	7.03e-07	1.26e-05	yes	female
CG34165	383.798	1.56	0.640343	0.129164	4.95759	7.14e-07	1.28e-05	yes	female
CG11407	4862.05	0.74	-0.43115	0.0870037	-4.95554	7.21e-07	1.29e-05	yes	female
Tsf1	36888.9	1.7	0.762543	0.153879	4.95546	7.22e-07	1.29e-05	yes	female
lost	9195.81	1.33	0.410477	0.0829135	4.95066	7.4e-07	1.32e-05	yes	female
CG10185	871.481	0.62	-0.678201	0.13705	-4.94858	7.48e-07	1.34e-05	yes	female
CG42272	83.5958	2.08	1.05737	0.213839	4.94473	7.63e-07	1.36e-05	yes	female
Ggt-1	1156.36	1.42	0.504471	0.102047	4.94353	7.67e-07	1.36e-05	yes	female
Hsp70Aa	22.0509	2.67	1.41875	0.286978	4.94377	7.66e-07	1.36e-05	yes	female
128up	798.859	1.63	0.702998	0.142253	4.94186	7.74e-07	1.37e-05	yes	female
Cyp6a22	418.848	1.83	0.875061	0.177029	4.94304	7.69e-07	1.37e-05	yes	female
Ddr	1089.68	0.73	-0.451289	0.0913239	-4.94163	7.75e-07	1.37e-05	yes	female
Dbi	2523.87	1.76	0.81517	0.165234	4.93342	8.08e-07	1.43e-05	yes	female
Nurf-38	5786.05	1.81	0.855676	0.173483	4.93232	8.13e-07	1.43e-05	yes	female
Npc2h	456.286	0.58	-0.776369	0.157473	-4.93018	8.22e-07	1.45e-05	yes	female
ASPP	1390.55	0.7	-0.504939	0.102509	-4.92581	8.4e-07	1.47e-05	yes	female
CG9003	4560.41	0.54	-0.876707	0.17794	-4.92698	8.35e-07	1.47e-05	yes	female
CR43361	205.21	0.56	-0.828591	0.168174	-4.927	8.35e-07	1.47e-05	yes	female
Charon	1382.36	0.65	-0.631689	0.128394	-4.91992	8.66e-07	1.52e-05	yes	female
CG3308	4535.97	1.52	0.607665	0.123595	4.91658	8.81e-07	1.54e-05	yes	female
CG8860	502.524	1.76	0.815204	0.165837	4.91571	8.85e-07	1.54e-05	yes	female
Mdr50	40.2048	2.78	1.47418	0.299853	4.91634	8.82e-07	1.54e-05	yes	female
Sytalpha	3291.81	0.75	-0.409653	0.0834313	-4.91006	9.1e-07	1.59e-05	yes	female
repo	2261.21	0.79	-0.349178	0.0711399	-4.90833	9.19e-07	1.6e-05	yes	female
CG5335	254.284	1.58	0.661213	0.134752	4.90689	9.25e-07	1.61e-05	yes	female
Grip163	845.6	0.65	-0.610461	0.124403	-4.90712	9.24e-07	1.61e-05	yes	female
CR45320	30.6316	0.4	-1.33852	0.272933	-4.9042	9.38e-07	1.62e-05	yes	female
net	130.551	0.52	-0.956722	0.195036	-4.90535	9.33e-07	1.62e-05	yes	female
sav	445.822	0.7	-0.511729	0.104347	-4.9041	9.39e-07	1.62e-05	yes	female
Lip2	24.5434	2.63	1.39713	0.285081	4.90083	9.54e-07	1.65e-05	yes	female
apolpp	83469.5	2.67	1.41708	0.289283	4.89861	9.65e-07	1.66e-05	yes	female
CG12384	1487.24	1.71	0.770377	0.157268	4.89849	9.66e-07	1.66e-05	yes	female
CG34456	43.9581	2.61	1.38332	0.282492	4.89684	9.74e-07	1.67e-05	yes	female
Rpb5	442.298	1.55	0.635941	0.129899	4.89567	9.8e-07	1.68e-05	yes	female
RhoGEF64C	2300.36	0.71	-0.502704	0.102753	-4.89234	9.96e-07	1.71e-05	yes	female
CG1812	909.03	0.72	-0.471832	0.0964893	-4.88999	1.01e-06	1.72e-05	yes	female
CG7616	465.847	1.46	0.545307	0.111489	4.89112	1e-06	1.72e-05	yes	female
Gip	2070.35	1.7	0.768883	0.157256	4.88936	1.01e-06	1.73e-05	yes	female
CG5515	885.826	1.43	0.511707	0.104696	4.88754	1.02e-06	1.74e-05	yes	female
CG2556	305.468	0.65	-0.625501	0.128019	-4.88599	1.03e-06	1.75e-05	yes	female
CG40486	1836.19	2.11	1.08008	0.221251	4.88168	1.05e-06	1.79e-05	yes	female
CG8213	479.997	0.53	-0.902729	0.18493	-4.88147	1.05e-06	1.79e-05	yes	female
CG43236	220.562	2.44	1.28937	0.264422	4.87616	1.08e-06	1.83e-05	yes	female
Nrt	1817.98	0.69	-0.529015	0.108499	-4.87577	1.08e-06	1.83e-05	yes	female
KdelR	1983.81	1.38	0.467291	0.0958879	4.8733	1.1e-06	1.85e-05	yes	female
CG11267	1376.43	1.49	0.579975	0.11912	4.86883	1.12e-06	1.89e-05	yes	female
CG4580	49.9576	0.42	-1.25513	0.258087	-4.86321	1.15e-06	1.95e-05	yes	female
Exn	7993.51	0.66	-0.5978	0.123001	-4.86013	1.17e-06	1.97e-05	yes	female
ergic53	2584.75	1.43	0.515645	0.106119	4.85914	1.18e-06	1.98e-05	yes	female
Aac11	2585.65	0.71	-0.490695	0.101006	-4.85808	1.19e-06	1.99e-05	yes	female
CG34398	3265.32	0.67	-0.572824	0.117926	-4.85748	1.19e-06	1.99e-05	yes	female
CG42561	97.4159	1.91	0.936686	0.192816	4.85793	1.19e-06	1.99e-05	yes	female
CG6040	5660.27	0.65	-0.61701	0.12705	-4.85643	1.2e-06	2e-05	yes	female
Col4a1	13054	0.6	-0.742027	0.152794	-4.85637	1.2e-06	2e-05	yes	female
Snx16	618.926	1.54	0.619044	0.12752	4.85449	1.21e-06	2.01e-05	yes	female
CG8066	774.464	1.57	0.650058	0.133927	4.85382	1.21e-06	2.02e-05	yes	female
CG6723	5408.84	0.54	-0.876843	0.180701	-4.85245	1.22e-06	2.03e-05	yes	female
Desat1	18827.7	2.07	1.05163	0.216861	4.84933	1.24e-06	2.06e-05	yes	female
homer	6181.78	0.75	-0.413173	0.0852307	-4.8477	1.25e-06	2.07e-05	yes	female
CR13130	205.098	1.74	0.799867	0.165166	4.8428	1.28e-06	2.12e-05	yes	female
CG30274	36.7261	0.42	-1.26849	0.26203	-4.841	1.29e-06	2.13e-05	yes	female
Ir25a	240.178	0.64	-0.64886	0.134022	-4.84143	1.29e-06	2.13e-05	yes	female
Cyp49a1	217.769	0.55	-0.857195	0.177148	-4.83886	1.31e-06	2.15e-05	yes	female
AstC	502.64	1.47	0.552991	0.114322	4.83713	1.32e-06	2.17e-05	yes	female
CG16758	7365.22	1.96	0.9715	0.200859	4.83672	1.32e-06	2.17e-05	yes	female
Fdh	2838.68	1.48	0.566919	0.117219	4.8364	1.32e-06	2.17e-05	yes	female
Idgf2	4952.15	1.66	0.733291	0.151605	4.83686	1.32e-06	2.17e-05	yes	female
Ibf1	272.082	1.63	0.707695	0.14648	4.83133	1.36e-06	2.22e-05	yes	female
CG14715	578.641	1.64	0.71692	0.148539	4.82647	1.39e-06	2.27e-05	yes	female
DnaJ-H	6152.61	0.68	-0.563807	0.11689	-4.82338	1.41e-06	2.31e-05	yes	female
GILT1	3948.88	1.51	0.595484	0.123478	4.8226	1.42e-06	2.31e-05	yes	female
Grx1	1053.6	1.52	0.60021	0.124554	4.81887	1.44e-06	2.35e-05	yes	female
Rpt3	6628.4	0.62	-0.695269	0.144311	-4.81785	1.45e-06	2.36e-05	yes	female
CG18343	411.508	1.87	0.903066	0.187736	4.81031	1.51e-06	2.45e-05	yes	female
CG8419	265.604	0.64	-0.641171	0.133455	-4.8044	1.55e-06	2.52e-05	yes	female
Uba5	831.681	1.44	0.527849	0.109867	4.80445	1.55e-06	2.52e-05	yes	female
CG9312	475.139	1.81	0.858275	0.178759	4.80131	1.58e-06	2.55e-05	yes	female
Rpn3	12657.5	0.61	-0.723858	0.151025	-4.79297	1.64e-06	2.66e-05	yes	female
rempA	227.315	0.62	-0.693288	0.144719	-4.79058	1.66e-06	2.69e-05	yes	female
CG16820	595.136	1.85	0.889998	0.185941	4.78644	1.7e-06	2.74e-05	yes	female
Gbp3	677.001	1.86	0.895857	0.187297	4.78309	1.73e-06	2.78e-05	yes	female
CG6523	1673.46	1.5	0.581746	0.121693	4.78044	1.75e-06	2.81e-05	yes	female
CG33469	18.461	2.5	1.31911	0.276073	4.77814	1.77e-06	2.84e-05	yes	female
DnaJ-1	8650	1.66	0.735411	0.154001	4.77535	1.79e-06	2.88e-05	yes	female
CG32795	1155.19	1.34	0.422683	0.088536	4.77414	1.8e-06	2.89e-05	yes	female
CG7872	904.474	1.28	0.354947	0.0743666	4.77293	1.82e-06	2.9e-05	yes	female
Eip55E	1058.24	1.58	0.661542	0.138727	4.76865	1.85e-06	2.96e-05	yes	female
UGP	12170.4	1.8	0.849363	0.17811	4.76874	1.85e-06	2.96e-05	yes	female
twr	1123.02	1.48	0.569825	0.119534	4.76706	1.87e-06	2.98e-05	yes	female
Sc2	1376.73	1.4	0.485426	0.101865	4.76537	1.89e-06	3e-05	yes	female
CG10077	5794.81	0.73	-0.446817	0.0937967	-4.76367	1.9e-06	3.02e-05	yes	female
Karl	998.723	1.63	0.701692	0.14729	4.76402	1.9e-06	3.02e-05	yes	female
CG5290	288.69	1.71	0.776142	0.163092	4.75893	1.95e-06	3.09e-05	yes	female
CG32444	7790.79	1.75	0.810012	0.170254	4.75768	1.96e-06	3.1e-05	yes	female
Tsp42Eg	727.401	1.37	0.451572	0.0949157	4.75761	1.96e-06	3.1e-05	yes	female
btsz	8161.92	0.74	-0.42809	0.0901187	-4.75029	2.03e-06	3.21e-05	yes	female
sano	2584.21	0.59	-0.764302	0.161008	-4.74698	2.06e-06	3.26e-05	yes	female
AttB	938.638	2.54	1.34314	0.283091	4.74454	2.09e-06	3.29e-05	yes	female
CG3700	873.731	1.47	0.55283	0.116533	4.74399	2.1e-06	3.3e-05	yes	female
Spn42Da	1947.29	1.59	0.666415	0.140496	4.7433	2.1e-06	3.3e-05	yes	female
CG11159	157.987	0.44	-1.19895	0.252887	-4.74105	2.13e-06	3.33e-05	yes	female
Hayan	543.42	1.53	0.612894	0.129259	4.7416	2.12e-06	3.33e-05	yes	female
RhoBTB	2932.82	0.73	-0.453881	0.0957359	-4.74096	2.13e-06	3.33e-05	yes	female
CG13813	169.016	1.99	0.996092	0.210282	4.73693	2.17e-06	3.38e-05	yes	female
CG30486	15.1841	0.39	-1.35351	0.285722	-4.73717	2.17e-06	3.38e-05	yes	female
CG6178	1000.43	1.33	0.412322	0.0870276	4.73782	2.16e-06	3.38e-05	yes	female
Nrx-IV	6648.16	1.27	0.344207	0.0726539	4.73762	2.16e-06	3.38e-05	yes	female
CG4945	864.585	0.5	-0.989898	0.209167	-4.73257	2.22e-06	3.45e-05	yes	female
AdenoK	2269.74	1.57	0.652883	0.138067	4.72874	2.26e-06	3.51e-05	yes	female
Sema2b	3640.2	0.61	-0.719321	0.15214	-4.72802	2.27e-06	3.52e-05	yes	female
NimB3	285.192	1.94	0.95409	0.201835	4.72707	2.28e-06	3.53e-05	yes	female
CG10283	1207.31	0.71	-0.484893	0.102621	-4.72509	2.3e-06	3.55e-05	yes	female
stl	296.046	0.56	-0.839162	0.177585	-4.72542	2.3e-06	3.55e-05	yes	female
CG31370	361.715	1.44	0.521602	0.110429	4.72342	2.32e-06	3.58e-05	yes	female
CR44030	226.351	0.53	-0.923913	0.195595	-4.72361	2.32e-06	3.58e-05	yes	female
alpha-Man-IIb	4916.96	0.81	-0.299099	0.0634154	-4.71651	2.4e-06	3.69e-05	yes	female
achi	243.77	1.53	0.617223	0.130882	4.71588	2.41e-06	3.7e-05	yes	female
AstC-R2	746.881	0.71	-0.504162	0.106927	-4.71501	2.42e-06	3.7e-05	yes	female
Hr4	256.41	0.55	-0.869021	0.184284	-4.71565	2.41e-06	3.7e-05	yes	female
Muc68D	4.71384	0.44	-1.17122	0.248379	-4.71547	2.41e-06	3.7e-05	yes	female
CG14511	145.653	1.7	0.768691	0.163151	4.71152	2.46e-06	3.76e-05	yes	female
CG33080	2753.41	1.35	0.433501	0.0920203	4.71094	2.47e-06	3.77e-05	yes	female
Ect3	5760.8	0.56	-0.837978	0.177978	-4.70832	2.5e-06	3.81e-05	yes	female
CG9186	2383.91	1.43	0.511071	0.108556	4.7079	2.5e-06	3.82e-05	yes	female
CG43795	2950.19	0.77	-0.384762	0.0817774	-4.70499	2.54e-06	3.87e-05	yes	female
Arp2	1757.41	1.35	0.43288	0.0920267	4.70385	2.55e-06	3.88e-05	yes	female
ZnT35C	43.4091	0.47	-1.07488	0.228601	-4.70197	2.58e-06	3.91e-05	yes	female
CG11790	1384.66	1.48	0.568128	0.120837	4.7016	2.58e-06	3.92e-05	yes	female
CG1504	66.309	0.52	-0.950486	0.202271	-4.69907	2.61e-06	3.96e-05	yes	female
CG15309	4083.6	0.6	-0.738502	0.157208	-4.69762	2.63e-06	3.98e-05	yes	female
CG5946	6039.65	1.59	0.664513	0.141462	4.69748	2.63e-06	3.98e-05	yes	female
CG1572	295.544	1.57	0.646671	0.137817	4.69225	2.7e-06	4.08e-05	yes	female
Tsp42Er	38.9363	2.43	1.28038	0.273006	4.68995	2.73e-06	4.12e-05	yes	female
niki	60.6511	0.52	-0.934909	0.199417	-4.68822	2.76e-06	4.15e-05	yes	female
Sec63	3887.69	1.19	0.248454	0.0530117	4.68677	2.78e-06	4.17e-05	yes	female
CG12075	2298.65	0.7	-0.50453	0.107675	-4.68567	2.79e-06	4.18e-05	yes	female
CG3332	14.1803	0.38	-1.39179	0.297003	-4.68613	2.78e-06	4.18e-05	yes	female
Cyp305a1	1507.67	1.68	0.748581	0.159753	4.68587	2.79e-06	4.18e-05	yes	female
DhpD	1204.76	0.55	-0.854301	0.182467	-4.68194	2.84e-06	4.25e-05	yes	female
CG7970	501.836	1.56	0.641483	0.13708	4.67964	2.87e-06	4.3e-05	yes	female
Cbp53E	13919.3	0.64	-0.652804	0.139664	-4.67409	2.95e-06	4.4e-05	yes	female
resilin	357.69	0.54	-0.891353	0.190714	-4.67378	2.96e-06	4.4e-05	yes	female
Rpn2	10822.6	0.52	-0.932665	0.199534	-4.67421	2.95e-06	4.4e-05	yes	female
ninaE	326300	1.49	0.571536	0.122357	4.67104	3e-06	4.46e-05	yes	female
Zip99C	3878.45	0.8	-0.326957	0.0700062	-4.6704	3.01e-06	4.47e-05	yes	female
CG15117	1002.71	1.54	0.626361	0.13418	4.66809	3.04e-06	4.51e-05	yes	female
CG12483	192.468	0.55	-0.8642	0.185255	-4.66491	3.09e-06	4.58e-05	yes	female
MRP	7216.64	0.74	-0.440972	0.0945698	-4.66293	3.12e-06	4.61e-05	yes	female
CG3746	134.669	1.69	0.759338	0.162883	4.66187	3.13e-06	4.63e-05	yes	female
CG9890	499.236	1.55	0.636453	0.13652	4.66198	3.13e-06	4.63e-05	yes	female
DppIII	4060.75	0.71	-0.494287	0.106039	-4.66136	3.14e-06	4.63e-05	yes	female
Hsp70Ab	894.971	2.49	1.31612	0.282352	4.66128	3.14e-06	4.63e-05	yes	female
Oseg2	139.816	0.57	-0.813214	0.174497	-4.66034	3.16e-06	4.65e-05	yes	female
CG7834	4981.07	1.67	0.741596	0.159241	4.65707	3.21e-06	4.71e-05	yes	female
CR42860	303.336	1.76	0.812903	0.174549	4.65718	3.21e-06	4.71e-05	yes	female
stai	7088.27	0.64	-0.633499	0.136084	-4.65522	3.24e-06	4.74e-05	yes	female
Tctp	17937.1	1.42	0.502602	0.107967	4.65515	3.24e-06	4.74e-05	yes	female
CG15394	345.88	1.86	0.896664	0.192651	4.65434	3.25e-06	4.75e-05	yes	female
Oamb	1593.75	0.7	-0.509704	0.109502	-4.65473	3.24e-06	4.75e-05	yes	female
CG3663	357.66	1.59	0.673483	0.144726	4.6535	3.26e-06	4.76e-05	yes	female
Cda4	1640.42	0.66	-0.600662	0.129125	-4.65178	3.29e-06	4.8e-05	yes	female
Dark	2005.99	0.77	-0.380062	0.0817268	-4.6504	3.31e-06	4.82e-05	yes	female
Grik	232.314	0.59	-0.767114	0.164982	-4.64968	3.32e-06	4.83e-05	yes	female
beat-Ib	1851.96	1.29	0.368575	0.0792789	4.64909	3.33e-06	4.84e-05	yes	female
CG8306	5292.19	0.69	-0.542629	0.116742	-4.6481	3.35e-06	4.86e-05	yes	female
Atg2	4690.28	0.71	-0.49855	0.107279	-4.64722	3.36e-06	4.87e-05	yes	female
AttC	2975.79	2.62	1.39231	0.299614	4.64701	3.37e-06	4.87e-05	yes	female
CG3097	1027.1	1.31	0.392058	0.0843779	4.64645	3.38e-06	4.88e-05	yes	female
CG7884	55.4523	0.45	-1.15781	0.249176	-4.64656	3.38e-06	4.88e-05	yes	female
CG2650	26334.8	0.42	-1.26122	0.271585	-4.64393	3.42e-06	4.93e-05	yes	female
Parp16	36.5831	2.29	1.19286	0.25693	4.64272	3.44e-06	4.95e-05	yes	female
CG15695	576.778	1.41	0.491726	0.105937	4.64169	3.46e-06	4.97e-05	yes	female
CG5828	344.52	0.6	-0.736421	0.158668	-4.64127	3.46e-06	4.97e-05	yes	female
Gycbeta100B	4264.45	0.76	-0.401258	0.0864474	-4.64164	3.46e-06	4.97e-05	yes	female
CG30281	515.397	0.39	-1.36297	0.293998	-4.63599	3.55e-06	5.09e-05	yes	female
CCT6	2286.16	1.31	0.388749	0.0838886	4.63411	3.58e-06	5.13e-05	yes	female
CG14340	132.538	0.55	-0.858793	0.185311	-4.63433	3.58e-06	5.13e-05	yes	female
CG30377	324.002	0.68	-0.561652	0.12131	-4.62988	3.66e-06	5.22e-05	yes	female
rictor	1934.83	0.74	-0.443986	0.0958885	-4.63023	3.65e-06	5.22e-05	yes	female
awd	7522.5	1.65	0.72134	0.155843	4.62863	3.68e-06	5.25e-05	yes	female
CR45009	103.254	1.97	0.97646	0.211138	4.62476	3.75e-06	5.34e-05	yes	female
CG3356	3941.97	0.69	-0.545786	0.118075	-4.62239	3.79e-06	5.39e-05	yes	female
mthl10	592.42	1.47	0.556485	0.120423	4.62107	3.82e-06	5.42e-05	yes	female
wmd	6424.62	0.47	-1.08539	0.234877	-4.62109	3.82e-06	5.42e-05	yes	female
CG32808	136.291	0.62	-0.687369	0.148841	-4.61814	3.87e-06	5.48e-05	yes	female
Fer2LCH	6629.62	1.28	0.361693	0.0783209	4.6181	3.87e-06	5.48e-05	yes	female
CecB	160.19	2.24	1.1655	0.252663	4.61285	3.97e-06	5.62e-05	yes	female
TM4SF	7989.99	0.69	-0.529935	0.114896	-4.61231	3.98e-06	5.62e-05	yes	female
Prosalpha4	6644.68	0.68	-0.566965	0.122945	-4.61153	4e-06	5.64e-05	yes	female
Vha44	5681.42	0.66	-0.595298	0.12912	-4.61042	4.02e-06	5.66e-05	yes	female
Hsc70-3	9253.12	1.31	0.388286	0.0842255	4.61008	4.03e-06	5.67e-05	yes	female
loj	696.126	1.46	0.542452	0.117682	4.60946	4.04e-06	5.67e-05	yes	female
nAChRbeta3	943.01	0.66	-0.592714	0.128582	-4.60961	4.03e-06	5.67e-05	yes	female
CG10738	424.938	0.73	-0.445692	0.0967106	-4.60852	4.06e-06	5.69e-05	yes	female
CG33298	3824.57	0.77	-0.386353	0.0839027	-4.60478	4.13e-06	5.78e-05	yes	female
Tsf2	2473.26	1.25	0.324824	0.0705651	4.60319	4.16e-06	5.82e-05	yes	female
Dyrk2	6828.06	0.61	-0.723657	0.157254	-4.60183	4.19e-06	5.85e-05	yes	female
Herp	2129.12	0.8	-0.326947	0.0710567	-4.60121	4.2e-06	5.86e-05	yes	female
wbl	133.435	2.02	1.01393	0.220405	4.6003	4.22e-06	5.88e-05	yes	female
Lap1	1091.99	0.75	-0.416932	0.0906569	-4.59901	4.25e-06	5.91e-05	yes	female
snoRNA:Psi18S-1347b	383.017	2.08	1.05533	0.229496	4.59846	4.26e-06	5.92e-05	yes	female
ERp60	6982.61	1.44	0.522524	0.113659	4.59731	4.28e-06	5.95e-05	yes	female
eca	556.401	1.59	0.671664	0.146232	4.59315	4.37e-06	6.06e-05	yes	female
CG13124	5716.67	1.3	0.373504	0.0813776	4.58976	4.44e-06	6.15e-05	yes	female
DptA	2691.56	2.55	1.35238	0.294813	4.58725	4.49e-06	6.22e-05	yes	female
Taldo	10304.1	1.72	0.785451	0.171278	4.58582	4.52e-06	6.25e-05	yes	female
thw	246.531	0.48	-1.06377	0.231966	-4.58587	4.52e-06	6.25e-05	yes	female
Ugt86Dd	3316.82	1.79	0.841071	0.183498	4.58355	4.57e-06	6.31e-05	yes	female
Grasp65	1315.51	1.34	0.426723	0.0931403	4.58151	4.62e-06	6.37e-05	yes	female
CG4914	243.452	1.77	0.82109	0.179335	4.57853	4.68e-06	6.45e-05	yes	female
CG17549	4409.04	1.48	0.56777	0.124119	4.5744	4.78e-06	6.57e-05	yes	female
Sap130	2943.46	0.69	-0.543196	0.118804	-4.57221	4.83e-06	6.63e-05	yes	female
CG2862	1113.77	1.89	0.920228	0.201281	4.57186	4.83e-06	6.64e-05	yes	female
corn	5097.09	0.75	-0.423226	0.0926494	-4.56804	4.92e-06	6.75e-05	yes	female
CG6290	707.816	1.58	0.657647	0.14399	4.56732	4.94e-06	6.77e-05	yes	female
snoRNA:Psi28S-2648	6448.93	2.02	1.01646	0.222563	4.56706	4.95e-06	6.77e-05	yes	female
CG3267	951.962	1.4	0.489766	0.107306	4.56419	5.01e-06	6.85e-05	yes	female
psh	662.741	1.37	0.458507	0.100491	4.56268	5.05e-06	6.9e-05	yes	female
Obp56h	328.744	2.08	1.05887	0.23211	4.56192	5.07e-06	6.91e-05	yes	female
CG11852	2436.72	0.68	-0.550826	0.120795	-4.56	5.12e-06	6.95e-05	yes	female
CG7611	9880.08	0.79	-0.344443	0.0755365	-4.55996	5.12e-06	6.95e-05	yes	female
Rpn8	6760.74	0.59	-0.763659	0.167459	-4.56027	5.11e-06	6.95e-05	yes	female
Spase12	570.739	1.62	0.692551	0.151908	4.55902	5.14e-06	6.98e-05	yes	female
CG2493	1337.9	1.54	0.624041	0.136924	4.55758	5.17e-06	7.02e-05	yes	female
CG17786	377.419	0.51	-0.965394	0.211925	-4.55535	5.23e-06	7.08e-05	yes	female
Tg	1932.19	1.46	0.541478	0.118886	4.55461	5.25e-06	7.1e-05	yes	female
Gagr	233.186	0.59	-0.758022	0.166492	-4.55289	5.29e-06	7.15e-05	yes	female
hpRNA:CR18854	37482.8	0.71	-0.495603	0.108887	-4.55152	5.33e-06	7.19e-05	yes	female
CG8199	1217.05	1.64	0.716883	0.157519	4.5511	5.34e-06	7.2e-05	yes	female
Mcr	3834.24	1.28	0.354864	0.0779981	4.54965	5.37e-06	7.24e-05	yes	female
AGO3	46.4423	0.42	-1.2373	0.272059	-4.5479	5.42e-06	7.28e-05	yes	female
CG13796	3482.57	0.55	-0.854256	0.187841	-4.54776	5.42e-06	7.28e-05	yes	female
CG31769	3147.76	0.81	-0.307315	0.0675753	-4.54774	5.42e-06	7.28e-05	yes	female
dsb	1729.58	1.56	0.645473	0.141977	4.54631	5.46e-06	7.32e-05	yes	female
Nha2	665.256	1.79	0.839159	0.184594	4.54598	5.47e-06	7.33e-05	yes	female
Pex1	1095.41	1.25	0.320163	0.0704569	4.5441	5.52e-06	7.38e-05	yes	female
CG14629	3769.14	1.59	0.66517	0.146397	4.54362	5.53e-06	7.39e-05	yes	female
CG12560	720.467	1.52	0.602402	0.132632	4.54191	5.57e-06	7.44e-05	yes	female
CG8036	9673.62	1.35	0.438192	0.0964818	4.54171	5.58e-06	7.44e-05	yes	female
2020-09-05	494.632	0.68	-0.55355	0.121891	-4.54134	5.59e-06	7.45e-05	yes	female
b	7820.8	0.61	-0.708099	0.155965	-4.54013	5.62e-06	7.47e-05	yes	female
CG11444	1901.82	1.4	0.487138	0.10729	4.5404	5.61e-06	7.47e-05	yes	female
CG14945	5852.02	0.67	-0.572333	0.126049	-4.54054	5.61e-06	7.47e-05	yes	female
CG3534	1189.74	1.43	0.511555	0.112689	4.53953	5.64e-06	7.48e-05	yes	female
CG5789	3435.51	0.67	-0.58017	0.127807	-4.53942	5.64e-06	7.48e-05	yes	female
Spn	8005.86	0.74	-0.432321	0.0952692	-4.53789	5.68e-06	7.52e-05	yes	female
TER94	22802.1	0.64	-0.644203	0.142011	-4.53628	5.73e-06	7.57e-05	yes	female
PK1-R	110.778	0.53	-0.916329	0.202067	-4.53478	5.77e-06	7.62e-05	yes	female
Rpt1	9210.67	0.65	-0.619886	0.136835	-4.53017	5.89e-06	7.78e-05	yes	female
CR45811	79.7527	0.48	-1.04574	0.230947	-4.52804	5.95e-06	7.83e-05	yes	female
pck	712.686	1.34	0.422581	0.0933206	4.52827	5.95e-06	7.83e-05	yes	female
Sclp	16802.7	0.5	-1.00246	0.221392	-4.52798	5.95e-06	7.83e-05	yes	female
phtf	3174.85	0.65	-0.614425	0.135745	-4.52633	6e-06	7.89e-05	yes	female
PR-Set7	993.467	0.61	-0.719345	0.158955	-4.52546	6.03e-06	7.91e-05	yes	female
CG6583	468.248	1.62	0.693366	0.15326	4.5241	6.07e-06	7.95e-05	yes	female
CG33109	26.3363	2.15	1.10268	0.243846	4.52204	6.12e-06	8.02e-05	yes	female
CG32066	2068.4	0.72	-0.469905	0.103935	-4.52117	6.15e-06	8.04e-05	yes	female
sunn	10.1639	2.54	1.34684	0.297899	4.52114	6.15e-06	8.04e-05	yes	female
CG14569	117.487	0.4	-1.32684	0.293563	-4.51979	6.19e-06	8.07e-05	yes	female
Torsin	838.462	1.38	0.469333	0.103831	4.52015	6.18e-06	8.07e-05	yes	female
Kap3	2012.48	0.58	-0.778166	0.17222	-4.51845	6.23e-06	8.12e-05	yes	female
CG11842	594.976	1.55	0.636133	0.14085	4.5164	6.29e-06	8.18e-05	yes	female
CG14526	2006.95	0.76	-0.389357	0.0862105	-4.51636	6.29e-06	8.18e-05	yes	female
CG17754	18639.3	0.65	-0.614679	0.136125	-4.51555	6.32e-06	8.2e-05	yes	female
sel	649.936	1.65	0.719496	0.159413	4.51341	6.38e-06	8.28e-05	yes	female
GstE7	500.236	1.61	0.684697	0.151767	4.5115	6.44e-06	8.34e-05	yes	female
CG33056	1319.25	1.44	0.530128	0.117595	4.50808	6.54e-06	8.47e-05	yes	female
sigmar	1599.61	0.79	-0.342477	0.0759866	-4.50707	6.57e-06	8.5e-05	yes	female
CG15890	1563.18	0.77	-0.37384	0.0829611	-4.5062	6.6e-06	8.53e-05	yes	female
alphaTub85E	672.753	0.46	-1.11382	0.247218	-4.50541	6.62e-06	8.55e-05	yes	female
CG13675	43.2493	0.46	-1.11648	0.248048	-4.50106	6.76e-06	8.72e-05	yes	female
siz	3486.43	1.36	0.445484	0.0989935	4.50014	6.79e-06	8.75e-05	yes	female
ko	2000.93	0.63	-0.655175	0.145661	-4.49795	6.86e-06	8.83e-05	yes	female
CG13272	64.4704	2.07	1.05292	0.234198	4.49585	6.93e-06	8.9e-05	yes	female
Tep3	4618.45	1.19	0.248933	0.0553711	4.49572	6.93e-06	8.9e-05	yes	female
CG40470	738.378	1.49	0.578815	0.128805	4.49373	7e-06	8.98e-05	yes	female
CG9391	2533.25	1.53	0.616205	0.137135	4.49342	7.01e-06	8.98e-05	yes	female
Ice1	280.559	0.68	-0.559633	0.124753	-4.48594	7.26e-06	9.29e-05	yes	female
Sara	4696.81	0.77	-0.3795	0.0846187	-4.48482	7.3e-06	9.33e-05	yes	female
CG8080	692.485	1.41	0.497735	0.111001	4.48407	7.32e-06	9.35e-05	yes	female
CG18265	548.483	0.56	-0.840258	0.187415	-4.4834	7.35e-06	9.37e-05	yes	female
Hs3st-A	5774.99	0.68	-0.559521	0.124816	-4.48278	7.37e-06	9.38e-05	yes	female
sol	4028.64	0.71	-0.487452	0.10874	-4.48274	7.37e-06	9.38e-05	yes	female
Sec6	693.34	0.72	-0.464262	0.103575	-4.48236	7.38e-06	9.39e-05	yes	female
dsd	4699.47	0.83	-0.266846	0.0595627	-4.48009	7.46e-06	9.48e-05	yes	female
CG43351	692.103	1.97	0.975694	0.217861	4.47852	7.52e-06	9.53e-05	yes	female
Rpt5	8178.51	0.62	-0.678702	0.151547	-4.47848	7.52e-06	9.53e-05	yes	female
PGRP-SD	795.733	1.92	0.938253	0.209539	4.47769	7.55e-06	9.56e-05	yes	female
SmydA-5	147.366	1.7	0.768135	0.171605	4.47619	7.6e-06	9.62e-05	yes	female
CG7381	442.49	0.66	-0.607552	0.135744	-4.47572	7.62e-06	9.63e-05	yes	female
hid	474.744	0.57	-0.822778	0.183989	-4.47189	7.75e-06	9.79e-05	yes	female
Ubc7	1790.7	1.25	0.321913	0.0719912	4.47156	7.76e-06	9.8e-05	yes	female
CG13912	273.462	1.56	0.63776	0.142645	4.47097	7.79e-06	9.81e-05	yes	female
CG9018	400.495	0.68	-0.565004	0.126395	-4.47014	7.82e-06	9.84e-05	yes	female
Mondo	3261.96	1.29	0.372261	0.0833064	4.46858	7.87e-06	9.9e-05	yes	female
CG9313	60.2032	0.5	-0.992655	0.222158	-4.46824	7.89e-06	9.91e-05	yes	female
CG8369	13227.1	1.57	0.650564	0.1457	4.46508	8e-06	0.000100455	yes	female
MED19	1017.12	0.54	-0.88448	0.198102	-4.46477	8.02e-06	0.000100498	yes	female
Glo1	1024.44	1.51	0.59444	0.13316	4.46408	8.04e-06	0.000100716	yes	female
CG9541	249.865	0.57	-0.820704	0.183872	-4.46346	8.06e-06	0.000100908	yes	female
RpS12	11780.5	1.58	0.661912	0.148387	4.46072	8.17e-06	0.000102101	yes	female
Eaat2	8740.95	0.75	-0.412683	0.0925814	-4.45751	8.29e-06	0.000103535	yes	female
Srp14	521.839	1.41	0.490726	0.1101	4.45707	8.31e-06	0.000103643	yes	female
GlyS	8703.53	0.71	-0.502921	0.112864	-4.456	8.35e-06	0.000104059	yes	female
CG17350	476.471	0.63	-0.665404	0.149368	-4.45479	8.4e-06	0.000104539	yes	female
CG14280	168.805	0.52	-0.93661	0.210284	-4.45402	8.43e-06	0.00010481	yes	female
Manf	798.555	1.57	0.653762	0.146886	4.45082	8.55e-06	0.000106274	yes	female
ADD1	1364.71	0.78	-0.364805	0.0819898	-4.44939	8.61e-06	0.000106877	yes	female
Tep4	13287.5	1.31	0.393538	0.0884662	4.44846	8.65e-06	0.000107235	yes	female
Adi1	1257.01	1.69	0.756901	0.170415	4.44151	8.93e-06	0.000110643	yes	female
CG3088	8356.31	2.36	1.24042	0.279378	4.43995	9e-06	0.000111337	yes	female
CG1358	6115.84	0.75	-0.412683	0.0929839	-4.43822	9.07e-06	0.000112048	yes	female
CG42674	2212.95	0.75	-0.41057	0.0925093	-4.43815	9.07e-06	0.000112048	yes	female
Ube3a	1459.65	0.65	-0.615685	0.138855	-4.434	9.25e-06	0.00011411	yes	female
IRSp53	5345.1	0.74	-0.436323	0.0984655	-4.43123	9.37e-06	0.000115471	yes	female
CanA1	240.704	0.64	-0.644994	0.145584	-4.4304	9.41e-06	0.000115802	yes	female
pr	6677.29	0.6	-0.734355	0.165858	-4.42761	9.53e-06	0.00011719	yes	female
mspo	1505.74	0.62	-0.693037	0.156571	-4.42635	9.58e-06	0.000117759	yes	female
l(2)03659	62.5033	0.51	-0.965071	0.218056	-4.4258	9.61e-06	0.000117943	yes	female
bou	827.858	1.57	0.650167	0.146931	4.42498	9.64e-06	0.000118271	yes	female
CG14823	1235.12	1.38	0.464503	0.105011	4.42336	9.72e-06	0.000119046	yes	female
CG4168	2177.93	0.64	-0.646464	0.146244	-4.42045	9.85e-06	0.000120538	yes	female
CG7300	6286	0.65	-0.62716	0.141948	-4.41822	9.95e-06	0.000121666	yes	female
Asph	7120.71	0.48	-1.06278	0.240795	-4.41361	1.02e-05	0.000124165	yes	female
CG43861	830.632	0.72	-0.47982	0.108735	-4.41275	1.02e-05	0.000124414	yes	female
LKRSDH	2396.38	1.3	0.376863	0.0854005	4.41289	1.02e-05	0.000124414	yes	female
Fem-1	11268.9	0.62	-0.689639	0.156296	-4.41238	1.02e-05	0.000124503	yes	female
sxe2	2377.15	1.91	0.936096	0.212187	4.41166	1.03e-05	0.000124793	yes	female
CG14567	213.613	1.74	0.796592	0.180627	4.41014	1.03e-05	0.000125424	yes	female
Epac	3641.03	0.63	-0.673887	0.152799	-4.41029	1.03e-05	0.000125424	yes	female
CG14407	961.243	1.41	0.497891	0.112963	4.40756	1.05e-05	0.000126802	yes	female
kat-60L1	813.549	0.73	-0.460385	0.104536	-4.4041	1.06e-05	0.000128667	yes	female
Nlp	802.12	1.31	0.390753	0.0887274	4.40397	1.06e-05	0.000128667	yes	female
CG11835	324.601	0.62	-0.696842	0.158247	-4.4035	1.07e-05	0.000128816	yes	female
CG10527	6649.76	1.49	0.57135	0.12976	4.40314	1.07e-05	0.000128902	yes	female
GstO3	1002.14	1.48	0.567563	0.129098	4.39636	1.1e-05	0.000132863	yes	female
Hel25E	1469.74	1.36	0.447822	0.101948	4.39266	1.12e-05	0.000135018	yes	female
Der-1	1528.06	1.42	0.505087	0.115039	4.39059	1.13e-05	0.000136173	yes	female
Atg9	2761.73	0.71	-0.486209	0.110745	-4.39034	1.13e-05	0.000136197	yes	female
CG11309	2177.32	1.59	0.673343	0.153404	4.38936	1.14e-05	0.000136679	yes	female
CG31548	1056.85	1.68	0.74549	0.169923	4.38722	1.15e-05	0.000137891	yes	female
lbk	2993.85	0.78	-0.355475	0.0810323	-4.38683	1.15e-05	0.000138006	yes	female
CG11601	697.284	1.47	0.551706	0.125781	4.38624	1.15e-05	0.000138243	yes	female
ste24a	945.786	1.53	0.613148	0.139802	4.38582	1.16e-05	0.000138375	yes	female
CHOp24	2169.59	1.46	0.546428	0.124598	4.38554	1.16e-05	0.000138419	yes	female
CG13708	47.1905	0.51	-0.983948	0.224406	-4.38467	1.16e-05	0.00013879	yes	female
pncr016:2R	220.75	1.84	0.877352	0.200101	4.38454	1.16e-05	0.00013879	yes	female
Cp1	29699.7	1.25	0.31758	0.0724689	4.3823	1.17e-05	0.000140088	yes	female
ade2	7780.93	1.57	0.652962	0.149062	4.38047	1.18e-05	0.000141131	yes	female
2020-09-01	1227.59	0.77	-0.376991	0.0860758	-4.37976	1.19e-05	0.000141454	yes	female
comm3	374.804	0.7	-0.521139	0.119027	-4.37834	1.2e-05	0.00014224	yes	female
CG43163	1275.63	0.73	-0.456471	0.104322	-4.37562	1.21e-05	0.000143889	yes	female
Rpt6	5996.45	0.53	-0.908277	0.207587	-4.3754	1.21e-05	0.000143896	yes	female
CG1143	439.102	1.57	0.649922	0.14869	4.371	1.24e-05	0.0001464	yes	female
Fbxl7	1401.87	0.61	-0.707285	0.161807	-4.37118	1.24e-05	0.0001464	yes	female
melt	551.694	0.64	-0.638309	0.146025	-4.37124	1.24e-05	0.0001464	yes	female
bmm	3334.41	1.44	0.523825	0.119878	4.36965	1.24e-05	0.000147166	yes	female
CG2736	1730.35	1.68	0.747693	0.171274	4.36549	1.27e-05	0.000149766	yes	female
euc	1538.53	1.31	0.39067	0.0894923	4.36541	1.27e-05	0.000149766	yes	female
CG2918	3122.86	1.42	0.501409	0.114889	4.3643	1.28e-05	0.000150384	yes	female
Dscam3	2028.35	0.65	-0.623922	0.143019	-4.36252	1.29e-05	0.000151461	yes	female
Cyp6a14	321.475	1.63	0.701013	0.160718	4.36177	1.29e-05	0.00015175	yes	female
Scr	324.573	0.58	-0.794021	0.182044	-4.36169	1.29e-05	0.00015175	yes	female
CG9616	21.9014	2.46	1.30067	0.298297	4.36033	1.3e-05	0.000152548	yes	female
snoRNA:2R:9445205	2778.55	2.06	1.03964	0.23854	4.35836	1.31e-05	0.000153781	yes	female
CG32032	1735.19	1.38	0.46092	0.105773	4.35764	1.31e-05	0.00015414	yes	female
GstE6	1596.05	1.58	0.660404	0.151562	4.35733	1.32e-05	0.000154141	yes	female
LanB1	4977.34	0.78	-0.365916	0.0839793	-4.35722	1.32e-05	0.000154141	yes	female
CG7829	651.717	2.33	1.22149	0.28036	4.35686	1.32e-05	0.000154253	yes	female
ft	2530.09	0.71	-0.503744	0.115638	-4.35621	1.32e-05	0.000154565	yes	female
CG9194	139.806	0.64	-0.640717	0.147122	-4.35501	1.33e-05	0.00015526	yes	female
Ssb-c31a	436.905	1.77	0.824343	0.189391	4.35261	1.35e-05	0.000156827	yes	female
tRNA:Thr-AGT-2-1	16.4782	2.32	1.21667	0.27966	4.35053	1.36e-05	0.000158167	yes	female
CG1942	455.804	0.54	-0.881271	0.202728	-4.34705	1.38e-05	0.000159339	yes	female
CG30283	6.43771	0.41	-1.28843	0.296326	-4.34803	1.37e-05	0.000159339	yes	female
CR45973	70.3741	0.43	-1.21185	0.278767	-4.34719	1.38e-05	0.000159339	yes	female
CysRS	908.527	1.27	0.341956	0.0786525	4.34769	1.38e-05	0.000159339	yes	female
hpRNA:CR32207	246.781	1.66	0.732404	0.168474	4.34727	1.38e-05	0.000159339	yes	female
Lapsyn	638.686	0.67	-0.579679	0.133337	-4.34749	1.38e-05	0.000159339	yes	female
Prosbeta2	5940.77	0.67	-0.573809	0.131954	-4.34856	1.37e-05	0.000159339	yes	female
ry	1894.94	1.41	0.498942	0.114746	4.34823	1.37e-05	0.000159339	yes	female
Sply	867.185	1.32	0.397511	0.091434	4.34752	1.38e-05	0.000159339	yes	female
Pgm	6895.86	1.45	0.540382	0.124324	4.34655	1.38e-05	0.00015955	yes	female
CG9663	630.619	0.72	-0.476225	0.109577	-4.34602	1.39e-05	0.000159786	yes	female
CG3984	261.903	0.58	-0.795357	0.183069	-4.34458	1.4e-05	0.000160687	yes	female
Rpt4	6954.58	0.68	-0.559278	0.128811	-4.34184	1.41e-05	0.000162557	yes	female
bai	1869.03	1.4	0.48223	0.11118	4.33738	1.44e-05	0.000165733	yes	female
ImpL3	946.194	1.44	0.523724	0.120788	4.3359	1.45e-05	0.000166698	yes	female
Pdf	756.352	1.51	0.591956	0.136566	4.33459	1.46e-05	0.000167534	yes	female
GstO2	932.303	1.5	0.588762	0.135842	4.33416	1.46e-05	0.000167705	yes	female
CG12344	887.856	0.63	-0.658892	0.152175	-4.32982	1.49e-05	0.00017073	yes	female
RpL31	12134.6	1.58	0.664239	0.15341	4.32982	1.49e-05	0.00017073	yes	female
CG5549	3920.6	0.7	-0.523883	0.121063	-4.32737	1.51e-05	0.000172323	yes	female
RpL17	12889.6	1.44	0.523542	0.120984	4.32736	1.51e-05	0.000172323	yes	female
CG6567	471.798	1.5	0.585106	0.135282	4.32509	1.52e-05	0.000173945	yes	female
sei	1987.84	0.81	-0.300105	0.0694533	-4.32096	1.55e-05	0.000177066	yes	female
Uba3	400.887	1.46	0.541772	0.125394	4.32055	1.56e-05	0.000177236	yes	female
CCT1	1948.56	1.3	0.380467	0.0880803	4.31955	1.56e-05	0.000177878	yes	female
Acox57D-p	810.136	1.36	0.441252	0.102172	4.31871	1.57e-05	0.000178389	yes	female
Rad23	6125.91	0.73	-0.455266	0.105453	-4.31724	1.58e-05	0.000179247	yes	female
Sap-r	59366.1	0.72	-0.464796	0.107656	-4.31744	1.58e-05	0.000179247	yes	female
CG42259	287.937	1.55	0.631612	0.146331	4.31632	1.59e-05	0.000179829	yes	female
su(f)	1067.44	0.75	-0.417934	0.0968543	-4.31508	1.6e-05	0.000180674	yes	female
CG18467	1352.67	1.42	0.508811	0.117937	4.31428	1.6e-05	0.000181163	yes	female
CG9812	11386.6	1.3	0.383166	0.0888659	4.31173	1.62e-05	0.000183096	yes	female
CG13360	1554.15	2.38	1.25346	0.290728	4.31147	1.62e-05	0.000183147	yes	female
CG15865	7.60429	0.41	-1.2865	0.298432	-4.31087	1.63e-05	0.000183471	yes	female
alpha-Catr	2105.9	0.71	-0.501751	0.116493	-4.30714	1.65e-05	0.000186357	yes	female
CG32109	628.409	1.47	0.560687	0.13018	4.30701	1.65e-05	0.000186357	yes	female
Start1	2092.39	0.76	-0.401227	0.0931825	-4.30582	1.66e-05	0.000187198	yes	female
CS-2	6.58217	0.43	-1.22208	0.283859	-4.30523	1.67e-05	0.000187353	yes	female
d	532.805	0.69	-0.534759	0.124211	-4.30525	1.67e-05	0.000187353	yes	female
Atg101	3159.54	0.69	-0.544749	0.12656	-4.30426	1.68e-05	0.000188005	yes	female
AstA-R2	109.785	0.61	-0.717441	0.166801	-4.30119	1.7e-05	0.000190108	yes	female
CG7222	1752.64	0.8	-0.323276	0.0751549	-4.30146	1.7e-05	0.000190108	yes	female
Ho	8748.96	0.71	-0.500394	0.116333	-4.30138	1.7e-05	0.000190108	yes	female
prtp	3250.47	0.77	-0.377664	0.0878113	-4.30085	1.7e-05	0.000190221	yes	female
Pli	4280.38	0.78	-0.36749	0.0854641	-4.29994	1.71e-05	0.000190833	yes	female
cindr	4039.33	0.7	-0.507636	0.118079	-4.29912	1.71e-05	0.00019135	yes	female
RpL35	11815.8	1.51	0.598913	0.139317	4.29894	1.72e-05	0.00019135	yes	female
GILT2	871.785	1.79	0.839582	0.19538	4.29717	1.73e-05	0.00019271	yes	female
Cyp6t1	182.342	1.67	0.740219	0.172281	4.29659	1.73e-05	0.000193037	yes	female
Gem3	381.734	0.66	-0.593819	0.138266	-4.29476	1.75e-05	0.000194456	yes	female
Cbs	786.48	1.46	0.544812	0.126903	4.29315	1.76e-05	0.000195701	yes	female
CR43417	199.406	1.55	0.632157	0.147426	4.28795	1.8e-05	0.000200007	yes	female
NitFhit	679.036	1.4	0.484573	0.113009	4.28791	1.8e-05	0.000200007	yes	female
Mp	6749.7	0.65	-0.620432	0.144724	-4.28699	1.81e-05	0.000200656	yes	female
Sp7	1866.51	1.31	0.393504	0.091805	4.28631	1.82e-05	0.000201094	yes	female
Cyp28d1	6487.46	1.28	0.351005	0.0819429	4.28354	1.84e-05	0.000203433	yes	female
CG11077	647.017	1.52	0.606249	0.141666	4.27941	1.87e-05	0.000207052	yes	female
CG4593	419.689	1.56	0.643746	0.150484	4.27783	1.89e-05	0.000208338	yes	female
CG9507	1711.18	0.58	-0.794994	0.185867	-4.27721	1.89e-05	0.000208732	yes	female
l(1)G0289	7968.88	1.19	0.247154	0.0577944	4.27643	1.9e-05	0.000209276	yes	female
CG13397	764.055	1.57	0.653525	0.152975	4.27209	1.94e-05	0.000213147	yes	female
e(r)	1471.82	1.3	0.379105	0.0887461	4.27179	1.94e-05	0.000213147	yes	female
GstO1	281.545	1.38	0.463247	0.108444	4.27175	1.94e-05	0.000213147	yes	female
CG5191	3918.63	1.32	0.399474	0.0935386	4.27069	1.95e-05	0.000213232	yes	female
ea	476.745	1.88	0.90729	0.212435	4.2709	1.95e-05	0.000213232	yes	female
fa2h	107.498	0.54	-0.883777	0.206913	-4.27126	1.94e-05	0.000213232	yes	female
rost	1151.62	1.73	0.794011	0.185922	4.27067	1.95e-05	0.000213232	yes	female
Snmp2	472.862	1.36	0.448411	0.104994	4.27082	1.95e-05	0.000213232	yes	female
CG12003	122.769	0.42	-1.2575	0.294512	-4.26978	1.96e-05	0.000213894	yes	female
Ptp69D	2082.62	0.79	-0.332149	0.077801	-4.26921	1.96e-05	0.000214252	yes	female
RpS19a	9996.93	1.2	0.268937	0.0630079	4.2683	1.97e-05	0.000214933	yes	female
Lmpt	13097.9	0.8	-0.327057	0.076645	-4.26716	1.98e-05	0.000215844	yes	female
CR43609	47.5532	1.88	0.908732	0.213133	4.26368	2.01e-05	0.000219042	yes	female
Drsl5	2132.11	2	1.00311	0.235358	4.26205	2.03e-05	0.000220443	yes	female
sit	177.59	1.79	0.83687	0.19651	4.25867	2.06e-05	0.00022361	yes	female
dpr2	722.875	1.41	0.49946	0.117386	4.25484	2.09e-05	0.000227266	yes	female
CG3566	1210.79	1.61	0.685371	0.161097	4.25441	2.1e-05	0.000227503	yes	female
Ugt35a	543.192	1.78	0.832653	0.195876	4.25092	2.13e-05	0.00023088	yes	female
CR44321	30.4853	2.3	1.20229	0.282954	4.24908	2.15e-05	0.000232576	yes	female
CG13751	610.122	1.71	0.771005	0.181501	4.24794	2.16e-05	0.000233561	yes	female
CG6145	3281.76	0.69	-0.541327	0.12745	-4.24735	2.16e-05	0.000233968	yes	female
CG17746	4519.37	0.6	-0.730225	0.171975	-4.24611	2.18e-05	0.000235052	yes	female
CG42821	62.6552	2.18	1.12251	0.264406	4.24541	2.18e-05	0.000235585	yes	female
CG11899	3362.8	1.29	0.36398	0.0857447	4.24493	2.19e-05	0.000235882	yes	female
frm	1049.05	0.43	-1.22155	0.287958	-4.24211	2.21e-05	0.000238654	yes	female
cry	6652.59	1.57	0.646855	0.152542	4.2405	2.23e-05	0.000240163	yes	female
CG17278	469.019	1.52	0.600246	0.14159	4.23933	2.24e-05	0.000241212	yes	female
CR45242	17.5006	2.31	1.20798	0.285054	4.23772	2.26e-05	0.000242729	yes	female
nuf	5786.87	1.31	0.393008	0.0927487	4.23734	2.26e-05	0.000242928	yes	female
EndoA	6423.94	0.7	-0.515919	0.121804	-4.23566	2.28e-05	0.000244541	yes	female
Txl	3448.84	0.65	-0.613553	0.144931	-4.23343	2.3e-05	0.000246767	yes	female
RpL10	21439.2	1.33	0.414432	0.0979079	4.23288	2.31e-05	0.000247152	yes	female
CG12811	671.503	1.44	0.524934	0.124134	4.22877	2.35e-05	0.000251491	yes	female
CecC	454.091	2.16	1.11353	0.263385	4.22775	2.36e-05	0.000252197	yes	female
CG14818	1341.9	1.47	0.556928	0.131731	4.22777	2.36e-05	0.000252197	yes	female
CG4783	34.1427	0.47	-1.10132	0.260516	-4.22744	2.36e-05	0.000252318	yes	female
NPF	479.115	1.43	0.51886	0.122769	4.2263	2.38e-05	0.00025316	yes	female
Tango1	5176.45	0.77	-0.377528	0.0893253	-4.22645	2.37e-05	0.00025316	yes	female
Pxd	3665.64	0.55	-0.865385	0.204928	-4.22288	2.41e-05	0.000256814	yes	female
RpL41	30719.3	1.55	0.635301	0.150507	4.22106	2.43e-05	0.000258669	yes	female
CG8507	1722.26	1.35	0.432691	0.102517	4.22067	2.44e-05	0.000258677	yes	female
sky	801.192	1.43	0.514067	0.121794	4.22079	2.43e-05	0.000258677	yes	female
ex	686.079	1.3	0.381886	0.0904986	4.2198	2.45e-05	0.000259447	yes	female
by	2629.26	1.32	0.402468	0.0953994	4.21877	2.46e-05	0.000260033	yes	female
CG1698	1663.16	0.54	-0.88268	0.20923	-4.21871	2.46e-05	0.000260033	yes	female
CG5002	1095.87	0.58	-0.781346	0.185197	-4.219	2.45e-05	0.000260033	yes	female
RpS21	6730.76	1.56	0.639079	0.151549	4.21698	2.48e-05	0.000261804	yes	female
CG4496	163.952	0.58	-0.782164	0.185586	-4.21457	2.5e-05	0.000264387	yes	female
dare	561.796	0.74	-0.43014	0.102086	-4.21352	2.51e-05	0.000265396	yes	female
CG45002	6597.8	0.71	-0.500783	0.118873	-4.21276	2.52e-05	0.000265957	yes	female
CG7328	261.83	1.5	0.589331	0.139895	4.21266	2.52e-05	0.000265957	yes	female
CG16959	1162.78	0.63	-0.66504	0.157876	-4.21241	2.53e-05	0.00026602	yes	female
SamDC	1275.04	1.41	0.492261	0.116906	4.21074	2.55e-05	0.000267761	yes	female
jhamt	321.903	0.48	-1.05318	0.25022	-4.209	2.57e-05	0.000269604	yes	female
nemy	1940.76	0.79	-0.343182	0.0816341	-4.2039	2.62e-05	0.000275513	yes	female
CG15547	498.344	0.65	-0.613252	0.145915	-4.20279	2.64e-05	0.000276631	yes	female
CG1665	467.749	1.82	0.866656	0.206253	4.20191	2.65e-05	0.000277475	yes	female
Rif1	260.007	0.59	-0.773009	0.183983	-4.20153	2.65e-05	0.000277705	yes	female
knk	1661.87	0.61	-0.702924	0.167364	-4.19996	2.67e-05	0.000279401	yes	female
CG31776	7.45845	2.35	1.23284	0.293726	4.19723	2.7e-05	0.000282542	yes	female
ArgRS	1021.58	1.31	0.39268	0.0935638	4.19692	2.71e-05	0.000282698	yes	female
dan	214.896	0.68	-0.551211	0.131473	-4.19259	2.76e-05	0.000287904	yes	female
CG34229	214.193	1.65	0.723151	0.17254	4.1912	2.77e-05	0.00028918	yes	female
Gel	10323.8	1.3	0.377972	0.0901792	4.19135	2.77e-05	0.00028918	yes	female
CR44841	65.1126	0.52	-0.953447	0.227502	-4.19094	2.78e-05	0.000289269	yes	female
CG6180	2156.74	1.58	0.658517	0.157152	4.19031	2.79e-05	0.000289831	yes	female
p38a	335.39	1.4	0.490084	0.116963	4.19008	2.79e-05	0.000289875	yes	female
CG7456	1595.81	1.35	0.437871	0.104508	4.18983	2.79e-05	0.000289942	yes	female
Def	307.458	0.46	-1.11657	0.266539	-4.18913	2.8e-05	0.000290594	yes	female
Spase22-23	966.765	1.51	0.599139	0.143068	4.1878	2.82e-05	0.000292056	yes	female
spz	1256.2	1.41	0.494313	0.118066	4.18676	2.83e-05	0.000293154	yes	female
ps	7096.66	1.3	0.377566	0.0901946	4.18613	2.84e-05	0.00029372	yes	female
CG17211	772.275	0.7	-0.519301	0.124121	-4.18382	2.87e-05	0.000296473	yes	female
CG18335	26.5999	0.45	-1.14923	0.274733	-4.18308	2.88e-05	0.000297187	yes	female
Coop	383.439	0.66	-0.59919	0.143307	-4.18115	2.9e-05	0.00029911	yes	female
CR11538	26.0481	2.31	1.2079	0.288879	4.18134	2.9e-05	0.00029911	yes	female
Rab27	448.316	0.62	-0.68115	0.162914	-4.18104	2.9e-05	0.00029911	yes	female
Cyt-b5-r	14288.9	1.6	0.675709	0.161674	4.17947	2.92e-05	0.000300939	yes	female
fz	1482.65	0.73	-0.456787	0.109307	-4.17895	2.93e-05	0.000301365	yes	female
CG3792	803.463	1.57	0.651327	0.15604	4.17411	2.99e-05	0.000307588	yes	female
CG8785	3547.8	0.5	-1.00812	0.24159	-4.17287	3.01e-05	0.000309015	yes	female
dnd	973.153	0.43	-1.21098	0.290275	-4.17182	3.02e-05	0.000310172	yes	female
Trx-2	6069.88	1.33	0.409085	0.0980693	4.17139	3.03e-05	0.000310325	yes	female
vkg	13992.3	0.67	-0.578157	0.138603	-4.17133	3.03e-05	0.000310325	yes	female
CG9676	2970.75	2.21	1.14315	0.274106	4.17046	3.04e-05	0.000311253	yes	female
Gk1	1994.42	1.45	0.533741	0.128016	4.16932	3.06e-05	0.00031255	yes	female
PGRP-LF	722.446	1.53	0.610202	0.146368	4.16895	3.06e-05	0.000312807	yes	female
CG32523	1569.06	2.32	1.21159	0.290801	4.1664	3.09e-05	0.000316059	yes	female
CG2059	819.85	1.55	0.636287	0.152736	4.16592	3.1e-05	0.000316456	yes	female
CG13506	1638.42	1.29	0.363112	0.0872003	4.16412	3.13e-05	0.000318709	yes	female
rdhB	7216.53	1.46	0.541825	0.130215	4.16099	3.17e-05	0.000322829	yes	female
CG32726	506.551	1.94	0.958978	0.230485	4.1607	3.17e-05	0.000322971	yes	female
CG13321	17.0923	0.42	-1.24736	0.29996	-4.15842	3.2e-05	0.000325947	yes	female
CG42749	396.031	0.51	-0.977208	0.23502	-4.15798	3.21e-05	0.000326031	yes	female
Nup154	824.505	0.63	-0.668421	0.160752	-4.1581	3.21e-05	0.000326031	yes	female
CG7655	333.307	1.55	0.627883	0.151026	4.15744	3.22e-05	0.000326268	yes	female
cl	2168.24	1.38	0.468899	0.112785	4.15745	3.22e-05	0.000326268	yes	female
CG8323	703.867	0.77	-0.369009	0.0887662	-4.15708	3.22e-05	0.000326509	yes	female
CG12081	1174.26	0.73	-0.463291	0.111453	-4.15682	3.23e-05	0.000326612	yes	female
Argk	58898.4	1.51	0.595491	0.143355	4.15397	3.27e-05	0.000330441	yes	female
CG34171	62.2444	1.75	0.805176	0.193919	4.15212	3.29e-05	0.000332845	yes	female
CG32368	2606	0.59	-0.750656	0.180811	-4.1516	3.3e-05	0.000333339	yes	female
CG11961	976.582	1.38	0.469525	0.113152	4.1495	3.33e-05	0.000336131	yes	female
dpr20	677.078	0.62	-0.693832	0.167227	-4.14904	3.34e-05	0.000336537	yes	female
Cpr67B	6133.72	0.54	-0.895389	0.215855	-4.1481	3.35e-05	0.000337531	yes	female
RNaseX25	2273.23	1.29	0.36445	0.087862	4.14798	3.35e-05	0.000337531	yes	female
RpL36A	14518.4	1.59	0.672894	0.16224	4.14752	3.36e-05	0.000337667	yes	female
Rpn9	11197.6	0.66	-0.594023	0.143224	-4.14752	3.36e-05	0.000337667	yes	female
CG13026	27.7047	2.37	1.24449	0.300105	4.14686	3.37e-05	0.000338361	yes	female
Topors	564.544	0.64	-0.644552	0.155439	-4.14667	3.37e-05	0.000338371	yes	female
Capr	2613.82	0.66	-0.598462	0.144339	-4.14621	3.38e-05	0.000338767	yes	female
CG17855	72.4245	0.58	-0.774368	0.186845	-4.14444	3.41e-05	0.000341117	yes	female
CG7840	318.354	1.36	0.446658	0.107859	4.14114	3.46e-05	0.000345779	yes	female
CG6652	57.8812	0.45	-1.1411	0.275588	-4.14059	3.46e-05	0.000346328	yes	female
Gld	1011.29	1.48	0.560942	0.135555	4.13812	3.5e-05	0.000349799	yes	female
Galphaq	17304.2	0.8	-0.324618	0.0784617	-4.13728	3.51e-05	0.000350702	yes	female
Prpk	220.38	1.53	0.61617	0.148936	4.13715	3.52e-05	0.000350702	yes	female
CR43411	231.242	1.91	0.931664	0.225208	4.1369	3.52e-05	0.000350808	yes	female
CG12112	211.739	1.47	0.560656	0.135672	4.13244	3.59e-05	0.000357392	yes	female
Iris	914.286	2.36	1.23585	0.29914	4.13135	3.61e-05	0.000358801	yes	female
CG31549	1011.31	1.44	0.526479	0.127556	4.12742	3.67e-05	0.000364687	yes	female
pgant2	3194.38	0.71	-0.494007	0.119702	-4.12696	3.68e-05	0.00036512	yes	female
CG8891	385.441	1.49	0.577106	0.139845	4.12675	3.68e-05	0.000365165	yes	female
CG1673	3029.01	1.47	0.554806	0.134494	4.12514	3.71e-05	0.000367428	yes	female
sowah	1330.34	1.25	0.321416	0.0779292	4.12446	3.72e-05	0.000368214	yes	female
RpS15	12907.9	1.56	0.642358	0.155757	4.12411	3.72e-05	0.000368483	yes	female
Trxr-1	8969.93	1.37	0.452372	0.109706	4.12348	3.73e-05	0.0003692	yes	female
CG6503	8137.04	2.32	1.21242	0.294277	4.12001	3.79e-05	0.000374493	yes	female
CG7695	761.613	1.4	0.484155	0.117566	4.11816	3.82e-05	0.000377212	yes	female
CG11353	33.0301	1.99	0.99451	0.241513	4.11784	3.82e-05	0.000377433	yes	female
Ilp2	871.021	1.41	0.498102	0.120971	4.11753	3.83e-05	0.000377636	yes	female
CG7956	5213.64	0.72	-0.483207	0.11738	-4.1166	3.84e-05	0.000378855	yes	female
Nak	3211.55	0.78	-0.350084	0.0850779	-4.11486	3.87e-05	0.000381167	yes	female
pcs	3051.03	0.7	-0.505533	0.122856	-4.11483	3.87e-05	0.000381167	yes	female
Kah	790.172	0.51	-0.983595	0.239066	-4.11433	3.88e-05	0.000381687	yes	female
CG30098	131.84	2.35	1.2326	0.299628	4.11377	3.89e-05	0.000382305	yes	female
Men	19668	1.35	0.432099	0.105048	4.11333	3.9e-05	0.000382731	yes	female
CG16978	3288.94	1.6	0.678181	0.164906	4.11252	3.91e-05	0.000383773	yes	female
AP-1gamma	3941.52	1.4	0.484037	0.117712	4.11206	3.92e-05	0.000384224	yes	female
CG12991	3622.34	0.73	-0.456469	0.111084	-4.10922	3.97e-05	0.000388675	yes	female
Pat1	1585.97	0.76	-0.39162	0.0953223	-4.10838	3.98e-05	0.000389779	yes	female
e	22649.9	0.53	-0.915239	0.222825	-4.10744	4e-05	0.00039107	yes	female
CG14528	2188.85	0.55	-0.864241	0.210463	-4.10639	4.02e-05	0.000392533	yes	female
Btk29A	3391.23	0.64	-0.637271	0.155551	-4.09687	4.19e-05	0.000408688	yes	female
viaf	1074.84	1.34	0.424612	0.103707	4.09433	4.23e-05	0.000412875	yes	female
hfp	3145.57	0.75	-0.420747	0.102794	-4.0931	4.26e-05	0.000414746	yes	female
CG31268	19.97	2.26	1.17451	0.287013	4.09219	4.27e-05	0.000415721	yes	female
SP1173	4237.77	1.21	0.277779	0.0678792	4.09225	4.27e-05	0.000415721	yes	female
CG31937	1428.54	1.51	0.599165	0.146439	4.09155	4.28e-05	0.000416199	yes	female
Pmm2	426.672	1.59	0.66777	0.163204	4.09163	4.28e-05	0.000416199	yes	female
CG5527	504.164	1.56	0.64244	0.157024	4.09135	4.29e-05	0.000416231	yes	female
Pcyt2	1929.81	1.49	0.572008	0.139839	4.09048	4.3e-05	0.000417467	yes	female
kar	2450.07	1.31	0.384448	0.0940034	4.08973	4.32e-05	0.000418493	yes	female
CG9302	396.538	1.47	0.559754	0.136924	4.08805	4.35e-05	0.000420874	yes	female
SMC2	194.322	1.59	0.664824	0.16262	4.08821	4.35e-05	0.000420874	yes	female
CG6984	222.664	1.72	0.785382	0.192133	4.08771	4.36e-05	0.000421162	yes	female
ETHR	152.626	0.61	-0.707944	0.173219	-4.08698	4.37e-05	0.000421808	yes	female
ImpE1	192.88	0.61	-0.713775	0.174645	-4.08701	4.37e-05	0.000421808	yes	female
CG4341	4029.02	0.77	-0.384594	0.0941082	-4.08672	4.38e-05	0.000421947	yes	female
sals	630.996	0.57	-0.808737	0.197903	-4.08654	4.38e-05	0.000421947	yes	female
CR44404	269.46	2.29	1.19803	0.293572	4.08085	4.49e-05	0.000432071	yes	female
CG8034	2665	0.66	-0.603164	0.147847	-4.07965	4.51e-05	0.000433978	yes	female
MtnD	27.2485	2.28	1.18961	0.291822	4.0765	4.57e-05	0.000439541	yes	female
smt3	1654.18	1.39	0.475621	0.116716	4.07504	4.6e-05	0.000441965	yes	female
CG11555	312.01	1.43	0.51366	0.126106	4.07326	4.64e-05	0.000445024	yes	female
CG9911	1830.66	1.36	0.446872	0.109744	4.07196	4.66e-05	0.000447162	yes	female
Myd88	1815.31	0.69	-0.526343	0.12929	-4.07102	4.68e-05	0.000448625	yes	female
Spn43Aa	21.0553	2.17	1.1169	0.274531	4.0684	4.73e-05	0.000453332	yes	female
Su(var)205	1119.51	1.32	0.396517	0.0975048	4.06664	4.77e-05	0.000456416	yes	female
Ufm1	260.109	1.51	0.596546	0.14677	4.0645	4.81e-05	0.00046026	yes	female
RpL30	10430.8	1.55	0.632956	0.155753	4.06386	4.83e-05	0.000461181	yes	female
CG14372	1609.26	0.71	-0.492176	0.121121	-4.06351	4.83e-05	0.000461497	yes	female
CG8858	2806.92	0.72	-0.471865	0.116154	-4.06239	4.86e-05	0.000463357	yes	female
mtg	388.659	0.75	-0.419408	0.103314	-4.05953	4.92e-05	0.000468714	yes	female
colt	3238.84	1.53	0.610859	0.150486	4.05924	4.92e-05	0.000468938	yes	female
CG17104	534.148	0.64	-0.653163	0.160919	-4.05895	4.93e-05	0.000469145	yes	female
CG13516	215.643	1.41	0.495428	0.122078	4.05829	4.94e-05	0.000470117	yes	female
CG6749	191.13	1.42	0.503334	0.124067	4.05694	4.97e-05	0.000472474	yes	female
CR45600	1070.14	0.65	-0.629261	0.155137	-4.05618	4.99e-05	0.000473654	yes	female
Doa	10425.8	0.57	-0.822018	0.202835	-4.05265	5.06e-05	0.000480491	yes	female
Got2	10797.8	1.25	0.322375	0.0796318	4.04831	5.16e-05	0.000489089	yes	female
kune	994.831	1.41	0.496101	0.122648	4.04493	5.23e-05	0.000495835	yes	female
CG9384	2475	0.77	-0.384916	0.0951842	-4.04391	5.26e-05	0.000497601	yes	female
ago	4475.18	0.82	-0.277708	0.0687132	-4.04156	5.31e-05	0.000502228	yes	female
Ktl	6885.86	0.82	-0.293634	0.0726642	-4.04097	5.32e-05	0.000503115	yes	female
boca	685.919	1.55	0.635618	0.157315	4.04043	5.34e-05	0.00050389	yes	female
Prosbeta4	4236.52	0.7	-0.513683	0.1272	-4.0384	5.38e-05	0.000507882	yes	female
HP1D3csd	19.2296	2.19	1.13255	0.280502	4.0376	5.4e-05	0.000508935	yes	female
ND-MWFE	3133.82	1.55	0.630463	0.15615	4.03755	5.4e-05	0.000508935	yes	female
CG2678	67.8034	1.89	0.920115	0.227913	4.03713	5.41e-05	0.000509461	yes	female
Sox21b	335.811	0.67	-0.577541	0.143144	-4.03469	5.47e-05	0.000514378	yes	female
CG11409	276.618	0.71	-0.485161	0.120262	-4.03419	5.48e-05	0.0005147	yes	female
CG33993	648.968	0.76	-0.392336	0.0972501	-4.0343	5.48e-05	0.0005147	yes	female
CG31121	1392.21	0.76	-0.386786	0.0958927	-4.03353	5.49e-05	0.000515748	yes	female
CG43394	2440.82	0.67	-0.577378	0.143255	-4.03042	5.57e-05	0.000522209	yes	female
RpII215	2560.85	1.21	0.279417	0.0693704	4.0279	5.63e-05	0.000527448	yes	female
CG33203	1991.22	0.78	-0.354294	0.0879873	-4.02665	5.66e-05	0.000529337	yes	female
CR44089	7.81757	2.3	1.20069	0.298195	4.02652	5.66e-05	0.000529337	yes	female
E(z)	1093.44	1.24	0.305803	0.0759467	4.02654	5.66e-05	0.000529337	yes	female
Ugt86Di	75.79	1.67	0.736601	0.182989	4.02538	5.69e-05	0.000531495	yes	female
CG9527	2643.45	1.24	0.316116	0.0785361	4.02511	5.69e-05	0.000531712	yes	female
CG15760	1866.05	0.71	-0.48645	0.120882	-4.02417	5.72e-05	0.000533432	yes	female
Cpr49Ag	1054.4	1.4	0.490432	0.121949	4.02163	5.78e-05	0.000538806	yes	female
CG5110	806.16	1.49	0.571114	0.142051	4.02049	5.81e-05	0.000541013	yes	female
Su(z)12	600.703	0.7	-0.516542	0.12853	-4.01884	5.85e-05	0.000544406	yes	female
Hn	7624.79	1.47	0.559095	0.139161	4.0176	5.88e-05	0.000546851	yes	female
btl	1028.58	0.78	-0.363374	0.090462	-4.01686	5.9e-05	0.000548158	yes	female
CG18869	49.3907	1.9	0.925202	0.230418	4.01533	5.94e-05	0.000550954	yes	female
CG3270	1174.66	0.68	-0.55632	0.138555	-4.01516	5.94e-05	0.000550954	yes	female
Myo81F	624.391	0.69	-0.533856	0.132961	-4.01513	5.94e-05	0.000550954	yes	female
Tsp42Ei	1088.69	1.34	0.423601	0.105592	4.01166	6.03e-05	0.000558696	yes	female
Ciao1	1328.93	0.79	-0.337074	0.0840403	-4.01086	6.05e-05	0.000560172	yes	female
CG13318	456.574	0.69	-0.530216	0.132208	-4.01047	6.06e-05	0.000560664	yes	female
CR42868	88.5289	1.98	0.983311	0.245304	4.00855	6.11e-05	0.000564828	yes	female
CG6592	46.1413	0.44	-1.19097	0.297123	-4.00834	6.11e-05	0.000564886	yes	female
CG13056	1188.78	0.72	-0.476722	0.118973	-4.00697	6.15e-05	0.000567766	yes	female
GstS1	3495.95	1.38	0.462441	0.115449	4.00558	6.19e-05	0.000570669	yes	female
zetaCOP	1310.76	1.5	0.581324	0.145136	4.00537	6.19e-05	0.000570757	yes	female
Jheh2	3568.57	1.52	0.600077	0.149913	4.00285	6.26e-05	0.00057645	yes	female
CG44014	768.757	1.59	0.669359	0.167235	4.00252	6.27e-05	0.000576822	yes	female
CG12158	6664.36	1.55	0.630636	0.157569	4.00227	6.27e-05	0.000576985	yes	female
l(2)01289	6989.85	0.59	-0.767259	0.191777	-4.00079	6.31e-05	0.000580181	yes	female
CR43241	173.914	1.53	0.617039	0.154265	3.99988	6.34e-05	0.00058198	yes	female
Zw	1093.05	1.38	0.461231	0.115385	3.99732	6.41e-05	0.000587852	yes	female
CG30389	2915.02	0.8	-0.321202	0.0803996	-3.99507	6.47e-05	0.000592593	yes	female
CG8401	115.801	1.61	0.688403	0.172313	3.99508	6.47e-05	0.000592593	yes	female
CG13065	807.891	0.56	-0.840275	0.210389	-3.99391	6.5e-05	0.000595047	yes	female
RhoGAP15B	1710.21	0.7	-0.510937	0.128049	-3.99018	6.6e-05	0.000604046	yes	female
CG33303	1281.42	1.54	0.62153	0.15578	3.98979	6.61e-05	0.000604123	yes	female
CG3812	3640.43	1.35	0.43355	0.10866	3.98997	6.61e-05	0.000604123	yes	female
CG3764	2536.87	0.74	-0.425763	0.106741	-3.98876	6.64e-05	0.000606301	yes	female
CG8132	728.962	1.46	0.548843	0.137605	3.98854	6.65e-05	0.000606425	yes	female
Pex14	490.726	1.38	0.467032	0.117137	3.98706	6.69e-05	0.000609763	yes	female
Dhfr	230.517	1.63	0.705417	0.176935	3.98687	6.69e-05	0.000609794	yes	female
28SrRNA-Psi:CR41609	92.0402	1.84	0.87835	0.22055	3.98254	6.82e-05	0.000620568	yes	female
CG7255	1046.43	0.79	-0.345306	0.0867509	-3.98043	6.88e-05	0.000625637	yes	female
Jafrac2	113.94	1.67	0.739009	0.185693	3.97974	6.9e-05	0.000626988	yes	female
sba	1783.6	0.76	-0.396	0.0995466	-3.97804	6.95e-05	0.000631018	yes	female
CR44111	10.5837	0.44	-1.18225	0.297239	-3.97744	6.97e-05	0.000631863	yes	female
Oseg1	430.708	0.73	-0.462622	0.116313	-3.97737	6.97e-05	0.000631863	yes	female
RpS23	21633.2	1.53	0.615527	0.15479	3.97653	6.99e-05	0.000633629	yes	female
CG30440	734.905	0.73	-0.450308	0.113296	-3.97461	7.05e-05	0.000638307	yes	female
CG32772	1935.95	0.78	-0.361544	0.0909912	-3.97339	7.09e-05	0.000641096	yes	female
CG42246	168.147	1.6	0.682028	0.17168	3.97267	7.11e-05	0.000642563	yes	female
Bsg25D	2397.13	0.76	-0.393122	0.0990279	-3.96981	7.19e-05	0.000649844	yes	female
Uch-L5	2903.67	0.59	-0.761664	0.191935	-3.96835	7.24e-05	0.000653377	yes	female
CG44286	150.794	0.57	-0.81379	0.205146	-3.96687	7.28e-05	0.000656948	yes	female
Cyp12e1	496.698	1.52	0.599529	0.15118	3.96567	7.32e-05	0.000659787	yes	female
CG11836	56.1946	1.81	0.853789	0.215357	3.96453	7.35e-05	0.00066245	yes	female
CG11134	475.291	1.6	0.681587	0.171978	3.96322	7.39e-05	0.00066563	yes	female
CG42376	537.388	1.45	0.539105	0.136076	3.96178	7.44e-05	0.000669167	yes	female
Ccp84Aa	22.3127	2.09	1.06345	0.268542	3.96009	7.49e-05	0.000673404	yes	female
CG17028	65.873	1.69	0.753716	0.190403	3.95853	7.54e-05	0.00067733	yes	female
CG13364	1403.47	1.47	0.552202	0.139513	3.95808	7.56e-05	0.000677893	yes	female
CG13887	2650.99	1.22	0.282881	0.0714709	3.95798	7.56e-05	0.000677893	yes	female
scu	2635.83	1.34	0.42648	0.107791	3.95655	7.6e-05	0.000681486	yes	female
Reck	1337.79	0.79	-0.341051	0.0862167	-3.95574	7.63e-05	0.000683283	yes	female
CG8498	821.138	1.57	0.652572	0.165023	3.95443	7.67e-05	0.000686554	yes	female
RpS29	25769.4	1.53	0.61416	0.155369	3.95291	7.72e-05	0.000690428	yes	female
CG13560	4.72339	2.15	1.10348	0.279278	3.95121	7.78e-05	0.000694844	yes	female
nub	349.963	0.54	-0.895966	0.226839	-3.94979	7.82e-05	0.000698078	yes	female
sona	1072.16	0.65	-0.632007	0.160012	-3.94975	7.82e-05	0.000698078	yes	female
FucT6	3682.05	0.68	-0.561297	0.142116	-3.94957	7.83e-05	0.000698081	yes	female
atk	299.914	2.07	1.04674	0.265154	3.94765	7.89e-05	0.000702784	yes	female
CG14258	168.167	0.52	-0.935834	0.237063	-3.94762	7.89e-05	0.000702784	yes	female
mRpS25	520.091	1.46	0.541046	0.137109	3.94611	7.94e-05	0.000706714	yes	female
pall	613.41	1.31	0.386515	0.0980431	3.9423	8.07e-05	0.000717526	yes	female
CR46246	17.8547	2.24	1.165	0.295597	3.9412	8.11e-05	0.000720305	yes	female
Fas1	18499.7	0.74	-0.440733	0.111836	-3.94088	8.12e-05	0.000720747	yes	female
RfC38	199.379	1.48	0.568679	0.144444	3.93703	8.25e-05	0.000731874	yes	female
Cyp4ac3	404.747	0.64	-0.648558	0.164812	-3.93513	8.32e-05	0.000737144	yes	female
CG9005	9387.16	0.63	-0.667489	0.16986	-3.92964	8.51e-05	0.00075365	yes	female
Drice	1770.09	0.7	-0.52117	0.132632	-3.92943	8.51e-05	0.000753744	yes	female
CG12321	2419.65	0.67	-0.579991	0.147708	-3.92661	8.62e-05	0.000762081	yes	female
NKAIN	3558.1	0.68	-0.557473	0.141997	-3.92595	8.64e-05	0.000763626	yes	female
Gfat2	2057.02	1.39	0.470294	0.119822	3.92493	8.68e-05	0.000766312	yes	female
ChAT	3690.85	0.64	-0.633544	0.161451	-3.92405	8.71e-05	0.000768564	yes	female
Mip	779.874	1.45	0.537624	0.13703	3.92339	8.73e-05	0.000770139	yes	female
CG9921	866.853	1.48	0.561293	0.143091	3.92264	8.76e-05	0.000771993	yes	female
CG15923	130.436	0.65	-0.615602	0.156954	-3.92218	8.78e-05	0.000772901	yes	female
CG4115	1612.81	0.56	-0.846554	0.215867	-3.92165	8.79e-05	0.000774063	yes	female
CG12995	135.065	1.6	0.680792	0.17363	3.92094	8.82e-05	0.000775777	yes	female
CG15343	104.757	1.6	0.677379	0.172821	3.91954	8.87e-05	0.000779752	yes	female
CG14695	59.6465	1.7	0.762926	0.194763	3.91719	8.96e-05	0.000786815	yes	female
CG15201	4396.69	1.53	0.615503	0.157145	3.91679	8.97e-05	0.00078755	yes	female
gom	31.429	2.06	1.04321	0.266503	3.91444	9.06e-05	0.000794703	yes	female
RanBPM	3667.1	0.75	-0.423835	0.108293	-3.91376	9.09e-05	0.000796372	yes	female
CG5555	2514.86	0.74	-0.436003	0.111445	-3.91227	9.14e-05	0.000800176	yes	female
Jwa	3048.93	1.36	0.441131	0.112756	3.91227	9.14e-05	0.000800176	yes	female
lcs	308.201	2.25	1.17182	0.299582	3.91151	9.17e-05	0.000802133	yes	female
snoRNA:Me28S-G2703b	33.8131	0.44	-1.17062	0.299308	-3.9111	9.19e-05	0.000802911	yes	female
CG34457	11.456	0.45	-1.16016	0.296852	-3.9082	9.3e-05	0.00081202	yes	female
RpS24	9162.77	1.31	0.39503	0.101083	3.90798	9.31e-05	0.000812202	yes	female
Cyp4d2	1808.66	1.41	0.493324	0.126246	3.90765	9.32e-05	0.000812733	yes	female
Fur2	7744.35	0.71	-0.493464	0.126332	-3.9061	9.38e-05	0.000817355	yes	female
CG9231	1186.02	1.48	0.568939	0.145694	3.90502	9.42e-05	0.000820447	yes	female
Nph	667.984	1.37	0.449983	0.115268	3.90379	9.47e-05	0.000824048	yes	female
CR44998	71.6416	1.68	0.751698	0.192597	3.90297	9.5e-05	0.000826262	yes	female
dpr5	493.518	0.69	-0.539479	0.138233	-3.90269	9.51e-05	0.000826635	yes	female
pes	2644.88	0.78	-0.361651	0.0926787	-3.9022	9.53e-05	0.00082771	yes	female
CR40354	16.8601	0.47	-1.09438	0.280466	-3.902	9.54e-05	0.000827823	yes	female
CG44004	36.2194	1.88	0.913833	0.234209	3.90179	9.55e-05	0.000827956	yes	female
eya	2298.36	0.87	-0.207869	0.0532788	-3.90153	9.56e-05	0.000828255	yes	female
RpS5a	21021.7	1.45	0.534605	0.137094	3.89956	9.64e-05	0.00083443	yes	female
CG13305	245.616	1.63	0.701423	0.179882	3.89934	9.65e-05	0.000834597	yes	female
CG11841	1541.68	1.5	0.580856	0.149003	3.89827	9.69e-05	0.00083673	yes	female
CG4213	4264.17	0.62	-0.694945	0.178266	-3.89837	9.68e-05	0.00083673	yes	female
Thiolase	5256.89	1.43	0.520915	0.133629	3.89821	9.69e-05	0.00083673	yes	female
Trpgamma	71.3885	0.59	-0.771926	0.198079	-3.89706	9.74e-05	0.000840144	yes	female
CG13670	43.6884	0.56	-0.848184	0.217732	-3.89555	9.8e-05	0.000844807	yes	female
CG6201	204.688	1.5	0.58646	0.150597	3.89425	9.85e-05	0.000848758	yes	female
ZnT77C	281.048	1.4	0.487666	0.125261	3.8932	9.89e-05	0.000851816	yes	female
Cyp4ac1	490.426	2.21	1.14452	0.29406	3.89214	9.94e-05	0.000854948	yes	female
Rpn10	9206.56	0.72	-0.482088	0.12393	-3.89	0.000100246	0.000861946	yes	female
drl	712.449	0.68	-0.566488	0.145648	-3.88944	0.000100478	0.000863337	yes	female
l(2)not	274.873	1.56	0.643637	0.165593	3.88685	0.000101552	0.000871953	yes	female
Ufd4	19536.7	0.72	-0.466433	0.120018	-3.88637	0.000101752	0.000873066	yes	female
sra	2612.28	1.29	0.36756	0.0946124	3.8849	0.00010237	0.000877755	yes	female
CG34190	3.92441	2.1	1.07145	0.275856	3.8841	0.000102708	0.000879425	yes	female
RpL6	19214.5	1.34	0.418381	0.107713	3.88424	0.000102652	0.000879425	yes	female
CG3618	3372.75	0.77	-0.369179	0.0950686	-3.88329	0.000103051	0.000881745	yes	female
CG8128	2902.78	0.55	-0.860437	0.221606	-3.88274	0.000103287	0.000883152	yes	female
CG10960	7302.21	1.26	0.332053	0.0855282	3.88238	0.000103438	0.000883829	yes	female
CG43448	126.931	2.05	1.03901	0.267657	3.88189	0.000103647	0.000884998	yes	female
CG12885	46.1888	0.49	-1.02435	0.264028	-3.87969	0.00010459	0.000892425	yes	female
CG10958	180.367	0.66	-0.60062	0.154975	-3.8756	0.000106364	0.000906937	yes	female
Adk2	2911.6	1.4	0.490393	0.126614	3.87314	0.000107442	0.000915489	yes	female
Adk1	8816.47	0.67	-0.577155	0.149035	-3.8726	0.000107679	0.000916872	yes	female
CG10576	4143.31	1.25	0.319484	0.0825125	3.87195	0.000107969	0.000918075	yes	female
IMPPP	7.87095	2.21	1.14235	0.295028	3.87202	0.000107936	0.000918075	yes	female
Damm	11.4563	2.23	1.16002	0.299702	3.87059	0.000108573	0.000922568	yes	female
Blimp-1	1726.86	0.66	-0.598996	0.154832	-3.86867	0.000109429	0.000929205	yes	female
CG8204	266.125	1.55	0.631685	0.163296	3.86835	0.000109572	0.000929472	yes	female
Tim9a	369.344	1.45	0.534087	0.138069	3.86827	0.000109612	0.000929472	yes	female
ubl	384.599	1.48	0.566895	0.146589	3.86725	0.000110071	0.000932718	yes	female
RpS20	10531.5	1.46	0.547529	0.141615	3.86633	0.000110487	0.000935599	yes	female
RpS7	24294.2	1.47	0.554121	0.143414	3.86379	0.000111643	0.000944735	yes	female
Obp83g	510.801	1.41	0.49704	0.128658	3.86327	0.000111878	0.000946072	yes	female
pcx	3218.87	0.66	-0.603573	0.15629	-3.86188	0.000112518	0.000950835	yes	female
RpL21	24480.6	1.46	0.544677	0.14109	3.86049	0.000113162	0.000955612	yes	female
Uev1A	5477.26	1.26	0.332942	0.0862689	3.85935	0.000113691	0.000959427	yes	female
CG9498	1371.01	1.54	0.626967	0.162476	3.85884	0.000113928	0.000960768	yes	female
CG32263	5.68952	2.13	1.09383	0.283483	3.85855	0.00011406	0.000961217	yes	female
CG10343	389.229	1.32	0.397535	0.103049	3.85774	0.000114442	0.000963773	yes	female
CG9691	11839.1	1.47	0.558761	0.144871	3.85695	0.000114809	0.000966206	yes	female
CG1315	117.621	2.2	1.13731	0.294937	3.85612	0.000115203	0.000968853	yes	female
CG10444	2935.87	1.38	0.465028	0.120624	3.85518	0.000115642	0.000971886	yes	female
mino	4808.77	1.27	0.345746	0.0896898	3.85491	0.000115772	0.000972312	yes	female
CG14153	929.3	1.5	0.58906	0.152842	3.85403	0.000116188	0.000975138	yes	female
CG34212	9.15871	2.17	1.11583	0.289586	3.85318	0.000116592	0.000977861	yes	female
GNBP1	840.566	1.33	0.409547	0.106306	3.85252	0.000116906	0.000979829	yes	female
CG10467	292.774	1.44	0.524833	0.13626	3.85169	0.000117306	0.000981841	yes	female
Urm1	126.878	1.59	0.664979	0.17264	3.85182	0.000117241	0.000981841	yes	female
CG6847	958.297	0.72	-0.481148	0.124945	-3.85088	0.000117692	0.000984397	yes	female
blow	1263.32	0.7	-0.514898	0.133817	-3.84777	0.0001192	0.000995659	yes	female
Vdup1	3733.99	0.77	-0.374433	0.0973084	-3.8479	0.000119135	0.000995659	yes	female
Mob4	1667.78	0.83	-0.267668	0.0695985	-3.84589	0.000120116	0.00100262	yes	female
CG14997	1055.66	1.49	0.574249	0.149326	3.84561	0.00012025	0.00100307	yes	female
Obp49a	1224.19	1.64	0.711891	0.185198	3.84396	0.000121067	0.00100919	yes	female
Cpr	6883.34	0.7	-0.516515	0.134396	-3.84325	0.000121417	0.00101143	yes	female
CG9396	1448.84	1.52	0.607975	0.158205	3.84295	0.000121563	0.00101196	yes	female
CG13319	283.033	0.7	-0.521631	0.135753	-3.84252	0.000121779	0.00101307	yes	female
pasi1	335.796	1.5	0.588684	0.153219	3.8421	0.000121984	0.00101409	yes	female
CG14573	8.21425	0.46	-1.13545	0.295649	-3.84053	0.000122771	0.00101994	yes	female
CG32649	1512.1	1.26	0.335598	0.0874235	3.83876	0.000123659	0.00102662	yes	female
miple1	12395	1.25	0.320748	0.0835596	3.83855	0.000123765	0.0010268	yes	female
pn	858.129	1.48	0.566197	0.147583	3.83646	0.000124819	0.00103485	yes	female
blot	2715.06	0.85	-0.237425	0.0619085	-3.83509	0.000125519	0.00103995	yes	female
CG3348	120.134	2.12	1.08384	0.282627	3.83488	0.000125624	0.00104013	yes	female
tRNA:His-GTG-2-1Psi	12.5039	2.2	1.13451	0.295875	3.83442	0.000125859	0.00104137	yes	female
Prosbeta3	4939.62	0.73	-0.455401	0.118836	-3.83217	0.000127017	0.00105024	yes	female
CG10166	649.976	1.42	0.505902	0.132074	3.83043	0.000127917	0.00105697	yes	female
RpLP0	20259.6	1.32	0.402463	0.105086	3.82983	0.000128233	0.00105887	yes	female
CrzR	457.782	0.63	-0.662349	0.172975	-3.82916	0.00012858	0.00106102	yes	female
dlp	1385.73	0.79	-0.34279	0.0895326	-3.82867	0.000128839	0.00106245	yes	female
haf	1146.44	0.69	-0.527236	0.137768	-3.82699	0.000129722	0.00106901	yes	female
CG3209	2332.07	1.23	0.303929	0.0794819	3.82387	0.000131371	0.00108187	yes	female
CG14411	978.997	0.76	-0.393254	0.102869	-3.82286	0.000131915	0.00108562	yes	female
Fife	4509.81	0.64	-0.638664	0.167238	-3.8189	0.000134051	0.00110246	yes	female
CG3625	4293.81	1.39	0.471883	0.123628	3.81695	0.000135111	0.0011097	yes	female
P5cr-2	975.751	1.64	0.711988	0.186529	3.81704	0.000135064	0.0011097	yes	female
poly	1027.89	1.46	0.545453	0.142921	3.81645	0.000135384	0.0011112	yes	female
GstE4	989.25	0.47	-1.08406	0.284065	-3.81624	0.000135503	0.00111143	yes	female
CG7483	1181.76	1.35	0.428899	0.112441	3.81445	0.000136487	0.00111875	yes	female
CG16898	129.633	1.64	0.710279	0.186225	3.81409	0.000136684	0.00111962	yes	female
Gtp-bp	2756.81	1.24	0.307958	0.0807585	3.81331	0.000137117	0.00112242	yes	female
Eip74EF	1775.68	0.7	-0.504912	0.132439	-3.81241	0.00013762	0.00112579	yes	female
CG15083	554.918	1.55	0.631099	0.16557	3.81168	0.000138026	0.00112761	yes	female
CG33169	267.211	1.58	0.659421	0.172995	3.81179	0.000137964	0.00112761	yes	female
Ppa	1224.17	0.65	-0.629681	0.165242	-3.81065	0.000138599	0.00113154	yes	female
CG45105	246.013	0.67	-0.582167	0.152816	-3.80958	0.000139202	0.00113571	yes	female
Sodh-1	4397.83	1.62	0.697308	0.183087	3.80861	0.00013975	0.00113942	yes	female
Arpc4	1027.35	1.47	0.551894	0.144914	3.80841	0.000139861	0.00113957	yes	female
NaPi-III	10621.9	0.77	-0.377011	0.0990058	-3.80797	0.000140115	0.00114088	yes	female
Cpr11B	2096.71	0.62	-0.681151	0.178982	-3.80569	0.000141412	0.00115068	yes	female
tank	999.606	0.82	-0.283093	0.0744222	-3.80388	0.000142449	0.00115835	yes	female
COQ7	800.793	1.36	0.447501	0.117664	3.80321	0.000142831	0.00116005	yes	female
Hmgcr	3372.6	0.82	-0.288945	0.0759765	-3.80309	0.000142903	0.00116005	yes	female
ND-13B	2756.34	1.41	0.497848	0.130908	3.80302	0.000142941	0.00116005	yes	female
CG17298	210.418	0.48	-1.05384	0.277129	-3.8027	0.00014313	0.00116082	yes	female
CG34355	4896.46	0.67	-0.568753	0.149583	-3.80225	0.000143386	0.00116213	yes	female
Tusp	1932.99	0.7	-0.519104	0.136538	-3.8019	0.000143588	0.001163	yes	female
sut1	923.685	0.77	-0.370475	0.0974555	-3.80148	0.000143835	0.00116423	yes	female
PDCD-5	336.75	1.36	0.444332	0.116942	3.7996	0.000144927	0.0011723	yes	female
CG8329	749.157	2.17	1.11628	0.293895	3.79824	0.00014573	0.00117801	yes	female
CG40191	3041.47	1.23	0.300785	0.0791983	3.79787	0.000145942	0.00117818	yes	female
MKP-4	573.898	0.75	-0.41343	0.108858	-3.79788	0.00014594	0.00117818	yes	female
CG10737	4717.19	0.85	-0.240584	0.0633536	-3.79747	0.000146178	0.00117931	yes	female
CG11529	75.7905	2	0.997454	0.262783	3.79573	0.000147208	0.00118684	yes	female
CG8180	2288.71	0.78	-0.35989	0.0948803	-3.79309	0.000148785	0.00119877	yes	female
CG7110	544.917	0.74	-0.439403	0.115871	-3.79218	0.000149329	0.00120236	yes	female
CG4658	2669.48	1.27	0.341233	0.090062	3.78886	0.000151338	0.00121774	yes	female
CR31451	29599.9	1.4	0.486344	0.128368	3.78867	0.000151457	0.0012179	yes	female
Tsp74F	2801.41	1.33	0.415928	0.109834	3.78689	0.000152544	0.00122584	yes	female
Ndae1	3804.93	0.82	-0.285068	0.0752904	-3.78625	0.000152936	0.00122819	yes	female
salr	511.086	0.67	-0.57327	0.151436	-3.78556	0.000153361	0.00123079	yes	female
l(1)G0196	5969.76	0.78	-0.364734	0.0963593	-3.78515	0.000153616	0.00123204	yes	female
Cirl	7841.02	0.7	-0.518041	0.136883	-3.78456	0.000153982	0.00123417	yes	female
Men-b	10117.2	0.76	-0.393583	0.10411	-3.78045	0.000156546	0.0012539	yes	female
Ccn	1568.05	0.82	-0.278826	0.0738114	-3.77754	0.000158384	0.00126779	yes	female
lute	3827.56	0.79	-0.343508	0.090953	-3.77677	0.000158876	0.0012709	yes	female
CG8301	1388.39	0.78	-0.36516	0.0967301	-3.77504	0.000159982	0.00127892	yes	female
Eip63F-1	3641.4	1.43	0.513981	0.136401	3.76817	0.000164446	0.0013129	yes	female
ninaG	589.79	0.68	-0.55881	0.148293	-3.76829	0.000164371	0.0013129	yes	female
bwa	2463.44	0.78	-0.357714	0.094957	-3.76712	0.000165144	0.00131761	yes	female
Ilp8	119.125	0.49	-1.028	0.273093	-3.76428	0.000167031	0.0013318	yes	female
RpL26	12082.6	1.33	0.415181	0.110311	3.76374	0.000167393	0.0013321	yes	female
rswl	462.673	0.75	-0.417313	0.110875	-3.7638	0.000167349	0.0013321	yes	female
trsn	266.171	1.43	0.517499	0.137486	3.76401	0.00016721	0.0013321	yes	female
Cyp9b2	3040.71	1.44	0.526982	0.140024	3.76352	0.00016754	0.0013324	yes	female
CG8209	700.505	0.72	-0.46704	0.12411	-3.76311	0.000167814	0.00133372	yes	female
CG11857	3314.29	1.26	0.335925	0.0893226	3.76081	0.000169367	0.00134448	yes	female
snoRNA:Me28S-C3227b	17.0856	0.46	-1.12618	0.299453	-3.76078	0.000169386	0.00134448	yes	female
CG14082	726.665	1.44	0.52933	0.140813	3.75911	0.000170522	0.00135211	yes	female
Dh44-R2	810.81	0.81	-0.304216	0.0809293	-3.75904	0.000170568	0.00135211	yes	female
CG8908	140.055	1.5	0.585799	0.155882	3.75797	0.000171299	0.00135703	yes	female
CG12163	15614.6	0.69	-0.535192	0.142452	-3.75701	0.000171956	0.00136135	yes	female
REG	2011.79	1.29	0.362298	0.0964493	3.75636	0.000172405	0.00136403	yes	female
unc79	4850.09	0.66	-0.598378	0.15933	-3.75559	0.000172935	0.00136735	yes	female
CG14142	860.043	0.7	-0.521927	0.138984	-3.75532	0.000173123	0.00136795	yes	female
Dref	1724.96	1.31	0.387687	0.103241	3.75515	0.000173235	0.00136795	yes	female
ap	1952.18	0.78	-0.361942	0.0964606	-3.75223	0.000175269	0.00138313	yes	female
Drep4	2629.5	0.7	-0.520429	0.138738	-3.75116	0.000176016	0.00138724	yes	female
Rpn13	6505.75	0.69	-0.544439	0.145134	-3.75128	0.000175936	0.00138724	yes	female
CG6231	5181.92	0.63	-0.665045	0.177322	-3.7505	0.00017648	0.00139	yes	female
CG42846	267.415	1.54	0.625773	0.166858	3.75033	0.000176604	0.00139009	yes	female
CG11668	207.916	1.99	0.989756	0.26398	3.74937	0.000177282	0.00139454	yes	female
Jhedup	5639.84	0.56	-0.828771	0.221253	-3.74581	0.000179811	0.00141262	yes	female
Pcd	1982.99	1.47	0.553108	0.147654	3.74596	0.000179704	0.00141262	yes	female
CG13220	1401.13	1.43	0.516979	0.138057	3.74469	0.000180614	0.00141712	yes	female
CG42741	115.427	0.59	-0.758748	0.202615	-3.74478	0.000180554	0.00141712	yes	female
Pfdn6	1259.28	1.38	0.466225	0.124514	3.74435	0.000180862	0.00141816	yes	female
CG9646	3583.8	0.83	-0.275307	0.0735479	-3.74324	0.000181666	0.00142264	yes	female
Cpr64Aa	337.174	0.56	-0.842279	0.225009	-3.74331	0.000181614	0.00142264	yes	female
CG3036	9207.98	1.28	0.35807	0.0956691	3.7428	0.000181983	0.00142422	yes	female
CR43281	51.0371	1.87	0.902442	0.24115	3.74224	0.000182388	0.00142557	yes	female
mlt	4820.82	0.62	-0.690876	0.184612	-3.74232	0.000182331	0.00142557	yes	female
Ocrl	2075.44	0.8	-0.31707	0.0847697	-3.74037	0.000183747	0.00143528	yes	female
SmD1	213.082	1.63	0.702065	0.187743	3.73951	0.000184382	0.00143933	yes	female
CG9399	1977.77	0.69	-0.540531	0.144616	-3.7377	0.00018571	0.00144877	yes	female
CG3662	16543.2	0.76	-0.396058	0.106004	-3.73626	0.000186778	0.00145618	yes	female
CG34215	322.821	1.92	0.9413	0.25198	3.73561	0.000187263	0.00145903	yes	female
CG11137	1898.55	1.48	0.561712	0.150376	3.73539	0.000187422	0.00145935	yes	female
CG3793	2285.91	0.69	-0.535053	0.143271	-3.73456	0.000188043	0.00146325	yes	female
Irbp	241.736	1.39	0.473546	0.126844	3.73329	0.000188996	0.00146974	yes	female
Smyd4-3	90.0057	1.71	0.774918	0.207589	3.73295	0.000189253	0.00147081	yes	female
Spt6	5384.14	0.77	-0.370615	0.0993167	-3.73165	0.000190229	0.00147746	yes	female
CG34371	1517.92	0.74	-0.435649	0.116769	-3.73088	0.000190816	0.00148015	yes	female
Dlip1	63.0965	1.79	0.842391	0.225786	3.73093	0.000190774	0.00148015	yes	female
CG42759	19.4074	0.46	-1.11898	0.299967	-3.73035	0.000191216	0.00148232	yes	female
robl	1516.03	1.46	0.547504	0.14678	3.73009	0.00019141	0.00148288	yes	female
CG5676	2534.84	1.41	0.49574	0.132951	3.72874	0.000192439	0.00148992	yes	female
CG17843	39.1748	1.88	0.910176	0.244375	3.72451	0.000195695	0.00151237	yes	female
Cyt-b5	5865.77	1.26	0.335251	0.0900067	3.72474	0.000195519	0.00151237	yes	female
snoRNA:Or-CD1	4996.19	1.57	0.65158	0.174945	3.72449	0.000195709	0.00151237	yes	female
RpL9	18214.5	1.44	0.523343	0.140667	3.72044	0.000198877	0.00153589	yes	female
bru1	3582.27	0.71	-0.49952	0.134295	-3.71957	0.000199561	0.0015402	yes	female
Sec13	1182.24	1.41	0.500146	0.134521	3.71798	0.000200821	0.00154896	yes	female
CG42709	1163.94	0.82	-0.293341	0.0789121	-3.71731	0.000201359	0.00155213	yes	female
RpS11	16373.8	1.46	0.550424	0.148244	3.71297	0.000204843	0.001578	yes	female
nito	1015.55	0.78	-0.35325	0.0951588	-3.71222	0.000205452	0.0015817	yes	female
CG13377	1050.5	1.39	0.475294	0.128057	3.71158	0.00020597	0.00158344	yes	female
GstT1	838.854	1.31	0.394653	0.106334	3.71146	0.000206064	0.00158344	yes	female
shv	835.41	1.37	0.456143	0.122894	3.71168	0.000205885	0.00158344	yes	female
Cpr56F	118.778	0.52	-0.945836	0.25486	-3.7112	0.00020628	0.0015841	yes	female
CG7837	777.215	0.79	-0.331505	0.0893349	-3.71081	0.000206598	0.00158555	yes	female
CG42700	1043.04	0.77	-0.37274	0.100459	-3.71037	0.000206953	0.0015867	yes	female
maf-S	1430.69	1.3	0.378041	0.101889	3.71031	0.000207006	0.0015867	yes	female
Mhcl	7648.97	0.76	-0.388574	0.104733	-3.71014	0.000207145	0.00158677	yes	female
CG8155	1479.91	0.78	-0.355335	0.0958023	-3.70904	0.000208045	0.00159268	yes	female
CG11741	6.67146	2.05	1.03791	0.279852	3.70878	0.000208262	0.00159335	yes	female
Lint-1	1057.61	0.69	-0.545332	0.147074	-3.70787	0.000209012	0.00159809	yes	female
Zcchc7	1937.2	0.73	-0.445396	0.120135	-3.70745	0.000209354	0.00159971	yes	female
CG7582	441.279	0.59	-0.765289	0.206463	-3.70667	0.000210004	0.00160368	yes	female
CG8129	220.395	1.66	0.730158	0.197045	3.70554	0.00021094	0.00160982	yes	female
Rcd7	26.7189	0.5	-0.986038	0.266112	-3.70535	0.000211101	0.00161005	yes	female
bif	7716.23	0.78	-0.364662	0.0984221	-3.70508	0.000211324	0.00161076	yes	female
CG13428	47.8729	2.13	1.0935	0.295189	3.70441	0.000211883	0.00161302	yes	female
sta	19531.5	1.45	0.53109	0.143363	3.70451	0.0002118	0.00161302	yes	female
Dhod	875.273	1.39	0.470867	0.127204	3.70166	0.00021419	0.00162957	yes	female
CG43322	175.37	1.43	0.51139	0.138183	3.70082	0.000214905	0.001634	yes	female
pirk	618.52	1.73	0.788303	0.213038	3.70029	0.000215355	0.0016364	yes	female
Arr1	115714	1.31	0.386867	0.104582	3.69919	0.000216293	0.00164218	yes	female
CG12128	429.337	0.7	-0.510558	0.138023	-3.69908	0.000216383	0.00164218	yes	female
Sdr	1105.38	1.22	0.281869	0.0762673	3.6958	0.000219193	0.00166249	yes	female
Irbp18	876.107	1.35	0.432928	0.117167	3.69497	0.000219911	0.0016669	yes	female
eIF2gamma	2544.46	1.33	0.412644	0.11171	3.69388	0.000220862	0.00167307	yes	female
CG15515	327.09	1.56	0.642658	0.174008	3.69326	0.000221397	0.0016761	yes	female
CG42672	3976.78	0.76	-0.393637	0.106589	-3.69303	0.000221596	0.00167657	yes	female
btv	265.384	0.6	-0.738214	0.199918	-3.69258	0.000221992	0.00167853	yes	female
CG4462	1401.23	0.71	-0.503695	0.136447	-3.69152	0.000222922	0.00168453	yes	female
CG10126	1580.61	1.32	0.404395	0.109584	3.69029	0.000223999	0.00169138	yes	female
CG15153	4.80862	0.48	-1.06885	0.289649	-3.69017	0.000224104	0.00169138	yes	female
CG14933	148.906	1.5	0.586933	0.159073	3.6897	0.000224514	0.00169344	yes	female
reb	766.789	0.64	-0.634103	0.171875	-3.68932	0.000224851	0.00169493	yes	female
Obp19c	233.41	1.55	0.634317	0.171949	3.68898	0.000225151	0.00169616	yes	female
RpL24	15887	1.42	0.507416	0.13758	3.68816	0.000225878	0.00170059	yes	female
CG8397	2173.01	1.34	0.426637	0.115695	3.68759	0.000226386	0.00170337	yes	female
eIF3f1	4036.2	1.34	0.418341	0.113481	3.68644	0.000227411	0.00171003	yes	female
Hasp	19709.6	0.8	-0.313286	0.0849872	-3.68627	0.000227564	0.00171014	yes	female
CG18528	603.639	0.73	-0.461191	0.125195	-3.68378	0.000229802	0.00172591	yes	female
Obp19d	16435.8	1.55	0.628653	0.170683	3.68317	0.000230356	0.001729	yes	female
Rpb12	227.401	1.5	0.583688	0.158498	3.68261	0.000230856	0.0017317	yes	female
NAT1	19957.4	0.7	-0.510235	0.138611	-3.68106	0.000232262	0.00174119	yes	female
bbg	709.259	0.75	-0.419947	0.114109	-3.68021	0.000233037	0.00174593	yes	female
CG12279	312.415	1.54	0.622374	0.169155	3.67932	0.000233858	0.00175101	yes	female
ssp6	892.261	0.78	-0.358348	0.0974002	-3.67913	0.000234029	0.00175123	yes	female
CG42751	22.5128	2.04	1.02979	0.27995	3.67848	0.000234626	0.00175421	yes	female
MESR6	1002.24	0.63	-0.667346	0.181431	-3.67823	0.000234855	0.00175421	yes	female
vers	255.261	0.72	-0.47486	0.129097	-3.67831	0.000234781	0.00175421	yes	female
CG6966	12814.3	0.55	-0.867769	0.235963	-3.67756	0.000235476	0.00175777	yes	female
CG11110	301.963	1.45	0.532894	0.144952	3.67634	0.000236606	0.00176406	yes	female
RpS15Aa	19756.3	1.48	0.562763	0.153076	3.67636	0.000236589	0.00176406	yes	female
Tnks	3072.73	0.76	-0.393515	0.107047	-3.67608	0.000236842	0.00176475	yes	female
Rok	3046.27	0.75	-0.405466	0.110308	-3.67576	0.000237145	0.00176594	yes	female
CG33307	141.158	2.11	1.0775	0.293236	3.67451	0.000238308	0.00177352	yes	female
CG6044	3827.66	0.8	-0.32892	0.0895242	-3.67409	0.000238698	0.00177535	yes	female
CG13339	365.981	1.45	0.5322	0.144908	3.67268	0.000240016	0.00178408	yes	female
CG14692	284.401	0.62	-0.680724	0.185387	-3.67191	0.000240745	0.00178841	yes	female
CG5773	579.271	2.08	1.05942	0.288747	3.66902	0.000243483	0.00180766	yes	female
Spred	4161.44	0.76	-0.395825	0.107932	-3.66736	0.000245069	0.00181834	yes	female
CG33159	43.9724	0.53	-0.916057	0.249955	-3.66489	0.000247449	0.00183489	yes	female
CG1890	400.055	1.37	0.456481	0.124574	3.66434	0.000247976	0.00183733	yes	female
PCB	9615.63	1.29	0.366001	0.0998847	3.66424	0.000248078	0.00183733	yes	female
crc	7162.41	1.24	0.313122	0.0854724	3.66343	0.000248856	0.00184198	yes	female
CG11970	1022.18	0.74	-0.439399	0.119949	-3.66323	0.000249054	0.00184234	yes	female
pncr014:3L	12.0224	2.13	1.08797	0.297146	3.66139	0.000250855	0.00185454	yes	female
CG13893	2180.67	0.83	-0.262112	0.0716095	-3.6603	0.000251917	0.00186128	yes	female
CG7724	697.73	1.47	0.55507	0.151672	3.65968	0.000252534	0.00186471	yes	female
CG10660	743.329	1.29	0.365375	0.0998454	3.65941	0.000252796	0.00186521	yes	female
kek4	1164.04	0.69	-0.540434	0.147688	-3.6593	0.000252905	0.00186521	yes	female
Wdr24	332.929	0.73	-0.448822	0.122703	-3.6578	0.000254393	0.00187506	yes	female
CG10175	2410.48	0.56	-0.829085	0.226689	-3.65737	0.00025482	0.00187708	yes	female
Rgk3	749.438	1.35	0.430458	0.117717	3.65672	0.000255467	0.00188072	yes	female
CR40450	17.0436	0.48	-1.04507	0.285886	-3.65555	0.00025663	0.00188815	yes	female
Chrac-16	184.717	1.54	0.624612	0.17088	3.65527	0.000256909	0.00188908	yes	female
ND-18	3156.86	1.26	0.336239	0.0920552	3.65258	0.000259618	0.00190785	yes	female
vn	705.446	0.8	-0.318844	0.0873044	-3.65209	0.00026011	0.00191032	yes	female
Prosalpha7	5271.56	0.71	-0.503009	0.137751	-3.65157	0.000260644	0.0019131	yes	female
RpL12	12216.6	1.32	0.397611	0.108904	3.65102	0.000261202	0.00191606	yes	female
SPoCk	19640	0.75	-0.409183	0.112078	-3.65087	0.000261359	0.00191606	yes	female
CG31642	117.769	0.68	-0.566448	0.155162	-3.65068	0.000261546	0.00191629	yes	female
CG13067	168.523	0.64	-0.646292	0.177044	-3.65045	0.000261779	0.00191685	yes	female
CG13842	111.739	0.66	-0.607323	0.166404	-3.64969	0.000262556	0.00192139	yes	female
CG9220	858.062	1.34	0.422495	0.115811	3.64815	0.000264133	0.00193179	yes	female
SCOT	1532.01	1.41	0.495278	0.135779	3.64767	0.000264627	0.00193425	yes	female
CG44250	96.9434	0.56	-0.832584	0.228263	-3.64747	0.000264834	0.00193461	yes	female
CG33774	229.382	1.71	0.776351	0.212926	3.64611	0.00026624	0.00194122	yes	female
CG6084	10586.3	1.39	0.472995	0.129732	3.64593	0.000266424	0.00194122	yes	female
cold	1022.86	1.41	0.500415	0.137253	3.64593	0.000266426	0.00194122	yes	female
Glt	3543.78	0.64	-0.642719	0.176289	-3.64583	0.000266529	0.00194122	yes	female
smal	1378.11	0.73	-0.456624	0.125239	-3.64603	0.000266327	0.00194122	yes	female
GIIIspla2	1416.77	1.58	0.657567	0.180369	3.64568	0.000266691	0.00194125	yes	female
CG44837	1306.35	0.69	-0.533728	0.146526	-3.64255	0.000269953	0.00196383	yes	female
pim	14.4301	0.48	-1.06367	0.292215	-3.64003	0.000272602	0.00198193	yes	female
Ubi-p5E	37770.3	0.69	-0.532204	0.146217	-3.63983	0.00027282	0.00198234	yes	female
VGlut	14359.8	0.74	-0.429374	0.117976	-3.63951	0.000273161	0.00198364	yes	female
GCS2beta	1162.74	1.3	0.383977	0.105545	3.63803	0.000274733	0.00199388	yes	female
Diap1	8411.82	1.27	0.345611	0.0950293	3.63689	0.000275954	0.00200156	yes	female
del	94.7825	1.58	0.66168	0.181983	3.63595	0.000276957	0.00200765	yes	female
CG13409	1032.97	0.76	-0.396328	0.109026	-3.63518	0.000277784	0.00201246	yes	female
woc	2513.51	0.77	-0.372021	0.102369	-3.63413	0.000278919	0.00201949	yes	female
TpnC73F	183.497	0.5	-0.992747	0.273221	-3.6335	0.000279605	0.00202327	yes	female
Inx2	8564.4	1.22	0.281768	0.0775608	3.63287	0.000280289	0.00202702	yes	female
Usp16-45	2126.88	0.77	-0.379199	0.104406	-3.63197	0.000281263	0.00203287	yes	female
CG42239	199.282	1.62	0.694012	0.191116	3.63136	0.00028193	0.002036	yes	female
RpL13A	18175.4	1.41	0.498534	0.137289	3.63127	0.000282027	0.002036	yes	female
MP1	1426.1	1.33	0.410847	0.113147	3.63109	0.000282226	0.00203624	yes	female
CG10205	2224.83	1.33	0.408299	0.112504	3.6292	0.000284305	0.00205003	yes	female
Rpn5	7747.78	0.67	-0.570896	0.157322	-3.62884	0.000284698	0.00205166	yes	female
CG14565	378.894	0.47	-1.08429	0.298834	-3.6284	0.000285183	0.00205275	yes	female
Poc1	31.8582	1.93	0.946584	0.260877	3.62847	0.000285108	0.00205275	yes	female
CG33543	1532.16	0.78	-0.364212	0.10039	-3.62797	0.00028566	0.00205498	yes	female
DPCoAC	679.067	1.28	0.358808	0.098914	3.62747	0.000286207	0.00205771	yes	female
cue	1792.88	0.84	-0.257698	0.0710438	-3.62731	0.000286393	0.00205784	yes	female
moody	2524.73	0.78	-0.366653	0.10109	-3.62699	0.000286745	0.00205916	yes	female
Imp	573.329	1.36	0.444182	0.122572	3.62384	0.000290258	0.00208318	yes	female
CR31427	89.1357	0.56	-0.829684	0.229064	-3.62206	0.00029227	0.00209517	yes	female
Octbeta3R	1689.92	0.77	-0.383575	0.105899	-3.62208	0.000292241	0.00209517	yes	female
CG30062	289.201	0.72	-0.469346	0.129612	-3.62117	0.000293269	0.00210111	yes	female
CG3939	265.568	1.51	0.590826	0.163187	3.62054	0.000293992	0.00210506	yes	female
CG4615	1611.5	0.82	-0.289973	0.0800958	-3.62032	0.000294234	0.00210557	yes	female
snRNA:U1:95Ca	45.4446	1.83	0.872304	0.240958	3.62015	0.000294432	0.00210576	yes	female
Rpn7	6826.47	0.69	-0.540747	0.149395	-3.61957	0.000295093	0.00210925	yes	female
Arpc3A	755.063	1.31	0.395058	0.109195	3.6179	0.000297004	0.00212168	yes	female
beta-Man	1792.1	1.17	0.224225	0.0620087	3.61602	0.000299165	0.00213587	yes	female
CG17005	41.837	2.12	1.08392	0.299906	3.6142	0.000301282	0.00214974	yes	female
Rfx	609.985	0.69	-0.535269	0.148156	-3.61287	0.000302826	0.0021595	yes	female
MED1	1180.2	0.75	-0.422383	0.116948	-3.61173	0.000304164	0.00216779	yes	female
CG13144	35.5126	0.56	-0.842414	0.233291	-3.61101	0.000305011	0.00217256	yes	female
Csas	942	1.41	0.493185	0.136591	3.61066	0.000305421	0.00217422	yes	female
CG2017	4644.07	0.81	-0.311806	0.0863722	-3.61003	0.000306164	0.00217604	yes	female
CG6675	2090.47	0.57	-0.821788	0.227652	-3.60984	0.000306385	0.00217604	yes	female
CG8311	1039.36	1.41	0.491102	0.136041	3.60996	0.000306243	0.00217604	yes	female
Ddc	6743.42	0.75	-0.415752	0.115171	-3.60985	0.00030637	0.00217604	yes	female
CG7492	1933.52	0.76	-0.394706	0.109402	-3.60785	0.000308743	0.00218868	yes	female
CG9706	827.484	1.43	0.51243	0.142036	3.60774	0.000308874	0.00218868	yes	female
Gad1	27245.7	0.76	-0.404	0.111981	-3.60774	0.000308877	0.00218868	yes	female
Sfxn2	2639.34	0.78	-0.363859	0.100844	-3.60815	0.000308392	0.00218868	yes	female
MED16	312.387	0.76	-0.392237	0.108784	-3.60564	0.000311387	0.0022052	yes	female
CG9346	347.719	0.73	-0.463561	0.128576	-3.60533	0.000311753	0.00220641	yes	female
Kdm2	1892.29	0.76	-0.401561	0.111387	-3.6051	0.000312028	0.00220641	yes	female
Rh2	5427.38	1.26	0.331553	0.0919692	3.60505	0.000312098	0.00220641	yes	female
CG7376	379.095	0.79	-0.348577	0.0967095	-3.60437	0.000312914	0.00221091	yes	female
Aldh-III	5135.08	1.35	0.431329	0.119711	3.60308	0.000314468	0.00222061	yes	female
RpLP1	20111.2	1.41	0.495751	0.137601	3.60282	0.000314778	0.00222152	yes	female
CG14186	4506.84	1.43	0.512018	0.142128	3.6025	0.000315167	0.00222205	yes	female
Sf3b3	1770.04	1.23	0.302893	0.0840816	3.60237	0.000315331	0.00222205	yes	female
shg	3802.76	0.73	-0.446519	0.123954	-3.6023	0.000315418	0.00222205	yes	female
SoxN	1716.01	0.73	-0.46116	0.128023	-3.60217	0.000315576	0.00222205	yes	female
Lip4	2476.04	1.62	0.69663	0.193427	3.60152	0.000316359	0.00222629	yes	female
CG12822	1014.74	0.74	-0.435064	0.120819	-3.60096	0.00031705	0.0022292	yes	female
CG9941	2822.42	0.81	-0.30379	0.0843709	-3.60065	0.000317425	0.0022292	yes	female
Npl4	4606.93	0.69	-0.543114	0.150841	-3.60058	0.000317509	0.0022292	yes	female
snoRNA:Me28S-G2017	41.756	0.53	-0.915142	0.254175	-3.60044	0.000317679	0.0022292	yes	female
tinc	1031.48	0.69	-0.540982	0.15025	-3.60054	0.000317553	0.0022292	yes	female
CG13473	12.9317	2.11	1.07474	0.298542	3.59997	0.000318249	0.00223192	yes	female
klar	6334.38	0.73	-0.44532	0.123768	-3.59802	0.000320643	0.00224743	yes	female
Tbc1d15-17	1136.34	0.79	-0.348085	0.0967552	-3.59759	0.000321185	0.00224994	yes	female
Gycalpha99B	3477.99	0.78	-0.362917	0.100928	-3.59579	0.000323406	0.00226375	yes	female
Osi12	26.0463	0.52	-0.948141	0.263688	-3.5957	0.000323525	0.00226375	yes	female
jigr1	1502.75	0.82	-0.28938	0.0805115	-3.59427	0.000325306	0.00227492	yes	female
CG45076	1893.32	0.54	-0.894855	0.249065	-3.59286	0.000327072	0.00228597	yes	female
eyg	317.458	0.75	-0.421325	0.117276	-3.5926	0.000327394	0.00228692	yes	female
CG4646	333.019	1.48	0.565044	0.157298	3.5922	0.000327902	0.00228917	yes	female
MFS17	3489.53	1.33	0.411605	0.114596	3.59178	0.000328421	0.00229149	yes	female
CG43729	3188.53	0.73	-0.458897	0.127793	-3.59094	0.000329485	0.00229761	yes	female
CG13082	867.326	1.5	0.587798	0.163698	3.59076	0.000329721	0.00229795	yes	female
Prosbeta7	5875.72	0.74	-0.429996	0.11982	-3.58869	0.000332339	0.00231488	yes	female
CG31759	150.598	1.4	0.488761	0.136221	3.58799	0.000333242	0.00231793	yes	female
ebd1	651.183	0.75	-0.408936	0.113976	-3.58791	0.000333343	0.00231793	yes	female
yps	3465.01	1.31	0.387944	0.108125	3.58792	0.000333324	0.00231793	yes	female
CG32191	683.266	1.4	0.481478	0.134212	3.58744	0.000333934	0.00232073	yes	female
hoip	415.289	1.47	0.557635	0.155517	3.58569	0.000336183	0.00233504	yes	female
Oatp58Db	8.92289	0.48	-1.06536	0.297214	-3.58449	0.000337735	0.00234449	yes	female
RpS8	24381.2	1.39	0.475829	0.132774	3.58374	0.000338708	0.00234992	yes	female
CG43291	28.0356	2.05	1.03434	0.288646	3.58341	0.000339133	0.00235154	yes	female
sun	7923.43	1.48	0.570376	0.159227	3.58215	0.000340772	0.00236157	yes	female
oxt	1465.01	0.78	-0.362585	0.10123	-3.58181	0.000341226	0.00236339	yes	female
CG16885	5827.53	0.65	-0.616525	0.172141	-3.58151	0.000341615	0.00236475	yes	female
stum	204.019	0.66	-0.603281	0.168455	-3.58126	0.000341944	0.00236569	yes	female
CG5861	948.69	1.41	0.494707	0.138192	3.57985	0.000343795	0.00237716	yes	female
CG15385	1184.74	1.31	0.386531	0.107991	3.57927	0.000344552	0.00238105	yes	female
CG3987	62.7897	1.79	0.836735	0.23379	3.57901	0.000344901	0.00238212	yes	female
CG15739	1098.94	0.75	-0.406263	0.113525	-3.5786	0.000345436	0.00238448	yes	female
CG33177	17.6475	0.48	-1.04601	0.292326	-3.57823	0.000345923	0.0023865	yes	female
CG2046	1495.87	0.72	-0.478145	0.133639	-3.57789	0.000346373	0.00238826	yes	female
alpha-PheRS	1305.77	1.33	0.406523	0.11367	3.57633	0.000348451	0.00240125	yes	female
CG34446	101.979	1.71	0.771985	0.215898	3.57569	0.000349301	0.00240575	yes	female
Slmap	4757.47	0.79	-0.346205	0.0968418	-3.57496	0.000350287	0.00241119	yes	female
ND-13A	3612.41	1.38	0.4676	0.130821	3.57436	0.000351079	0.00241529	yes	female
CG31522	6123.72	0.69	-0.532656	0.149111	-3.57222	0.000353969	0.00243353	yes	female
CG31778	1011	1.5	0.581808	0.162875	3.5721	0.000354126	0.00243353	yes	female
boi	203.711	0.66	-0.600215	0.168074	-3.57114	0.000355427	0.0024403	yes	female
CG10165	295.274	1.45	0.533096	0.149281	3.57108	0.000355509	0.0024403	yes	female
CG15615	10.8265	0.48	-1.06817	0.299322	-3.56863	0.000358854	0.00246183	yes	female
Osbp	3269.41	0.75	-0.412025	0.115462	-3.56849	0.000359046	0.00246183	yes	female
crok	519.728	1.48	0.561076	0.157266	3.56769	0.000360143	0.00246797	yes	female
CG11878	7.33809	2.08	1.05752	0.296479	3.56692	0.000361196	0.00247381	yes	female
Epg5	2450.44	0.74	-0.436886	0.122537	-3.56533	0.000363398	0.0024875	yes	female
CG4390	796.193	1.32	0.397466	0.111558	3.56286	0.00036684	0.00250966	yes	female
Shawl	970.508	0.66	-0.605394	0.169928	-3.56264	0.000367139	0.00251032	yes	female
bdg	1547.61	0.76	-0.396027	0.111191	-3.56168	0.000368495	0.00251819	yes	female
CG8249	942.89	1.5	0.587557	0.165047	3.55994	0.000370935	0.00253345	yes	female
eIF1	3865.05	1.29	0.365977	0.102809	3.55979	0.000371146	0.00253348	yes	female
CG14572	749.869	0.48	-1.05947	0.297675	-3.55916	0.000372044	0.0025382	yes	female
nAChRalpha2	1291.34	0.77	-0.369121	0.10373	-3.55849	0.000372997	0.00254329	yes	female
CR42715	9.25708	0.48	-1.06529	0.299469	-3.55728	0.00037472	0.00255362	yes	female
cysu	908.339	0.59	-0.766932	0.215645	-3.55645	0.000375894	0.00255737	yes	female
mle	1988.83	1.25	0.326795	0.0918854	3.55655	0.000375754	0.00255737	yes	female
stops	3327.67	1.38	0.466977	0.131297	3.55666	0.000375601	0.00255737	yes	female
CG43235	3.25071	0.51	-0.959574	0.269881	-3.55554	0.000377207	0.00256488	yes	female
CG3226	682.821	1.37	0.454552	0.127879	3.55455	0.000378624	0.00257309	yes	female
CG5883	257.677	0.61	-0.714808	0.20112	-3.55413	0.000379227	0.00257434	yes	female
Cyp311a1	830.448	1.38	0.463633	0.130447	3.55417	0.000379171	0.00257434	yes	female
CR44070	57.7476	0.58	-0.785896	0.221211	-3.55271	0.000381289	0.00258691	yes	female
Pex16	589.463	1.29	0.364366	0.102571	3.55233	0.000381837	0.0025892	yes	female
Jheh1	2385.38	1.46	0.550785	0.155136	3.55033	0.000384749	0.0026075	yes	female
RpS17	11191.5	1.33	0.416079	0.117228	3.54933	0.000386218	0.00261602	yes	female
Sin3A	8601.03	0.81	-0.309999	0.0873442	-3.54917	0.000386446	0.00261612	yes	female
CG1513	3973.31	0.85	-0.241945	0.0681763	-3.54881	0.000386981	0.00261812	yes	female
mRpL14	417.929	1.41	0.494364	0.139309	3.54868	0.000387167	0.00261812	yes	female
CG9267	645.905	1.36	0.439345	0.123815	3.54841	0.000387561	0.00261875	yes	female
Edem1	2272.21	1.23	0.300696	0.0847431	3.54833	0.000387687	0.00261875	yes	female
CR45621	201.213	0.71	-0.490127	0.138158	-3.54758	0.000388792	0.00262477	yes	female
EMRE	711.2	1.35	0.42839	0.120765	3.54729	0.000389218	0.0026262	yes	female
Tpi	14307.7	1.46	0.550867	0.155317	3.54672	0.000390063	0.00263047	yes	female
sut2	141.193	1.55	0.632225	0.178304	3.54577	0.000391475	0.00263853	yes	female
Tbh	679.816	0.75	-0.412547	0.116355	-3.54559	0.000391739	0.00263887	yes	female
D2hgdh	4005.99	1.39	0.475331	0.134105	3.54448	0.000393392	0.00264855	yes	female
mbf1	1535.24	1.26	0.32777	0.092551	3.5415	0.000397853	0.00267712	yes	female
RabX5	187.397	0.71	-0.502483	0.141944	-3.54	0.000400122	0.00269091	yes	female
Gpo-1	5354.44	0.74	-0.428601	0.121108	-3.539	0.000401651	0.00269972	yes	female
chn	3532.2	0.75	-0.41447	0.117143	-3.53816	0.000402923	0.00270679	yes	female
CG3164	14458.9	0.74	-0.432383	0.122379	-3.53316	0.000410622	0.002757	yes	female
Pfdn1	517.447	1.46	0.542222	0.153486	3.53272	0.000411307	0.00276009	yes	female
pen-2	387.118	1.48	0.567071	0.160591	3.53114	0.000413767	0.00277509	yes	female
msd1	14.7335	2.05	1.03308	0.292605	3.53062	0.00041458	0.00277902	yes	female
CG32856	257.143	1.5	0.584761	0.165707	3.52889	0.000417307	0.00279563	yes	female
sns	1641.76	0.65	-0.618163	0.175179	-3.52876	0.000417513	0.00279563	yes	female
Ufc1	1063.02	1.44	0.52788	0.149752	3.52502	0.000423455	0.00283388	yes	female
CG32486	5456.29	0.74	-0.443179	0.125767	-3.52382	0.000425366	0.00284512	yes	female
GstE2	968.416	1.31	0.394433	0.11197	3.52266	0.000427237	0.00285607	yes	female
CG8177	4067.58	0.63	-0.65524	0.186052	-3.52182	0.000428599	0.00286207	yes	female
RpL23	16830.7	1.41	0.500537	0.142124	3.52184	0.000428561	0.00286207	yes	female
S-Lap7	50.9784	0.48	-1.05553	0.299739	-3.5215	0.00042911	0.00286392	yes	female
CG2076	1879.78	1.22	0.28861	0.0819716	3.52086	0.00043015	0.0028693	yes	female
RpS27	8627.05	1.33	0.413421	0.117438	3.52032	0.000431023	0.00287357	yes	female
CG17029	1317.9	1.31	0.388928	0.110507	3.51949	0.000432371	0.00288099	yes	female
CG4753	863.229	0.69	-0.532214	0.151246	-3.51886	0.000433411	0.00288635	yes	female
Uba1	9418.41	0.74	-0.443681	0.126162	-3.51675	0.00043687	0.00290781	yes	female
Art4	634.488	0.79	-0.347161	0.098828	-3.51278	0.000443452	0.00295002	yes	female
CG4592	268.338	1.45	0.537373	0.153055	3.51098	0.000446454	0.00296839	yes	female
CG2875	359.588	1.27	0.34791	0.0991291	3.50966	0.000448674	0.00298153	yes	female
Cpr100A	2383.82	0.63	-0.668024	0.190365	-3.50918	0.000449498	0.0029854	yes	female
CG1628	902.158	0.62	-0.696795	0.198581	-3.50887	0.000450018	0.00298724	yes	female
18w	3628.38	0.86	-0.224885	0.0640987	-3.50841	0.000450788	0.00299073	yes	female
CG15203	684.677	1.55	0.633226	0.180591	3.5064	0.000454214	0.00301183	yes	female
Tsp42Ed	981.97	1.29	0.372666	0.106302	3.50573	0.000455358	0.00301779	yes	female
Smg5	7504.32	0.81	-0.301866	0.0861336	-3.50463	0.00045725	0.0030287	yes	female
Unc-89	10363	0.62	-0.696133	0.198665	-3.50406	0.000458222	0.0030335	yes	female
AdoR	350.404	0.75	-0.423939	0.121004	-3.50352	0.000459158	0.00303806	yes	female
Dnah3	30.6414	0.53	-0.923018	0.263546	-3.50231	0.000461247	0.00305024	yes	female
Br140	763.349	0.74	-0.432722	0.123564	-3.50201	0.00046176	0.00305199	yes	female
Plap	1776.43	0.8	-0.313149	0.0894472	-3.50094	0.000463622	0.00306264	yes	female
Pgd	5251.98	1.35	0.428696	0.122602	3.49666	0.00047113	0.00311057	yes	female
CR33963	239.535	1.44	0.529951	0.151577	3.49626	0.000471829	0.00311351	yes	female
CR45441	12.1371	0.49	-1.03676	0.296612	-3.49533	0.000473478	0.00312104	yes	female
Kcmf1	7501.79	0.85	-0.229065	0.0655342	-3.49535	0.000473432	0.00312104	yes	female
CG5445	954.68	0.7	-0.517044	0.147944	-3.49486	0.000474314	0.00312488	yes	female
CG5346	1590.01	1.41	0.492027	0.140794	3.49466	0.000474659	0.00312547	yes	female
Ost48	1000.08	1.42	0.507192	0.145147	3.49433	0.000475245	0.00312765	yes	female
CG10863	5747.17	1.18	0.23862	0.0682937	3.49403	0.000475791	0.00312874	yes	female
Cyp9c1	188.105	1.52	0.600975	0.172004	3.49396	0.000475918	0.00312874	yes	female
CG17018	58.551	0.59	-0.763567	0.21866	-3.49203	0.000479361	0.00314969	yes	female
GatA	440.071	1.47	0.557304	0.159615	3.49156	0.000480214	0.00315328	yes	female
RpS28b	22254.8	1.44	0.525664	0.150558	3.49144	0.000480421	0.00315328	yes	female
CG7789	574.518	1.34	0.417468	0.119606	3.49037	0.000482344	0.00316421	yes	female
CG4991	2020.53	1.2	0.260736	0.0747087	3.49004	0.000482951	0.0031665	yes	female
LManI	662.208	1.36	0.446642	0.128021	3.48883	0.000485142	0.00317917	yes	female
Hr39	1416.25	0.68	-0.561196	0.160882	-3.48824	0.000486204	0.00318443	yes	female
CG7091	13.4963	2.01	1.00536	0.288286	3.48736	0.00048781	0.00319324	yes	female
CG15661	2445.56	0.69	-0.529244	0.151771	-3.48713	0.000488241	0.00319437	yes	female
Nop56	1071.29	1.3	0.383221	0.109925	3.48621	0.00048991	0.00320188	yes	female
PIG-K	736.538	1.34	0.427258	0.122553	3.4863	0.000489742	0.00320188	yes	female
CG15706	1418.98	0.79	-0.339646	0.097457	-3.48509	0.000491975	0.00321366	yes	female
AnxB11	1709.82	1.21	0.279721	0.0803187	3.48264	0.000496502	0.00324151	yes	female
CG31229	833.309	1.42	0.504473	0.144888	3.48181	0.000498038	0.00324981	yes	female
His4r	8704.24	1.41	0.492323	0.141464	3.48019	0.00050106	0.00326779	yes	female
Catsup	1396.48	1.45	0.53347	0.153329	3.47926	0.000502797	0.00327654	yes	female
CG5390	2794.09	1.38	0.459649	0.132114	3.47919	0.000502934	0.00327654	yes	female
CG13585	2343.93	1.32	0.404248	0.116207	3.4787	0.000503843	0.00328072	yes	female
eIF4E1	4733.44	1.21	0.279441	0.0803354	3.47843	0.000504353	0.0032823	yes	female
CR42862	43156.1	0.6	-0.736137	0.21167	-3.47776	0.00050563	0.00328887	yes	female
CG6766	2214.82	1.24	0.312297	0.0898925	3.47412	0.000512527	0.00333197	yes	female
ssp3	1794.39	0.75	-0.411251	0.118384	-3.47387	0.000513001	0.00333329	yes	female
CG3838	1415.05	0.74	-0.433432	0.124784	-3.47345	0.000513821	0.00333685	yes	female
Ppt2	1518.04	0.74	-0.432965	0.124723	-3.47141	0.000517736	0.00336049	yes	female
CG4896	879.625	0.73	-0.445246	0.128267	-3.47124	0.000518053	0.00336078	yes	female
Cht2	3046.54	0.66	-0.609006	0.175472	-3.47068	0.000519149	0.00336611	yes	female
CG11099	3334.11	0.8	-0.317081	0.0913755	-3.47009	0.00052028	0.00337167	yes	female
snoRNA:Psi28S-1135c	1180.92	1.78	0.833079	0.240168	3.46873	0.000522926	0.00338703	yes	female
aos	1314.94	0.72	-0.474231	0.136737	-3.4682	0.000523961	0.00339016	yes	female
Utx	1178.33	0.82	-0.294141	0.0848102	-3.46823	0.000523905	0.00339016	yes	female
Tim8	1015.32	1.32	0.404834	0.116867	3.46406	0.000532088	0.00344093	yes	female
CG7860	514.055	1.56	0.638941	0.184495	3.46318	0.000533827	0.00345036	yes	female
CG15111	2549.04	1.3	0.374327	0.108107	3.46255	0.000535081	0.00345516	yes	female
CG7824	249.469	1.4	0.489223	0.141291	3.46253	0.000535131	0.00345516	yes	female
CG11334	461.022	1.31	0.388142	0.112114	3.46203	0.000536114	0.00345968	yes	female
cib	2605.18	0.72	-0.482263	0.139316	-3.46164	0.000536899	0.00346111	yes	female
CR45951	107.511	0.67	-0.586701	0.169482	-3.46172	0.000536727	0.00346111	yes	female
Nhe2	1799.18	0.66	-0.608693	0.175883	-3.46079	0.000538601	0.00347026	yes	female
alpha-Man-Ia	9685.98	0.73	-0.445845	0.128876	-3.45949	0.000541209	0.00348524	yes	female
brun	1257.73	0.71	-0.497177	0.143752	-3.45857	0.000543047	0.00349492	yes	female
Ts	65.7585	0.59	-0.757309	0.218973	-3.45846	0.000543281	0.00349492	yes	female
CG7518	3148.74	0.74	-0.428283	0.123858	-3.45785	0.000544501	0.00350093	yes	female
Nep2	3760.48	0.72	-0.480267	0.138903	-3.45758	0.000545055	0.00350234	yes	female
slif	3030.22	0.62	-0.690518	0.199718	-3.45746	0.000545289	0.00350234	yes	female
CG34132	716.614	1.43	0.520166	0.150512	3.45597	0.000548311	0.0035199	yes	female
CG12129	392.139	1.41	0.499718	0.144607	3.4557	0.000548861	0.0035216	yes	female
CG7296	1494.19	1.58	0.655999	0.189915	3.45418	0.000551978	0.00353975	yes	female
CG14615	173.989	1.46	0.543755	0.157474	3.45298	0.000554431	0.00355186	yes	female
Hen1	144.921	1.48	0.568262	0.164572	3.45297	0.000554445	0.00355186	yes	female
CCT7	1787.49	1.21	0.272565	0.0789401	3.4528	0.000554794	0.00355224	yes	female
CG10232	15.0469	2.03	1.02377	0.296585	3.45187	0.000556721	0.00356237	yes	female
Cyp6g2	34.1835	0.53	-0.917992	0.265949	-3.45175	0.000556955	0.00356237	yes	female
Alp1	14.8338	2.03	1.02212	0.296156	3.45129	0.000557914	0.00356664	yes	female
MtnE	31.0087	1.85	0.885531	0.256636	3.45053	0.00055949	0.00357486	yes	female
CR45140	85.5709	0.59	-0.772095	0.223947	-3.44767	0.000565454	0.00361109	yes	female
CG31108	1182.24	0.84	-0.254415	0.073797	-3.4475	0.000565799	0.00361141	yes	female
Gr2a	6.96943	2.02	1.01363	0.294042	3.44723	0.000566362	0.00361313	yes	female
CG11562	320.069	1.52	0.603567	0.175164	3.44573	0.000569521	0.00362955	yes	female
CG4594	155.42	1.52	0.600383	0.17424	3.44573	0.000569526	0.00362955	yes	female
CG6426	4288.41	0.66	-0.596557	0.17316	-3.44513	0.00057079	0.00363434	yes	female
Nacalpha	6279.34	1.22	0.28814	0.0836378	3.44509	0.000570869	0.00363434	yes	female
Cyp28a5	3429.53	1.33	0.409527	0.118893	3.44451	0.0005721	0.00363793	yes	female
mRpL55	268.2	1.47	0.552476	0.160389	3.44461	0.000571891	0.00363793	yes	female
Usp8	3667.99	1.41	0.495781	0.143938	3.4444	0.000572322	0.00363793	yes	female
TBC1D5	637.606	0.78	-0.351056	0.10193	-3.44408	0.000573006	0.00364039	yes	female
Mtch	2817.67	1.33	0.408857	0.118846	3.44022	0.000581237	0.00369078	yes	female
Npc1a	9604.14	0.87	-0.192646	0.0560072	-3.43967	0.000582432	0.00369646	yes	female
NfI	2472.58	0.7	-0.511862	0.148828	-3.43928	0.000583272	0.00369851	yes	female
Skeletor	790.703	0.75	-0.406825	0.118289	-3.43924	0.000583358	0.00369851	yes	female
RpLP2	23425.3	1.49	0.574796	0.167164	3.43851	0.000584927	0.00370655	yes	female
CG4069	281.531	1.3	0.381389	0.111	3.43594	0.000590493	0.00373989	yes	female
CG3699	904.634	1.64	0.713263	0.207599	3.43578	0.00059085	0.00374022	yes	female
CG17404	122.08	0.66	-0.602087	0.175249	-3.43561	0.000591226	0.00374068	yes	female
CG6574	899.195	1.3	0.377831	0.110009	3.43453	0.000593588	0.00375369	yes	female
grnd	1065.67	1.21	0.269731	0.0785498	3.43389	0.000594986	0.00376059	yes	female
mtSSB	233.538	1.49	0.57071	0.166241	3.43303	0.000596871	0.00377057	yes	female
Gapdh1	32830	1.34	0.422761	0.123156	3.43272	0.000597549	0.00377291	yes	female
CG34351	2287.71	0.72	-0.466081	0.135785	-3.43249	0.00059806	0.0037742	yes	female
CG16717	403.168	1.29	0.368744	0.107438	3.43215	0.000598807	0.00377697	yes	female
CG5037	1707.57	0.78	-0.359971	0.10489	-3.43187	0.000599425	0.00377893	yes	female
CG1635	1221.86	1.31	0.384213	0.111965	3.43155	0.000600132	0.00378145	yes	female
CG9272	95.2257	1.54	0.624907	0.182123	3.43123	0.000600847	0.00378401	yes	female
CG6834	1147.63	1.31	0.390012	0.113706	3.43002	0.000603542	0.00379904	yes	female
CG14274	1164.5	0.83	-0.275468	0.0803409	-3.42874	0.00060639	0.00381501	yes	female
CR43425	112.915	0.68	-0.559312	0.16315	-3.42821	0.00060758	0.00382054	yes	female
Hmu	972.661	1.28	0.360393	0.105131	3.42804	0.000607962	0.00382099	yes	female
RpL39	10783.9	1.51	0.590649	0.172337	3.42729	0.000609634	0.00382954	yes	female
CG13532	382.904	0.76	-0.405209	0.118258	-3.42648	0.000611458	0.00383903	yes	female
CG7484	646.365	1.41	0.493268	0.143975	3.42606	0.000612409	0.00384304	yes	female
CG3119	212.339	0.64	-0.636959	0.186017	-3.42421	0.000616594	0.00386732	yes	female
CG6163	276.669	0.77	-0.371863	0.108625	-3.42336	0.000618521	0.00387743	yes	female
CG13366	1742.46	0.77	-0.37054	0.108282	-3.42198	0.00062166	0.00389512	yes	female
CG9669	235.559	1.5	0.588284	0.172033	3.41961	0.000627117	0.00392731	yes	female
sad	46.4457	1.7	0.762767	0.223083	3.41921	0.000628023	0.00393098	yes	female
GlcT-1	1023.16	0.74	-0.442174	0.129405	-3.41698	0.000633197	0.00396088	yes	female
scny	3034.26	0.73	-0.452937	0.132559	-3.41687	0.000633445	0.00396088	yes	female
CG16836	1285.04	1.97	0.979638	0.286773	3.41607	0.000635314	0.00396853	yes	female
CG7714	31.906	0.53	-0.910732	0.266599	-3.41611	0.000635234	0.00396853	yes	female
CG2641	122.351	1.49	0.572522	0.167609	3.41581	0.000635919	0.00397029	yes	female
CG14483	1431.37	1.38	0.469668	0.137509	3.41553	0.00063658	0.0039724	yes	female
CR44748	51.4101	0.57	-0.808325	0.236682	-3.41524	0.000637253	0.00397337	yes	female
topi	49.2289	0.54	-0.877029	0.256802	-3.41519	0.000637382	0.00397337	yes	female
cdi	4016.6	0.77	-0.372456	0.109103	-3.41379	0.000640651	0.00398974	yes	female
CecA1	455.368	2.01	1.00844	0.295406	3.41372	0.000640816	0.00398974	yes	female
hpRNA:CR33940	918.086	1.46	0.542079	0.158797	3.41365	0.000640982	0.00398974	yes	female
CG43885	15.8773	0.51	-0.967029	0.283335	-3.41302	0.000642464	0.00399694	yes	female
Ir31a	51.5343	0.55	-0.85121	0.249442	-3.41246	0.000643797	0.0040032	yes	female
alpha-Est3	1063.51	1.31	0.384523	0.112705	3.41176	0.000645447	0.0040094	yes	female
CG13699	28.9359	1.99	0.989314	0.289964	3.41185	0.000645233	0.0040094	yes	female
Npc2a	5334.38	1.38	0.467648	0.13709	3.41125	0.000646657	0.00401296	yes	female
tok	9104.86	0.7	-0.513832	0.150629	-3.41124	0.000646673	0.00401296	yes	female
Fer1HCH	19370.2	1.26	0.328861	0.0964402	3.41	0.000649629	0.00402927	yes	female
pxb	318.616	0.67	-0.570695	0.167381	-3.40956	0.00065067	0.00403369	yes	female
ASTR	54.1738	0.62	-0.678436	0.199021	-3.40887	0.000652321	0.00404189	yes	female
CG6055	795.055	0.5	-0.990459	0.290579	-3.40857	0.000653038	0.00404429	yes	female
Toll-7	2130.97	0.74	-0.444005	0.130446	-3.40374	0.000664695	0.00411441	yes	female
RpL32	12123.4	1.45	0.539497	0.158562	3.40244	0.00066787	0.00413198	yes	female
e(y)3	2830.54	0.74	-0.441994	0.129952	-3.4012	0.000670913	0.00414872	yes	female
CG33129	2390.45	1.29	0.36331	0.10689	3.39892	0.000676525	0.00418132	yes	female
Cyp6v1	920.356	1.24	0.313763	0.09233	3.39828	0.000678115	0.00418904	yes	female
CG9886	862.335	1.33	0.407113	0.119812	3.39792	0.000678995	0.00419237	yes	female
Axn	991.425	0.66	-0.597255	0.175817	-3.39703	0.000681227	0.00420404	yes	female
casp	2745.31	0.79	-0.342321	0.100783	-3.39661	0.00068225	0.00420481	yes	female
CG31075	1839.19	1.61	0.683085	0.201111	3.39656	0.000682379	0.00420481	yes	female
eIF2alpha	2004.94	1.26	0.335257	0.0987039	3.39659	0.000682306	0.00420481	yes	female
SkpA	4997.02	1.26	0.332399	0.0978978	3.39536	0.000685372	0.00422113	yes	female
CG3246	1714.88	1.5	0.583274	0.172035	3.39044	0.000697798	0.00429369	yes	female
E5	132.505	0.69	-0.535378	0.157909	-3.39042	0.00069785	0.00429369	yes	female
Sox14	1405.65	0.68	-0.557745	0.164552	-3.38948	0.000700258	0.00430634	yes	female
[truncated: 33,476 more rows]
